# Supplementary material for: Direct synthesis of methyl phosphoramidates in carbohydrates
Source: Royal Society of Chemistry journal article supplement (doi:10.1039/c5ob01017a), 2015-01-01

## Direct synthesis of methyl phosphoramidates in carbohydrates

Vijay M. Dhurandhare<sup>[1,3,4]</sup>, Girija Prasad Mishra<sup>[1,2]</sup>, Sarah Lam<sup>[1]</sup> and Cheng-Chung Wang\*<sup>[1,3]</sup>

[1] Institute of Chemistry, Academia Sinica, 128, Section 2, Academia Road, Taipei, 115, Taiwan

[2] Genomics Research Center, Academia Sinica

[3] Chemical Biology and Molecular Biophysics, Taiwan International Graduate Program (TIGP), Academia Sinica, 128, Section 2, Academia Road, Taipei, 115, Taiwan

[4] Institute of Bioinformatics and Structural Biology, National Tsing Hua University, 101, Section 2, Kuang-Road, Hsinchu 300, Taiwan

### SUPPORTING INFORMATION

#### General Information

All reactions were conducted in flame-dried glassware, under nitrogen atmosphere. Methanol, acetonitrile and dichloromethane were purified and dried by using a safe purification system filled with anhydrous Al<sub>2</sub>O<sub>3</sub>. All other reagents were obtained from commercial sources and used without further purification unless otherwise mentioned. Water was either distilled or Mili-Q-purified. Flash column chromatography was carried out on Silica Gel 60 (230-400 mesh, E. Merck). TLC was performed on re-coated glass plates of Silica Gel 60 F254 (0.25 mm, E. Merck); detection was executed by spraying a solution of Ce(NH<sub>4</sub>)<sub>2</sub>(NO<sub>3</sub>)<sub>6</sub>, (NH<sub>4</sub>)<sub>6</sub>Mo<sub>7</sub>O<sub>24</sub>, and H<sub>2</sub>SO<sub>4</sub> in water and subsequent heating on a hot plate. Specific rotations were taken at ambient temperature conditions and reported in 10<sup>-1</sup>·deg·cm<sup>2</sup>·g<sup>-1</sup>; the sample concentrations are in g·dL<sup>-1</sup>. <sup>1</sup>H and <sup>13</sup>C NMR spectra were recorded on AV 400 MHz, AVIII 400 and DRX 500 MHz Bruker instruments. Chemical shifts are in ppm from Me<sub>4</sub>Si, calibrated at δ 7.24 or δ 0.00 for <sup>1</sup>H spectra (residual CHCl<sub>3</sub> or TMS respectively), and δ 77.23 for <sup>13</sup>C spectra. Splitting patterns were designated as follows: s = singlet, d = doublet, t = triplet, q = quartet, m = multiplet, br = broad. Proton peak were assigned based on 2D NMR spectra (<sup>1</sup>H-<sup>1</sup>H COSY, HSQC, and NOESY). For the NMR spectrum of diastereomeric mixtures, the assignment of one of the two diastereomers was indicated by “\*”.

## Synthetic procedures and characterization data

### Preparation of phosphorylating agent 1

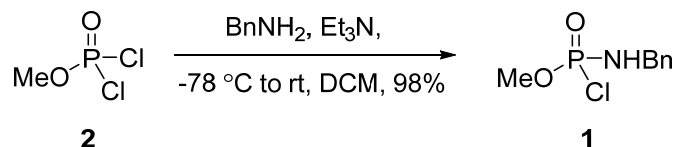

#### Methyl benzylphosphoramidochloridate (**1**).

To the solution of benzylamine (710 mg, 740  $\mu\text{L}$ , 6.71 mmol) in dry  $\text{CH}_2\text{Cl}_2$  was added triethylamine (680 mg, 940  $\mu\text{L}$ , 6.71 mmol) at rt. The mixture was cooled to  $-78\text{ }^\circ\text{C}$ . Methyl dichlorophosphate (1.0 g, 670  $\mu\text{L}$ , 6.71 mmol) was added dropwise to the mixture over 20 min. After complete addition, the temperature was raised to rt and stirred for additional 1 h, and the reaction was monitored by TLC using Nihydrin as the stain. Upon completion, the  $\text{CH}_2\text{Cl}_2$  was evaporated under reduced pressure and a white solid was obtained, which was re-suspended with diethyl ether. The undesired solid was filtered off, and the diethyl ether filtrate was concentrated under a reduced pressure to afford **1** as a colorless oil (1.45 g, 98%); IR ( $\text{CHCl}_3$ )  $\nu$  3199, 1496, 1252, 1026, 732, 695  $\text{cm}^{-1}$ ;  $^1\text{H}$  NMR (400 MHz,  $\text{CDCl}_3$ )  $\delta$  7.32-7.25 (m, 5H, ArH), 4.15 (d,  $J$  = 11.6 Hz, 2H,  $\text{PhCH}_2$ ), 3.81 (d,  $J$  = 13.7 Hz, 3H,  $\text{OCH}_3$ );  $^{13}\text{C}$  NMR (100 MHz,  $\text{CDCl}_3$ )  $\delta$  137.8 (d,  $J$  = 8.5 Hz, C), 128.6 (CH x 2), 127.7 (CH), 127.4 (CH x 2), 54.0 (d,  $J$  = 6.1 Hz,  $\text{CH}_3$ ), 45.7 ( $\text{CH}_2$ );  $^{31}\text{P}$  NMR (161.97 MHz,  $\text{CDCl}_3$ )  $\delta$  16.8; HRMS (ESI) calcd for  $\text{C}_8\text{H}_{12}\text{NO}_2\text{ClP}$   $[\text{M}+\text{H}]^+$  220.0294, found 220.0290.

**NOTE:** This reagent is stable only for 5-6h. Prepare freshly before use.

#### General procedure for direct synthesis of methyl phosphoramidates:

To a solution of an alcohol (100 mg) and DMAP (1.0 equiv) in dry  $\text{CH}_2\text{Cl}_2$  (2 mL) was added NMI (*N*-methylimidazole) (8.0 equiv) at rt. Methyl benzylphosphoramidochloridate (**1**) (4.0 equiv) in  $\text{CH}_2\text{Cl}_2$  (1 mL) was added dropwise over a period of 2-3 min at rt. The reaction mixture was allowed to stir at rt as the time indicated in Table 2. The reaction was monitored by TLC, and upon completion, the volatiles were removed *in vacuo*. The residue was purified by column chromatography to afford the desired product in good to excellent yield.

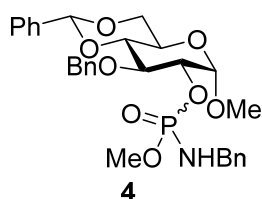

**Methyl 3-O-benzyl-4,6-O-benzylidene-2-O-(methyl N-benzylphosphoramidyl)- $\alpha$ -D-glucopyranoside (4).**

Colorless oil,  $[\alpha]_D^{26}$  40.1 ( $c$  0.5,  $\text{CHCl}_3$ ); IR ( $\text{CHCl}_3$ )  $\nu$  2935, 2866, 1496, 1177, 1072, 1050, 994, 934, 697, 675  $\text{cm}^{-1}$ ;  $^1\text{H}$  NMR (400 MHz,  $\text{CDCl}_3$ )  $\delta$  7.47-7.44 (m, 2H, ArH), 7.47-7.44 (m, 2H, ArH\*), 7.38-7.30 (m, 4H, ArH), 7.38-7.30 (m, 4H, ArH\*), 7.29-7.18 (m, 8H, ArH), 7.29-7.18 (m, 8H, ArH\*), 7.11-7.09 (m, 1H, ArH), 7.11-7.09 (m, 1H, ArH\*), 5.56 (s, 1H, PhCH), 5.55 (s, 1H, PhCH\*), 5.04 (d,  $J = 3.6$  Hz, 1H, H-1), 4.99 (d,  $J = 3.6$  Hz, 1H, H-1\*), 4.94 (d,  $J = 11.1$  Hz, 1H,  $\text{CH}_2\text{Ph}$ ), 4.89 (d,  $J = 11.2$  Hz, 1H,  $\text{CH}_2\text{Ph}^*$ ), 4.71 (d,  $J = 11.2$  Hz, 1H,  $\text{CH}_2\text{Ph}$ ), 4.63 (d,  $J = 11.2$  Hz,  $\text{CH}_2\text{Ph}$ ), 4.38 (td,  $J = 10.2, 5.0$  Hz, 4H, H-2, H-6a, H-2\*, H-6a\*), 4.0 (td,  $J = 9.2, 2.8$  Hz, 2H, H-3, H-3\*) 3.95 (dd,  $J = 9.4, 7.0$  Hz, 2H,  $\text{CH}_2$ ,  $\text{CH}_2^*$ ), 3.90-3.82 (m, 2H, H-5, H-5\*), 3.78-3.71 (m, 2H, H-6b, H-6b\*), 3.66 (d,  $J = 11.4$  Hz, 3H,  $\text{CH}_3$ ), 3.65-3.63 (m, 2H, H-4, H-4\*), 3.61 (d,  $J = 11.2$  Hz, 3H,  $\text{CH}_3^*$ ), 3.45 (s, 3H,  $\text{OCH}_3$ ), 3.37 (s, 3H,  $\text{OCH}_3^*$ ), 3.04-2.99 (m, 2H, NH, NH\*);  $^{13}\text{C}$  NMR (100 MHz,  $\text{CDCl}_3$ )  $\delta$  139.5 (C), 139.4 (C), 139.3 (C), 138.3 (C\*); 138.1 (C\*), 137.2 (C\*), 128.9 (CH x 2), 128.5 (CH), 128.4 (CH x 3), 128.3 (CH x 3), 128.2 (CH x 3), 128.2 (CH x 3), 127.9 (CH x 3), 127.7 (CH x 2), 127.5 (CH), 127.3 (CH), 127.3 (CH x 3), 127.1 (CH x 2), 125.9 (CH x 3), 101.3 (PhCH, PhCH\*), 99.1 (CH), 98.8 (CH\*), 82.4 (CH), 82.1 (CH\*), 74.8 (CH), 75.9 (CH\*), 77.1 (CH), 77.0 (CH\*), 74.8 (CH), 75.9 (CH\*), 75.2 ( $\text{CH}_2$ ), 69.0 ( $\text{CH}_2$ ), 55.5 ( $\text{CH}_3$ ), 55.3 ( $\text{CH}_3$ ), 53.4 ( $\text{CH}_3$ ,  $\text{CH}_3^*$ ), 53.3 ( $\text{CH}_3$ ,  $\text{CH}_3^*$ ), 45.2 ( $\text{CH}_2$ ), 45.2 ( $\text{CH}_2^*$ );  $^{31}\text{P}$  NMR (161.97 MHz,  $\text{CDCl}_3$ ):  $\delta$  11.0, 9.5; HRMS (ESI) calcd for  $\text{C}_{29}\text{H}_{34}\text{NNaO}_8\text{P}$   $[\text{M}+\text{Na}]^+$  578.1920, found 578.1924.

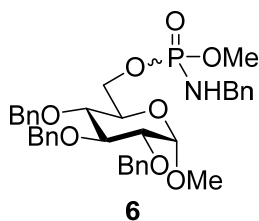

**Methyl 2,3,4-tri-*O*-benzyl-6-*O*-(methyl *N*-benzylphosphoramidyl)- $\alpha$ -D-glucopyranoside (6).**

Colorless oil,  $[\alpha]^{26}_D$  27.9 (*c* 0.5, CHCl<sub>3</sub>); IR (CHCl<sub>3</sub>)  $\nu$  3214, 3029, 2909, 1495, 1243, 1070, 1049, 1017, 737, 697 cm<sup>-1</sup>; <sup>1</sup>H NMR (400 MHz, CDCl<sub>3</sub>)  $\delta$  7.34-7.20 (m, 20H, ArH), 7.34-7.20 (m, 20H, ArH\*), 4.96 (d, *J* = 11.0 Hz, 1H, CH<sub>2</sub>Ph), 4.96 (d, *J* = 11.0 Hz, 1H, CH<sub>2</sub>Ph\*), 4.87-4.73 (m, 3H, CH<sub>2</sub>Ph, CH<sub>2</sub>Ph), 4.87-4.73 (m, 3H, CH<sub>2</sub>Ph\*, CH<sub>2</sub>Ph\*), 4.64-4.54 (m, 3H, CH<sub>2</sub>Ph, H-1), 4.64-4.54 (m, 3H, CH<sub>2</sub>Ph\*, H-1\*), 4.27-4.12 (m, 2H, H-6a, H-6b), 4.27-4.12 (m, 2H, H-6a\*, H-6b\*), 4.07 (d, *J* = 6.8 Hz, 2H, CH<sub>2</sub>), 4.06 (d, *J* = 6.8 Hz, 2H, CH<sub>2</sub>\*), 3.98 (t, *J* = 9.4, 1H, H-3), 3.97 (t, *J* = 9.2, 1H, H-3\*), 3.78-3.71 (m, 1H, H-5), 3.78-3.71 (m, 1H, H-5\*), 3.68 (d, *J* = 11.0 Hz, 3H, CH<sub>3</sub>), 3.65 (d, *J* = 11.4 Hz, 3H, CH<sub>3</sub>\*), 3.51 (t, *J* = 9.2 Hz, 1H, H-4), 3.51 (t, *J* = 9.2 Hz, 1H, H-4\*), 3.48-3.42 (m, 1H, H-2), 3.48-3.42 (m, 1H, H-2\*), 3.33 (s, 3H, OCH<sub>3</sub>), 3.31 (s, 3H, OCH<sub>3</sub>\*), 2.97-2.86 (m, 1H, NH); 2.97-2.86 (m, 1H, NH\*); <sup>13</sup>C NMR (100 MHz, CDCl<sub>3</sub>)  $\delta$  139.4 (C), 138.6 (C), 138.0 (C x 2), 128.5 (CH x 2, C x 1), 128.4 (CH x 3), 128.3 (CH x 3), 128.0 (CH x 2), 127.9 (CH x 4), 127.7 (CH x 2), 127.6 (CH), 127.4 (CH), 127.2 (CH x 2), 98.0 (CH), 98.0 (CH), 81.8 (CH), 79.8 (CH), 75.7 (CH<sub>2</sub> x 2), 75.0 (CH<sub>2</sub> x 2), 73.3 (CH<sub>2</sub> x 2), 69.6 (CH), 69.5 (CH), 65.3 (CH<sub>2</sub>), 65.3 (CH<sub>2</sub>), 55.2 (CH<sub>3</sub>), 53.1 (CH<sub>3</sub>), 45.3 (CH<sub>2</sub>), 45.3 (CH<sub>2</sub>\*); <sup>31</sup>P NMR (161.97 MHz, CDCl<sub>3</sub>):  $\delta$  10.6, 10.4; HRMS (ESI) calcd for C<sub>36</sub>H<sub>42</sub>NNaO<sub>8</sub>P [M+Na]<sup>+</sup> 670.2546, found 670.2551.

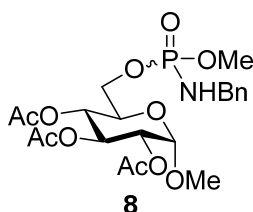

**Methyl 2,3,4-tri-*O*-acetyl-6-*O*-(methyl *N*-benzylphosphoramidyl)- $\alpha$ -D-glucopyranoside (8).**

Colorless oil (a 10:3 mixture of both diastereomers),  $[\alpha]^{21}_D$  107.3 (*c* 0.5, CHCl<sub>3</sub>); IR (CHCl<sub>3</sub>)  $\nu$  2923, 1733, 1716, 1683, 1540, 1215, 10656, 1025, 746, 695 cm<sup>-1</sup>; <sup>1</sup>H NMR (400 MHz, CDCl<sub>3</sub>):  $\delta$  7.29-7.20 (m, 5H, ArH), 7.29-7.20 (m, 5H, ArH\*), 5.44-5.38 (m, 2H, H-3, H-3\*), 5.06 (t, *J* = 9.8 Hz, 1H, H-4\*), 5.0 (t, *J* = 10.0 Hz, 1H, H-4), 4.88 (d, *J* = 6.3 Hz, 1H, H-1), 4.85 (d, *J* = 3.6 Hz, 1H, H-1\*), 4.82 (t, *J* = 3.3 Hz, 1H, H-2), 4.80 (t, *J* = 3.4 Hz, 1H, H-2\*), 4.08-4.01 (m, 8H, H-6a, H-6a\*, H-6b, H-6b\*, CH<sub>2</sub>, CH<sub>2</sub>\*), 3.94-3.88 (m, 2H, H-5, H-5\*), 3.65 (d, *J* = 11.2 Hz, 3H, CH<sub>3</sub>), 3.58 (d, *J* = 9.3 Hz, 3H, CH<sub>3</sub>\*), 3.34 (s, 3H, CH<sub>3</sub>), 3.31 (s, 3H, CH<sub>3</sub>\*), 3.22 (br, 1H, NH), 2.96 (br,

1H, NH\*), 2.02 (s, 3H, CH<sub>3</sub>), 1.99 (s, 3H, CH<sub>3</sub>\*), 1.98 (s, 3H, CH<sub>3</sub>), 1.96 (s, 3H, CH<sub>3</sub>\*), 1.95 (s, 3H, CH<sub>3</sub>), 1.91 (s, 3H, CH<sub>3</sub>\*); <sup>13</sup>C NMR (100 MHz, CDCl<sub>3</sub>): 170.2 (C x 2, C\*), 170.1 (C), 169.9 (C\*), 169.6 (C\*), 140.0 (d, *J* = 3.8 Hz, C), 139.6 (d, *J* = 6.1 Hz, C\*), 128.7 (CH, CH\*), 128.6 (CH, CH\*), 127.5 (CH, CH\*), 127.4 (CH, CH\*), 127.3 (CH, CH\*), 96.82 (CH), 96.77 (CH\*), 70.85 (CH, CH\*), 70.32 (CH\*), 70.26 (CH), 68.41 (CH), 67.91 (CH\*), 64.30, (d, *J* = 4.0 Hz, CH<sub>2</sub>), 64.07 (d, *J* = 4.0 Hz, CH<sub>2</sub>\*), 55.54 (CH<sub>3</sub>, CH<sub>3</sub>\*), 53.44 (CH<sub>3</sub>), 52.15 (CH<sub>3</sub>\*), 45.33 (CH<sub>2</sub>), 45.25 (CH<sub>2</sub>\*), 20.80 (CH<sub>3</sub>, CH<sub>3</sub>\*), 20.76 (CH<sub>3</sub>, CH<sub>3</sub>\*), 20.68 (CH<sub>3</sub>, CH<sub>3</sub>\*); <sup>31</sup>P NMR (161.98 MHz, CDCl<sub>3</sub>): δ 16.59, 10.77, 10.40; HRMS (ESI) calcd for C<sub>21</sub>H<sub>30</sub>NO<sub>11</sub>PNa [M+Na]<sup>+</sup> 526.1454, found 526.1461.

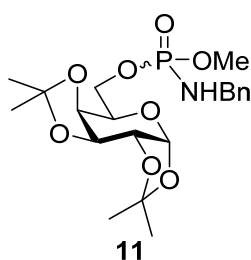

**1,2:3,4-di-O-isopropylidene-6-O-(methyl *N*-benzylphosphoramidyl)-D-galactopyranose (11).**

Colorless oil, [ $\alpha$ ]<sub>D</sub><sup>29</sup> -28.0 (*c* 0.5, CHCl<sub>3</sub>); IR (CHCl<sub>3</sub>)  $\nu$  2987, 2934, 1454, 1253, 1067, 1003, 905, 889, 859, 759, 735 cm<sup>-1</sup>; <sup>1</sup>H NMR (400 MHz, CDCl<sub>3</sub>)  $\delta$  7.29-7.21 (m, 5H, ArH), 7.29-7.21 (m, 5H, ArH\*), 5.48 (d, *J* = 4.8 Hz, 1H, H-1), 5.47 (d, *J* = 4.8 Hz, 1H, H-1\*), 4.57 (dd, *J* = 3.8, 1.8 Hz, 1H, H-3), 4.55 (dd, *J* = 3.8, 1.8 Hz, 1H, H-3\*), 4.27 (dd, *J* = 5.0, 2.4 Hz, 2H, H-2, H-2\*), 4.20-4.02 (m, 12 H, H-4, H-4\*, H-5, H-5\*, H-6a,b, H-6a,b\*, NCH<sub>2</sub>, NCH<sub>2</sub>\*), 3.66 (d, *J* = 11.2 Hz, 3H, CH<sub>3</sub>), 3.66 (d, *J* = 11.2 Hz, 3H, CH<sub>3</sub>\*), 3.15 (br, 2H, NH, NH\*), 1.49 (s, 3H, C(CH<sub>3</sub>)<sub>2</sub>), 1.47 (s, 3H, C(CH<sub>3</sub>)<sub>2</sub>), 1.38 (s, 3H, C(CH<sub>3</sub>)<sub>2</sub>), 1.36 (s, 3H, C(CH<sub>3</sub>)<sub>2</sub>), 1.27 (s, 6H, 2 x C(CH<sub>3</sub>)<sub>2</sub>), 1.26 (s, 3H, C(CH<sub>3</sub>)<sub>2</sub>), 1.26 (s, 3H, C(CH<sub>3</sub>)<sub>2</sub>); <sup>13</sup>C NMR (100 MHz, CDCl<sub>3</sub>)  $\delta$  139.6 (C), 139.5 (C\*), 128.4 (CH x 2, CH\* x 2), 127.3 (CH x 2, CH\* x 2), 127.2 (CH), 127.2 (CH\*), 109.5 (C), 109.4 (C), 108.7 (C\* x 2), 96.2 (CH, CH\*), 70.7 (CH), 70.6 (CH\*), 70.5 (CH, CH\*), 70.4 (CH), 70.3 (CH\*), 67.3 (CH), 67.2 (CH\*), 66.7 (CH), 66.6 (CH\*), 65.3 (CH), 65.3 (CH\*), 64.8 (CH), 64.8 (CH), 53.2 (CH<sub>3</sub>), 53.1 (CH<sub>3</sub>\*), 45.2 (CH<sub>2</sub>, CH<sub>2</sub>\*), 25.8 (CH<sub>3</sub> x 2, CH<sub>3</sub>\* x 2), 24.8 (CH<sub>3</sub>), 24.8 (CH<sub>3</sub>\*), 24.3 (CH<sub>3</sub>), 24.3 (CH<sub>3</sub>\*); <sup>31</sup>P NMR (161.97 MHz, CDCl<sub>3</sub>):  $\delta$  10.8, 10.5; HRMS (ESI) calcd for C<sub>20</sub>H<sub>30</sub>NNaO<sub>8</sub>P [M+Na]<sup>+</sup> 466.1607, found 466.1608. Data in agreement with known literature.<sup>1</sup>

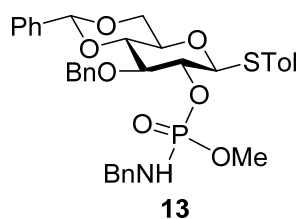

***p*-Toluenyl 3-*O*-benzyl-4,6-*O*-benzylidene-2-*O*-(methyl *N*-benzylphosphoramidyl)-thio- $\beta$ -D-glucopyranoside (**13**).**

$[\alpha]^{24}_{\text{D}} -34.3$  ( $c$  0.25,  $\text{CHCl}_3$ ); IR ( $\text{CHCl}_3$ )  $\nu$  2923, 1733, 1455, 1166, 1065, 1025, 746, 695  $\text{cm}^{-1}$ ;  $^1\text{H}$  NMR (400 MHz,  $\text{CDCl}_3$ ): 7.44 - 7.42 (m, 4H, ArH), 7.37-7.18 (m, 10 H, ArH), 7.15-7.10 (m, 4H, ArH), 5.54 (s, 1H,  $\text{CH}_2\text{Ph}$ ), 4.96 (d, 1H,  $J = 10.6$  Hz,  $\text{CH}_2\text{Ph}$ ), 4.72 (d,  $J = 9.6$  Hz, 1H, H-1), 4.68 (d,  $J = 10.6$  Hz, 1H,  $\text{CH}_2\text{Ph}$ ), 4.37 (dd,  $J = 5.0, 4.8$  Hz, 1H, H-6eq), 4.24 (dd,  $J = 10.2, 10.0$  Hz, 1H, H-2), 3.99 (m, 2H,  $\text{CH}_2$ ), 3.85(t,  $J = 9.0$  Hz, 1H, H-3), 3.76 (t,  $J = 10.2$  Hz, 1H, H-6ax), 3.68 (d,  $J = 11.4$  Hz, 3H,  $\text{CH}_3$ ), 3.67 (t,  $J = 9.6$  Hz, 1H, H-4), 3.49 (ddd,  $J = 5.2, 5.1, 5.0$  Hz, 1H, H-5), 3.03 (m, 1H, NH), 2.32 (s, 3H,  $\text{CH}_3$ );  $^{13}\text{C}$  NMR (100 MHz,  $\text{CDCl}_3$ ): 140.0 (d,  $J = 6.4$  Hz, C), 138.7 (C), 138.0 (C), 137.2 (C), 133.9 (CH), 129.9 (CH), 129.3(CH), 128.6 (CH), 128.5 (CH), 128.4 (CH), 128.3 (CH), 128.0 (CH), 127.5 (CH), 127.3 (CH), 126.2 (CH), 101.4 (CH), 87.7 (d,  $J = 6.0$  Hz, CH), 81.78 (CH), 81.57 (CH), 76.33 (d,  $J = 6.2$  Hz, CH), 74.94 ( $\text{CH}_2$ ), 70.40 (CH), 68.77 (CH), 53.86 (d,  $J = 5.4$  Hz, CH), 45.5 ( $\text{CH}_2$ ), 21.3 ( $\text{CH}_3$ );  $^{31}\text{P}$  NMR (161.97 MHz,  $\text{CDCl}_3$ ):  $\delta$  9.20; HRMS (ESI) calcd for  $\text{C}_{35}\text{H}_{38}\text{NO}_7\text{NaPS}$   $[\text{M}+\text{Na}]^+$  670.2004, found 670.2004.

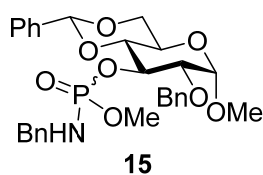

**Methyl 2-*O*-benzyl-4,6-*O*-benzylidene-3-*O*-(methyl *N*-benzylphosphoramidyl)- $\alpha$ -D-glucopyranoside (**15**).**

Colorless oil,  $[\alpha]^{26}_{\text{D}} 22.2$  ( $c$  0.5,  $\text{CHCl}_3$ ); IR ( $\text{CHCl}_3$ )  $\nu$  2927, 2868, 1496, 1453, 1375, 1254, 1088, 1027, 989, 865, 747, 698, 678  $\text{cm}^{-1}$ ;  $^1\text{H}$  NMR (400 MHz,  $\text{CDCl}_3$ )  $\delta$  7.43-4.41 (m, 1H, ArH), 7.43-4.41 (m, 1H, ArH\*), 7.38-7.31 (m, 3H, ArH), 7.38-7.31 (m, 3H, ArH\*), 7.30-7.16 (m, 9H, ArH), 7.30-7.16 (m, 9H, ArH\*), 7.11-7.05 (m, 2H, ArH), 7.11-7.05 (m, 2H, ArH\*), 5.45 (s, 1H, PhCH),

5.43 (s, 1H, PhCH\*), 4.79 (d,  $J = 11.8$  Hz, 1H, CH<sub>2</sub>Ph), 4.72 (d,  $J = 12.0$  Hz, 1H, CH<sub>2</sub>Ph\*), 4.74-4.65 (m, 4H, H-3, H-3\*, CH<sub>2</sub>Ph, CH<sub>2</sub>Ph\*), 4.62 (d,  $J = 5.5$  Hz, 1H, H-1), 4.57 (d,  $J = 5.5$  Hz, 1H, H-1\*), 4.25 (t,  $J = 4.6$  Hz, 1H, H-6eq), 4.22 (t,  $J = 4.6$  Hz, H-6eq\*), 4.01-3.88 (m, 4H, CH<sub>2</sub>, CH<sub>2</sub>\*), 3.84-3.77 (m, 2H, H-5, H-5\*), 3.674 (t,  $J = 10.0$  Hz, 1H, H-6ax), 3.672 (t,  $J = 10.0$  Hz, 1H, H-6ax\*), 3.62 (d,  $J = 11.2$  Hz, 3H, CH<sub>3</sub>), 3.62-3.57 (m, 4H, H-2, H-2\*, H-4, H-4\*), 3.51 (d,  $J = 11.4$  Hz, 3H, CH<sub>3</sub>\*), 3.35 (s, 6H, CH<sub>3</sub>, CH<sub>3</sub>\*); <sup>13</sup>C NMR (100 MHz, CDCl<sub>3</sub>) δ 139.8 (d,  $J = 6.0$  Hz, C, C\*), 137.6 (C, C\*), 137.4 (C, C\*), 136.8 (C, C\*), 136.6 (C, C\*), 129.2 (CH, CH\*), 128.5 (CH, CH\*), 128.3 (CH, CH\*), 128.17 (CH, CH\*), 128.10 (CH, CH\*), 127.3 (CH, CH\*), 127.0 (CH, CH\*), 126.2 (CH, CH\*), 126.0 (CH, CH\*), 102.04 (CH), 101.9 (CH\*), 98.8 (CH), 98.7 (CH\*), 80.42 (CH), 80.34 (CH\*), 78.6 (CH, CH\*), 75.72 (d,  $J = 7.0$  Hz, CH), 75.28 (d,  $J = 6.2$  Hz, CH\*), 73.60 (CH<sub>2</sub>\*), 73.23 (CH<sub>2</sub>), 68.91 (CH<sub>2</sub>, CH<sub>2</sub>\*), 62.18 (CH), 62.09 (CH\*), 55.40 (CH<sub>3</sub>), 53.62 (CH<sub>3</sub>\*), 53.55 (CH<sub>3</sub>), 53.50 (CH<sub>3</sub>\*), 45.0 (CH<sub>2</sub>, CH<sub>2</sub>\*); <sup>31</sup>P NMR (161.97 MHz, CDCl<sub>3</sub>): δ 9.8, 9.0; HRMS (ESI) calcd for C<sub>29</sub>H<sub>33</sub>NO<sub>8</sub>P [M-H]<sup>-</sup> 554.1948, found 554.1944.

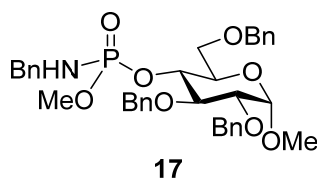

**Methyl 2,3,6-tri-O-benzyl-4-O-(methyl N-benzylphosphoramidyl)- $\alpha$ -D-glucopyranoside (17).**

Colorless oil,  $[\alpha]_D^{27}$  45.5 ( $c$  0.5, CHCl<sub>3</sub>); IR (CHCl<sub>3</sub>)  $\nu$  2922, 1722, 1453, 1248, 1026, 738, 697 cm<sup>-1</sup>; <sup>1</sup>H NMR (400 MHz, CDCl<sub>3</sub>) δ 7.36-7.19 (m, 18 H, ArH), 7.00 (d,  $J = 3.2$  Hz, 1H, ArH), 6.98 (d,  $J = 1.8$  Hz, 1H, ArH), 5.01 (d,  $J = 10.6$  Hz, 1H, CH<sub>2</sub>Ph), 4.72 (d,  $J = 12.0$  Hz, 1H, CH<sub>2</sub>Ph), 4.66 (d,  $J = 11.8$  Hz, 1H, CH<sub>2</sub>Ph), 4.62-4.59 (m, 3H, 1H, CH<sub>2</sub>Ph), 4.53 (d,  $J = 11.8$  Hz, 1H, CH<sub>2</sub>Ph), 4.25 (q,  $J = 9.5$  Hz, 1H, H-5), 3.94-3.87 (m, 3H, H-3, CH<sub>2</sub>Ph), 3.84-3.74 (m, 3H, H-4, H-6a, H-6b), 3.55 (m, 1H, H-2), 3.49 (d,  $J = 11.6$  Hz, 3H, CH<sub>3</sub>), 3.37 (s, 3H, OCH<sub>3</sub>), 3.22-3.16 (m, 1H, NH); <sup>13</sup>C NMR (100 MHz, CDCl<sub>3</sub>) δ 140.0 (d,  $J = 5.5$  Hz, C), 138.5 (C), 138.2 (C), 138.0 (C), 128.7 (CH), 128.5 (CH), 128.4 (CH), 128.3 (CH), 128.2 (CH), 128.14 (CH), 128.13 (CH), 128.0 (CH), 127.6 (CH), 127.5 (CH), 127.2 (CH), 97.86 (CH), 80.63 (CH), 80.13 (CH), 77.40 (CH), 76.0 (CH<sub>2</sub>), 73.74 (CH), 73.69 (CH), 73.60 (CH<sub>2</sub>), 73.37 (CH<sub>2</sub>), 69.84 (d,  $J = 4.0$  Hz, CH), 68.66 (CH<sub>2</sub>),

55.54 (CH), 45.48 (CH<sub>2</sub>) <sup>31</sup>P NMR (161.97 MHz, CDCl<sub>3</sub>): δ 10.4; HRMS (ESI) calcd for C<sub>36</sub>H<sub>42</sub>NO<sub>8</sub>NaP [M+Na]<sup>+</sup> 670.2546, found 670.2552.

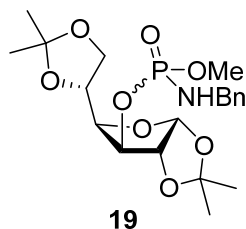

**1,2:5,6-di-O-isopropylidene-3-O-(methyl *N*-O-benzylphosphoramidyl)-D-glucopyranose (19).**

[α]<sup>32</sup><sub>D</sub> -27.6 (*c* 0.5, CHCl<sub>3</sub>); IR (CHCl<sub>3</sub>) ν 3227, 2987, 2936, 1454, 1374, 1250, 1218, 1195, 1072, 1027, 960, 843, 735 cm<sup>-1</sup>; <sup>1</sup>H NMR (400 MHz, CDCl<sub>3</sub>): δ 7.29 -7.21 (m, 10H, ArH), 5.85 (d, 1H, *J* = 3.6 Hz, H-1), 5.76 (d, *J* = 3.6 Hz, 1H, H-1\*), 4.81 (d, *J* = 3.6 Hz, 1H, H-2), 4.74 (m, 2H, H-3, H-3\*), 4.66 (d, *J* = 3.6 Hz, 1H, H-2\*), 4.20-3.99 (m, 10H, H-4, H-4\*, H-5, H-5\*, H-6a, H-6a\*, PhCH<sub>2</sub>, PhCH<sub>2</sub>\*), 3.95-3.91 (m, 2H, H-6b, H-6b\*), 3.69 (d, *J* = 11.2 Hz, 3H, OCH<sub>3</sub>), 3.65 (d, *J* = 11.2 Hz, 3H, OCH<sub>3</sub>), 3.60 (m, 2H), 1.45 (s, 3H, C(CH<sub>3</sub>)<sub>2</sub>), 1.43 (s, 3H, C(CH<sub>3</sub>)<sub>2</sub>), 1.30 (s, 3H, C(CH<sub>3</sub>)<sub>2</sub>), 1.26 (s, 3H, C(CH<sub>3</sub>)<sub>2</sub>), 1.22 (s, 3H, C(CH<sub>3</sub>)<sub>2</sub>), 1.20 (s, 3H, C(CH<sub>3</sub>)<sub>2</sub>), 1.17 (s, 3H, C(CH<sub>3</sub>)<sub>2</sub>), 1.12 (s, 3H, C(CH<sub>3</sub>)<sub>2</sub>); <sup>13</sup>C NMR (100 MHz, CDCl<sub>3</sub>): δ 139.5 (d, *J* = 4.9 Hz, C, C\*), 128.7 (CH x 2, CH\* x 2), 127.76 (CH x 2, CH\* x 2), 127.4 (CH, CH\*), 112.3 (d, *J* = 11.4, C, C\*), 109.4 (d, *J* = 10.0 C, C\*), 105.3 (CH), 105.2 (CH\*), 83.9 (CH), 83.7 (CH\*), 80.8 (d, *J* = 8.3 Hz, CH, CH\*), 79.53 (d, *J* = 6.0 Hz, CH), 78.5 (d, *J* = 4.1 Hz, CH), 72.5 (CH), 72.3 (CH\*), 67.6 (CH<sub>2</sub>), 67.5 (CH<sub>2</sub>\*), 53.5 (d, *J* = 4.5 Hz, CH<sub>3</sub>, CH<sub>3</sub>\*), 45.4 (CH<sub>2</sub>), 45.3 (CH<sub>2</sub>\*), 26.9 (CH<sub>3</sub>), 26.8 (CH<sub>3</sub>, CH<sub>3</sub>\*), 26.7 (CH<sub>3</sub>), 26.3 (CH<sub>3</sub>, CH<sub>3</sub>\*), 25.3 (CH<sub>3</sub>, CH<sub>3</sub>\*); <sup>31</sup>P NMR (161.98 MHz, CDCl<sub>3</sub>): δ 10.5, 9.2; HRMS (ESI) calcd for C<sub>20</sub>H<sub>31</sub>NO<sub>8</sub>P [M+H]<sup>+</sup> 444.1787, found 444.1786. Data in agreement with known literature.<sup>1</sup>

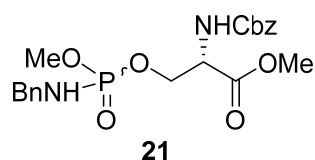

**Methyl *O*-((benzylamino)(methoxy)phosphoryl)-*N*-((benzyloxy)carbonyl)-L-serinate (21).**



$[\alpha]^{32}_{\text{D}}$  17.2 (*c* 0.5,  $\text{CHCl}_3$ ); IR ( $\text{CHCl}_3$ )  $\nu$  3247, 2962, 2924, 1721, 1514, 1455, 1438, 1344, 1317, 1218, 1050, 1017, 973, 917, 874, 739, 659  $\text{cm}^{-1}$ ;  $^1\text{H}$  NMR (400 M Hz,  $\text{CDCl}_3$ ):  $\delta$  7.37-7.26 (m, 10H, ArH), 6.10 (d,  $J = 8.0$  Hz, 1H, NHCH), 5.11 (d,  $J = 5.0$  Hz, 2H,  $\text{CH}_2\text{Cbz}$ ), 4.55 (d,  $J = 7.2$  Hz, 1H, CHCH<sub>2</sub>), 4.44-4.26 (m, 2H, CHCH<sub>2</sub>), 4.03 (d,  $J = 11.0$  Hz, 2H,  $\text{CH}_2\text{Ph}$ ), 3.64 (d,  $J = 7.0$  Hz, 3H, OCH<sub>3</sub>), 3.64 (t,  $J = 11.2$  Hz, 3H, OCH<sub>3</sub>), 3.21 (br, 1H, NH);  $^{13}\text{C}$  NMR (100 MHz,  $\text{CDCl}_3$ ):  $\delta$  169.8 (C), 156.1 (C), 139.4 (C\*), 139.3 (C), 136.4 (C\*) 128.8 (CH, CH\*), 128.6 (CH, CH\*), 128.3 (CH, CH\*), 128.2 (CH, CH\*), 127.7 (CH, CH\*), 127.4 (CH, CH\*), 67.28 (CH<sub>2</sub>), 66.30 (CH<sub>2</sub>), 66.24 (CH<sub>2</sub>\*), 54.81 (CH), 54.75 (CH\*), 53.60 (CH<sub>3</sub>), 53.54 (CH<sub>3</sub>\*), 53.45 (CH<sub>3</sub>), 52.90 (CH<sub>3</sub>\*), 45.46 (CH<sub>2</sub>, CH<sub>2</sub>\*);  $^{31}\text{P}$  NMR (161.98 MHz,  $\text{CDCl}_3$ ):  $\delta$  10.8, 10.6

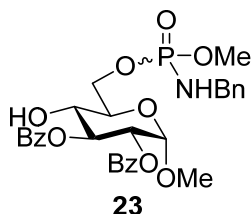

**Methyl 2,3-di-O-benzoyl-6-O-(methyl N-benzylphosphoramidyl)- $\alpha$ -D-glucopyranoside (23).**

$[\alpha]^{32}_{\text{D}}$  115.9 (*c* 0.5,  $\text{CHCl}_3$ ); IR ( $\text{CHCl}_3$ )  $\nu$  3331, 2381, 2341, 1724, 1801, 1452, 1278, 1098, 1069, 1026, 917, 864, 754, 710, 619  $\text{cm}^{-1}$ ;  $^1\text{H}$  NMR (400 M Hz,  $\text{CDCl}_3$ ):  $\delta$  7.96-7.93 (m, 4H, ArH), 7.96-7.93 (m, 4H, ArH\*), 7.48-7.42 (m, 2H, ArH), 7.48-7.42 (m, 2H, ArH\*), 7.34-7.24 (m, 9H, ArH), 7.34-7.24 (m, 9H, ArH\*) 5.83-5.77 (m, 2H, H-3, H-3\*), 5.16-5.09 (m, 4H, H-1, H-1\*, H-2, H-2\*), 4.44-4.35 (2H, H-6a, H-6b), 4.23 (dddd,  $J = 7.5, 7.4, 2.2, 2.1$  Hz, 1H, H-6b\*), 4.13-4.06 (m, 5H,  $\text{CH}_2\text{Ph}$ ,  $\text{CH}_2\text{Ph}^*$ , H-6a\*), 3.94-3.81 (m, 4H, H-4, H-4\*, H-5, H-5\*), 3.7 (d,  $J = 11.2$  Hz, 3H, CH<sub>3</sub>), 3.64 (d,  $J = 11.2$  Hz, 3H, CH<sub>3</sub>\*), 3.36 (s, 3H, OMe), 3.35 (s, 3H, OMe\*), 3.15 (br, 2H, OH, OH\*),  $^{13}\text{C}$  NMR (100 MHz,  $\text{CDCl}_3$ ):  $\delta$  166.7 (C, C\*), 166.1 (C, C\*), 139.6 (C) 139.5 (C\*), 139.47 (C), 139.42 (C\*), 133.4 (CH, CH\*), 133.1 (CH, CH\*), 130.0 (CH, CH\*), 129.9 (CH, CH\*), 129.3 (CH, CH\*), 128.8 (CH, CH\*), 128.5 (CH, CH\*), 128.4 (CH, CH\*), 127.6 (CH, CH\*), 127.54 (CH, CH\*), 127.51 (CH, CH\*), 97.44 (CH, CH\*), 97.38 (CH, CH\*), 73.1 (CH, CH\*), 72.9 (CH, CH\*), 72.1 (CH, CH\*), 70.92 (CH, CH\*), 70.88 (CH, CH\*), 68.6 (CH, CH\*), 68.4 (CH, CH\*), 65.4 (d,  $J = 5.0$  Hz, CH<sub>2</sub>, CH<sub>2</sub>\*), 64.8 (d,  $J = 4.0$  Hz, CH<sub>2</sub>, CH<sub>2</sub>\*), 55.6 (CH<sub>3</sub>), 53.6 (CH<sub>3</sub>\*), 53.6 (d,  $J = 5.6$  Hz, CH<sub>3</sub>), 53.5 (d,  $J = 5.6$  Hz, CH<sub>3</sub>\*), 45.5 (CH<sub>2</sub>), 45.4 (CH<sub>2</sub>\*);  $^{31}\text{P}$  NMR (161.98 MHz,  $\text{CDCl}_3$ )  $\delta$  12.1, 12.0; HRMS (ESI) calcd for  $\text{C}_{29}\text{H}_{32}\text{NO}_{10}\text{NaP}$   $[\text{M}+\text{Na}]^+$  608.1662, found 608.1651.

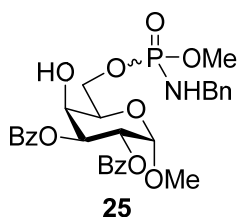

**Methyl 2,3-di-*O*-benzoyl-6-*O*-(methyl *N*-benzylphosphoramidyl)- $\alpha$ -D-galactopyranoside (25).**

Colorless oil,  $[\alpha]_D^{26}$  141.5 (*c* 0.5, CHCl<sub>3</sub>); IR (CHCl<sub>3</sub>)  $\nu$  3342, 1719, 1451, 1315, 1279, 1051, 1026, 912, 710 cm<sup>-1</sup>; <sup>1</sup>H NMR (400 MHz, CDCl<sub>3</sub>)  $\delta$  7.99-7.93 (m, 4H, ArH), 7.99-7.93 (m, 4H, ArH\*), 7.46 (td, *J* = 7.2, 1.2 Hz, 2H, ArH), 7.46 (td, *J* = 7.2, 1.2 Hz, 2H, ArH\*), 7.34-7.22 (m, 9H, ArH), 7.34-7.22 (m, 9H, ArH\*), 5.69-5.60 (m, 2H, H-2, H-3), 5.69-5.60 (m, 2H, H-2\*, H-3\*), 5.13 (s, 1H, H-1), 5.12 (s, 1H, H-1\*), 4.37 (t, *J* = 3.6 Hz, 1H, H-4), 4.33 (t, *J* = 4.4 Hz, 1H, H-4\*), 4.31-4.23 (m, 1H, H-6a), 4.31-4.23 (m, 1H, H-6a\*), 4.13 (t, *J* = 7.2 Hz, 1H, H-6b), 4.13 (t, *J* = 7.2 Hz, 1H, H-6b\*), 4.06-3.99 (m, 3H, CH<sub>2</sub>, H-5), 4.06-3.99 (m, 3H, CH<sub>2</sub>\*, H-5\*), 3.84 (d, *J* = 4.7 Hz, 1H, OH), 3.68 (d, *J* = 4.8 Hz, 1H, OH\*), 3.65 (d, *J* = 11.3 Hz, 3H, CH<sub>3</sub>), 3.65 (d, *J* = 11.3 Hz, 3H, CH<sub>3</sub>\*), 3.37 (s, 3H, OCH<sub>3</sub>), 3.37 (s, 3H, OCH<sub>3</sub>\*), 3.27-3.16 (m, 1H, NH), 3.27-3.16 (m, 1H, NH\*); <sup>13</sup>C NMR (100 MHz, CDCl<sub>3</sub>)  $\delta$  166.0 (C), 165.9 (C), 139.3 (C), 139.2 (C, C\*), 139.1 (C\*), 133.1 (CH, CH\*), 129.8 (CH, CH\*), 129.6 (CH, CH\*), 129.5 (CH, CH\*), 128.6 (CH, CH\*), 128.3 (CH, CH\*), 127.5 (CH, CH\*), 127.3 (CH, CH\*), 97.64 (CH, CH\*), 70.5 (CH, CH\*), 70.4 (CH, CH\*), 69.0 (CH, CH\*), 68.54 (CH, CH\*), 68.47 (CH, CH\*), 68.41 (CH, CH\*), 68.3 (CH, CH\*), 67.1 (CH, CH\*), 67.0 (CH, CH\*), 64.2 (d, *J* = 4.8 Hz, CH<sub>2</sub>, CH<sub>2</sub>\*), 63.9 (d, *J* = 3.8 Hz, CH<sub>2</sub>, CH<sub>2</sub>\*), 55.5 (CH<sub>3</sub>, CH<sub>3</sub>\*), 53.4 (CH<sub>3</sub>), 53.3 (CH<sub>3</sub>\*), 45.3 (CH<sub>2</sub>, CH<sub>2</sub>\*); <sup>31</sup>P NMR (161.97 MHz, CDCl<sub>3</sub>):  $\delta$  11.7, 11.4; HRMS (ESI) calcd for C<sub>29</sub>H<sub>32</sub>NNaO<sub>10</sub>P [M+Na]<sup>+</sup> 608.1662, found 608.1664.

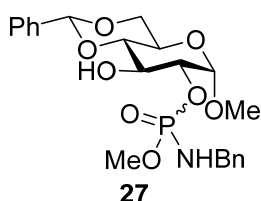

**Methyl 2-*O*-(methyl *N*-benzylphosphoramidyl)-4,6-*O*-benzylidene- $\alpha$ -D-glucopyranoside (27).**

Colorless oil,  $[\alpha]_D^{26}$  55.7 (*c* 0.5, CHCl<sub>3</sub>); IR (CHCl<sub>3</sub>)  $\nu$  3267, 2934, 1453, 1375, 1215, 1147, 1067, 1042, 991, 933, 915, 889, 747, 698, 674 cm<sup>-1</sup>; <sup>1</sup>H NMR (400 MHz, CDCl<sub>3</sub>)  $\delta$  7.48-7.45 (m, 2H,

ArH), 7.36-7.21 (m, 8H, ArH), 5.50 (s, 1H, PhCH), 4.91 (d,  $J = 3.6$  Hz, 1H, H-1), 4.28-4.21 (m, 2H, H-2, H-6eq), 4.18-4.04 (m, 3H, H-3, CH<sub>2</sub>), 3.83 (td,  $J = 10.8, 4.6$  Hz, 1H, H-5), 3.71 (t,  $J = 10.2$  Hz, 1H, H-6ax), 3.68 (d,  $J = 11.4$  Hz, 3H, CH<sub>3</sub>), 3.64 (br, 1H, NH), 3.48 (t,  $J = 9.2$  Hz, 1H, H-4), 3.41 (s, 3H, OCH<sub>3</sub>), 3.35-3.29 (m, 1H, OH); <sup>13</sup>C NMR (100 MHz, CDCl<sub>3</sub>) δ 139.4 (C), 137.0 (C x 2), 129.1 (CH), 128.5 (CH x 2), 128.2 (CH x 2), 127.4 (CH x 3), 126.3 (CH x 2), 101.9 (PhCH), 98.9 (CH), 81.2 (CH), 69.5 (CH), 69.4 (CH), 68.9 (CH<sub>2</sub>), 62.0 (CH), 55.5 (OCH<sub>3</sub>), 53.4 (CH<sub>3</sub>), 45.4 (CH<sub>2</sub>); <sup>31</sup>P NMR (161.97 MHz, CDCl<sub>3</sub>): δ 11.5, 11.0; HRMS (ESI) calcd for C<sub>22</sub>H<sub>28</sub>NNaO<sub>8</sub>P [M+Na]<sup>+</sup> 488.1450, found 488.1444.

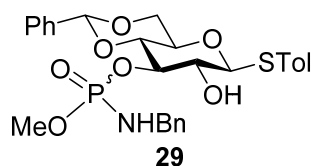

**p-toluenyl 3-O-(methyl N-benzylphosphoramidyl)-4,6-O-benzylidene-thio-β-D-glucopyranoside (29).**

$[\alpha]^{32}_D -38.6$  ( $c$  0.5, CHCl<sub>3</sub>); IR (CHCl<sub>3</sub>)  $\nu$  3314, 2923, 2889, 2360, 1493, 1454, 1383, 1314, 1218, 1086, 1016, 891, 868, 809. 760, 699 cm<sup>-1</sup>; <sup>1</sup>H NMR (400 MHz, CD<sub>3</sub>OD): δ 7.46-7.42 (m, 4H, ArH), 7.33-7.28 (m, 3H, ArH), 7.22-7.10 (m, 7H, ArH), 5.53 (s, 1H, PhCH), 4.67 (d,  $J = 9.8$  Hz, 1H, H-1), 4.44 (q,  $J = 8.7, 8.7$  Hz, 1H, H-3), 4.28 (dd,  $J = 10.3, 4.8$  Hz, 1H, H-6eq), 3.90 (d,  $J = 11.0$  Hz, 2H, CH<sub>2</sub>), 3.73 (t,  $J = 11.4$  Hz, 1H, H-6ax), 3.62 (d,  $J = 11.4$  Hz, 3H, OMe), 3.60 (t,  $J = 9.1$  Hz, 1H, H-4), 3.54-3.51 (m, 1H, H-5), 3.47 (t,  $J = 9.0$  Hz, 1H, H-2), 2.33 (s, 3H, CH<sub>3</sub>); <sup>13</sup>C NMR (100 MHz, CD<sub>3</sub>OD): δ 141.3 (C), 141.3 (C), 139.5 (C), 138.7 (C), 134.5 (CH), 130.6 (CH), 130.1 (CH), 129.8 (CH), 129.3 (CH), 129.1 (CH), 128.3 (CH), 127.9 (CH), 127.5 (CH), 102.9 (CH), 89.89 (CH), 81.47 (d,  $J = 6.0$  Hz, CH), 80.41 (d,  $J = 2.0$  Hz, CH), 73.19 (CH), 71.29 (CH), 69.46 (CH<sub>2</sub>), 54.23 (d,  $J = 5.9$  Hz, CH<sub>3</sub>), 45.75 (CH<sub>2</sub>), 21.16 (CH<sub>3</sub>); <sup>31</sup>P NMR (161.98 MHz, CD<sub>3</sub>OD): δ 11.4, 10.7; HRMS (ESI) calcd for C<sub>28</sub>H<sub>32</sub>NO<sub>7</sub>NaSP [M+Na]<sup>+</sup> 580.1535, found 580.1542.

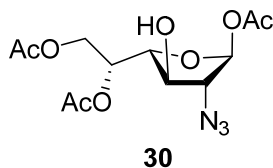

**1,5,6-Tri-O-acetyl-2-azido-2-deoxy-D-galactofuranose (30).**

Colorless oil,  $[\alpha]_D^{20}$  -73.9 (*c* 0.5, CHCl<sub>3</sub>); IR (CHCl<sub>3</sub>)  $\nu$  2105, 1731, 1370, 1214, 1003, 928 cm<sup>-1</sup>; <sup>1</sup>H NMR (400 MHz, CDCl<sub>3</sub>);  $\delta$  6.0 (d, *J* = 2.3 Hz, 1H, H-1), 5.26-5.24 (m, 1H, H-5), 4.31-4.18 (m, 2H, H6a, H6b), 4.14, (dd, *J* = 7.0, 3.3 Hz, 1H, H-4), 4.0 (dd, *J* = 5.0, 2.3 Hz, 1H, H-2), 3.94-3.89 (m, 1H, H-3), 3.39 (d, *J* = 5.0 Hz, 1H, OH), 2.12 (s, 3H, CH<sub>3</sub>), 2.09 (s, 3H, CH<sub>3</sub>), 2.02 (s, 3H, CH<sub>3</sub>); <sup>13</sup>C NMR (100 MHz, CDCl<sub>3</sub>)  $\delta$  171.3 (CO), 170.8 (CO), 169.6 (CO), 99.5 (CH), 82.57 (CH), 75.62 (CH), 71.34 (CH), 69.24 (CH), 62.81 (CH<sub>2</sub>), 21.0 (CH<sub>3</sub>), 20.81 (CH<sub>3</sub>), 20.67 (CH<sub>3</sub>); (HR-ESI) calcd for C<sub>12</sub>H<sub>17</sub>N<sub>3</sub>O<sub>8</sub>Na [M+Na]<sup>+</sup> 354.0913, found 354.0914.

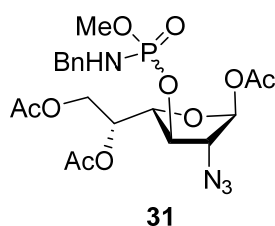

**1,5,6-tri-*O*-acetyl-2-azido-2-deoxy-3-*O*-(methyl-*N*-benzylphosphoramidyl)- $\beta$ -D-galactofuranose (31).**

Colorless oil,  $[\alpha]_D^{20}$  -74.6 (*c* 0.5, CHCl<sub>3</sub>); IR (CHCl<sub>3</sub>)  $\nu$  2116, 1749, 1454, 1220, 1033, 969, 772 cm<sup>-1</sup>; <sup>1</sup>H NMR (400 MHz, CDCl<sub>3</sub>);  $\delta$  7.34-7.24 (m, 10H, ArH), 6.08 (s, 2H, H-1, H-1\*), 5.35-5.27 (m, 2H, H-5, H-5\*), 4.48 (ddd, *J* = 12.9, 7.5, 2.7 Hz, 2H, H-3, H-3\*), 4.33 (ddd, *J* = 8.8, 5.5, 3.5 Hz, 2H, H-4, H-4\*), 4.30-4.23 (m, 3H, H-2, H-2\*, H6a), 4.19-4.13 (m, 3H, H6a\*, H6b, H6b\*), 4.08 (dd, *J* = 10.8, 7.0 Hz, 4H, CH<sub>2</sub>, CH<sub>2</sub>\*), 3.7 (d, *J* = 11.2 Hz, 3H, CH<sub>3</sub>), 3.69 (d, *J* = 11.1 Hz, 3H, CH<sub>3</sub>\*), 3.33-3.23 (m, 2H, NH, NH\*), 2.09 (s, 3H, CH<sub>3</sub>), 2.07 (s, 3H, CH<sub>3</sub>\*), 2.06 (s, 3H, CH<sub>3</sub>), 2.05 (s, 3H, CH<sub>3</sub>\*), 2.01 (s, 6H, CH<sub>3</sub>, CH<sub>3</sub>\*); <sup>13</sup>C NMR (100 MHz, CDCl<sub>3</sub>)  $\delta$  170.5 (C, C\*), 170.4 (C), 170.2 (C\*), 169.3 (C, C\*), 139.0 (d, *J* = 5.1 Hz, C), 128.6 (CH, CH\*, CH, CH\*), 127.6 (CH, CH\*), 127.4 (CH, CH\*), 127.3 (CH, CH\*), 99.92 (d, *J* = 5.6 Hz, CH), 83.0 (d, *J* = 6.5 Hz, CH\*), 82.8 (d, *J* = 8.2 Hz, CH), 78.71 (CH, CH\*), 70.61 (d, *J* = 1.7 Hz, CH), 70.35 (d, *J* = 3.8 Hz, CH\*), 68.71 (d, *J* = 8.3 Hz, CH<sub>2</sub>), 62.58 (d, *J* = 6.5 Hz, CH<sub>2</sub>\*), 53.43 (d, *J* = 3.5 Hz, CH<sub>3</sub>, CH<sub>3</sub>\*), 45.36 (CH<sub>2</sub>, CH<sub>2</sub>\*), 20.92 (CH<sub>3</sub>, CH<sub>3</sub>\*), 20.69 (CH<sub>3</sub>, CH<sub>3</sub>\*), 20.65 (CH<sub>3</sub>, CH<sub>3</sub>\*); <sup>31</sup>P NMR (161.97 MHz, CDCl<sub>3</sub>):  $\delta$  9.7, 9.5; (HR-ESI) calcd for C<sub>20</sub>H<sub>27</sub>N<sub>4</sub>O<sub>10</sub>PNa [M+Na]<sup>+</sup> 537.1363, found 537.1364.

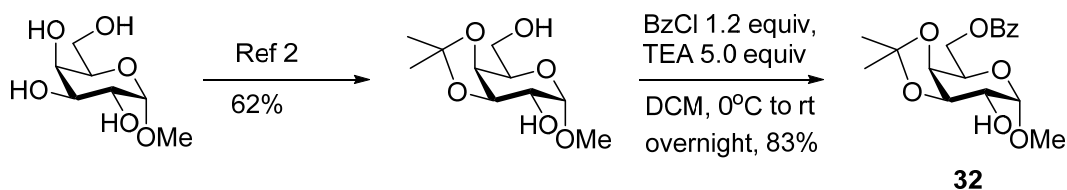

Methyl 3,4-*O*-Isopropylidene- $\alpha$ -D-galactopyranoside prepared by known protocol. Data is in agreement with the literature<sup>2</sup>.

**Methyl 3,4-*O*-Isopropylidene-6-*O*-benzoyl- $\alpha$ -D-galactopyranoside (32).**

Colorless oil,  $[\alpha]_{\text{D}}^{27}$  90.3 (*c* 0.5, CHCl<sub>3</sub>); IR (CHCl<sub>3</sub>)  $\nu$  2986, 2838, 2360, 1717, 1315, 1380, 1023, 988, 709 cm<sup>-1</sup>; <sup>1</sup>H NMR (400 MHz, CDCl<sub>3</sub>);  $\delta$  8.0 (d, *J* = 7.8 Hz, 2H, ArH), 7.54 (t, *J* = 7.5 Hz, 1H, ArH), 7.42 (t, *J* = 7.58 Hz, 2H, ArH), 4.7 (d, *J* = 3.9 Hz, 1H, H-1), 4.58-4.49 (m, 2H, CH<sub>2</sub>), 4.32-4.25 (m, 3H, H-3, H-4, H-5), 3.86 (dd, *J* = 9.2, 5.0 Hz, 1H, H-2), 3.42 (s, 3H, OCH<sub>3</sub>), 2.46 (d, *J* = 5.2 Hz, 1H, OH), 1.49 (s, 3H, CH<sub>3</sub>), 1.33 (s, 3H, CH<sub>3</sub>); <sup>13</sup>C NMR (100 MHz, CDCl<sub>3</sub>)  $\delta$  166.5 (CO), 133.2 (CH), 130.2 (C), 129.8 (CH), 128.6 (CH), 110.1 (C), 98.2 (CH), 76.0 (CH), 73.2 (CH), 69.0 (CH), 66.8 (CH), 64.3 (CH<sub>2</sub>), 55.5 (CH<sub>3</sub>), 27.7 (CH<sub>3</sub>), 26.0 (CH<sub>3</sub>); (HR-ESI) calcd for C<sub>17</sub>H<sub>22</sub>O<sub>7</sub>Na [M+Na]<sup>+</sup> 361.1263, Found 361.1272.

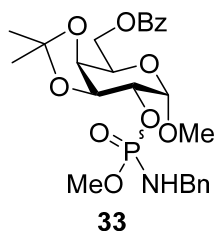

**Methyl 2-*O*-(methyl *N*-benzylphosphoramidyl)-3,4-*O*-isopropylidene- $\alpha$ -D-galactopyranoside (33).**

Colorless oil,  $[\alpha]_{\text{D}}^{27}$  92.6 (*c* 0.5, CHCl<sub>3</sub>); IR (CHCl<sub>3</sub>)  $\nu$  2986, 2936, 2359, 1718, 1315, 1270, 1020, 932, 821, 710 cm<sup>-1</sup>; <sup>1</sup>H NMR (400 MHz, CDCl<sub>3</sub>);  $\delta$  8.03 (d, *J* = 7.5 Hz, 4H, ArH), 7.55 (t, *J* = 7.6 Hz, 2H, ArH), 7.42 (t, *J* = 7.8 Hz, 4H, ArH), 7.32-7.24 (m, 10 H, ArH), 4.98 (d, *J* = 3.2 Hz, 1H, H-1), 4.91 (d, *J* = 3.4 Hz, 1H, H-1\*), 4.62-4.5 (m, 4H, CH<sub>2</sub>, CH<sub>2</sub>\*), 4.43 (ddd, *J* = 16.0, 8.0, 3.5 Hz, 1H, H-2\*), 4.39-4.26 (m, 7H, H-2, H-3, H-3\*, H-4, H-4\*, H-5, H-5\*), 4.18-4.08 (m, 4H, CH<sub>2</sub>, CH<sub>2</sub>\*), 3.7 (d, *J* = 11.0 Hz, 3H, CH<sub>3</sub>), 3.67 (d, *J* = 11.7 Hz, 3H, CH<sub>3</sub>\*), 3.40 (s, 3H, CH<sub>3</sub>), 3.34 (s, 3H, CH<sub>3</sub>\*), 3.13-3.05 (m, 2H, NH, NH\*), 1.52 (s, 3H, CH<sub>3</sub>), 1.46 (s, 3H, CH<sub>3</sub>\*), 1.33 (s, 3H, CH<sub>3</sub>),

1.32 (s, 3H, CH<sub>3</sub>\*); <sup>13</sup>C NMR (100 MHz, CDCl<sub>3</sub>) δ 166.52 (CO), 139.8 (C), 139.7 (C, C\*), 139.6 (C\*), 133.3 (CH, CH\*, CH), 130.2 (CH\*), 129.8 (CH, CH\*, CH, CH\*), 128.7 (CH, CH\*, CH, CH\*), 128.6 (CH, CH\*, CH, CH\*), 127.7 (CH, CH\*), 127.5 (CH, CH\*), 110.2 (C), 110.17 (C\*), 98.54 (CH), 98.28 (CH\*), 75.0 (d, *J* = 6.0 Hz, CH), 74.89 (d, *J* = 6.4 Hz, CH\*), 74.79 (CH), 74.74 (CH\*), 73.93 (CH, CH\*), 66.03 (CH), 65.76 (CH\*), 64.15 (CH<sub>2</sub>, CH<sub>2</sub>\*), 55.86 (CH<sub>3</sub>), 55.76 (CH<sub>3</sub>\*), 53.62 (d, *J* = 5.5 Hz, CH<sub>3</sub>), 53.45 (d, *J* = 5.25 Hz, CH<sub>3</sub>), 45.67 (CH<sub>2</sub>), 45.58 (CH<sub>2</sub>\*), 28.18 (CH<sub>3</sub>), 28.06 (CH<sub>3</sub>\*), 26.56 (CH<sub>3</sub>, CH<sub>3</sub>\*); <sup>31</sup>P NMR (161.97 MHz, CDCl<sub>3</sub>): δ 10.7, 9.7; (HR-ESI) calcd for C<sub>25</sub>H<sub>32</sub>NO<sub>9</sub>NaP [M+Na]<sup>+</sup> 544.1712, Found 544.1708.

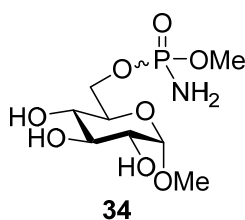

**Methyl 6-*O*-(methyl phosphoramidyl)- $\alpha$ -D-glucopyranoside (34).**

To a solution of compound **6** (25 mg, 0.041 mmol) in EtOH (0.6 mL) was added Pd(OH)<sub>2</sub> (120 mg) and stirred reaction mixture overnight under H<sub>2</sub> atmosphere.<sup>3</sup> Reaction was monitored by TLC. The reaction was diluted with EtOH and filtered through a celite bed. The bed was washed with EtOH (2mL). The EtOH was concentrated under a reduced pressure and dried under high vacuum to afford desired compound **36** quantitatively (11 mg).

Colorless oil, <sup>1</sup>H NMR (500 MHz, CD<sub>3</sub>OD); δ 4.67 (d, *J* = 3.4 Hz, 2H, H-1, H-1\*), 4.23 (ddd, *J* = 11.0, 6.2, 1.7 Hz, 2H, H-6a, H6a\*), 4.16-4.11 (m, 2H, H-6b, H-6b\*), 3.71 (d, *J* = 11.4 Hz, 3H, CH<sub>3</sub>), 3.71 (d, *J* = 11.3 Hz, CH<sub>3</sub>\*), 3.69-3.66 (m, 2H, H-5, H-5\*), 3.61 (t, *J* = 9.2 Hz, 2H, H-3, H-3\*), 3.40 (m, 8H, H-2, H-2\*, CH<sub>3</sub>, CH<sub>3</sub>\*), 3.34-3.32 (m, 2H, H-4, H-4\*); <sup>13</sup>C NMR (125 MHz, CD<sub>3</sub>OD) δ 101.3 (CH, CH\*), 70.98 (CH, CH\*), 73.45 (CH, CH\*), 72.03 (CH, CH\*), 71.33 (CH, CH\*), 72.05 (d, *J* = 6.3 Hz, CH), 72.01 (d, *J* = 3.8 Hz, CH\*), 66.85 (d, *J* = 5.4 Hz, CH<sub>2</sub>), 66.80 (d, *J* = 5.3 Hz, CH<sub>2</sub>\*), 55.65 (CH<sub>3</sub>, CH<sub>3</sub>\*), 53.76 (CH<sub>3</sub>), 53.72 (CH<sub>3</sub>\*); <sup>31</sup>P NMR (202.44 MHz, CD<sub>3</sub>OD): δ 13.9 (HR-ESI) calcd for C<sub>8</sub>H<sub>18</sub>NO<sub>8</sub>NaP [M+Na]<sup>+</sup> 310.0668, Found 310.0659. Data in agreement with known literature.<sup>1</sup>

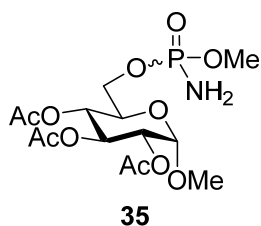

**Methyl 2,3,4-tri-*O*-acetyl-6-*O*-(methyl phosphoramidyl)- $\alpha$ -D-glucopyranoside (35).**

To a solution of compound **8** (30 mg, 0.059 mmol) in ethyl acetate: H<sub>2</sub>O (1:0.7 mL) was added NaBrO<sub>3</sub> (27 mg, 0.178 mmol, 3 equiv) and Na<sub>2</sub>S<sub>2</sub>O<sub>4</sub> (31 mg, 0.178 mmol, 3 equiv). The reaction mixture was stirred vigorously for 2 h at room temperature. The reaction was monitored by TLC. Upon completion the reaction mixture was diluted with ethyl acetate (5 mL) and washed with brine. The organic layer was dried over MgSO<sub>4</sub>, concentrated and purified through column chromatography (CHCl<sub>3</sub>/MeOH = 19/1) to afford desired compound as a colorless oil (19 mg, 76%).

Colorless oil,  $[\alpha]^{28}_D$  1.7 (*c* 0.5, CHCl<sub>3</sub>); <sup>1</sup>H NMR (400 MHz, CDCl<sub>3</sub>):  $\delta$  5.48-5.42 (m, 2H, H-3, H-3\*), 5.09 (td, *J* = 11.2, 1.6 Hz, 2H, H-4, H-4\*), 4.94 (s, 1H, H-1), 4.93 (s, 1H, H-1\*), 4.87 (t, *J* = 2.8 Hz, 1H, H-2), 4.84 (t, *J* = 2.8 Hz, 1H, H-2\*), 4.13-4.08 (m, 4H, H6a, H6a\*, H6b, H6b\*), 3.96-3.94 (m, 2H, H-5, H-5\*), 3.73 (d, *J* = 11.5 Hz, 3H, CH<sub>3</sub>), 3.72 (d, *J* = 11.4 Hz, 3H, CH<sub>3</sub>\*), 3.39 (s, 6H, CH<sub>3</sub>, CH<sub>3</sub>\*), 2.82 (bs, 4H, NH<sub>2</sub>, NH<sub>2</sub>\*), 2.05 (s, 6H, CH<sub>3</sub>, CH<sub>3</sub>\*), 2.02 (s, 3H, CH<sub>3</sub>), 2.01 (s, 3H, CH<sub>3</sub>\*), 1.98 (s, 6H, CH<sub>3</sub>, CH<sub>3</sub>\*); <sup>13</sup>C NMR (100 MHz, CDCl<sub>3</sub>)  $\delta$  170.1 (C, C\*), 170.06 (C, C\*), 170.00 (C), 169.6 (C\*), 96.84 (CH, CH\*), 70.78 (CH, CH\*), 70.16 (CH, CH\*), 68.47 (CH), 68.34 (CH\*), 67.86 (CH), 67.75 (CH\*), 64.34 (d, *J* = 4.1 Hz, CH<sub>2</sub>), 64.20 (d, *J* = 4.1 Hz, CH<sub>2</sub>\*), 55.56 (CH<sub>3</sub>), 55.53 (CH<sub>3</sub>\*), 20.64 (CH<sub>3</sub>, CH<sub>3</sub>, CH<sub>3</sub>), 20.61 (CH<sub>3</sub>\*, CH<sub>3</sub>\*, CH<sub>3</sub>\*); <sup>31</sup>P NMR (161.97 MHz, CDCl<sub>3</sub>):  $\delta$  11.5, 10.9; (HR-ESI) calcd for C<sub>14</sub>H<sub>24</sub>NO<sub>11</sub>NaP [M+Na]<sup>+</sup> 436.0985, Found 436.0976.

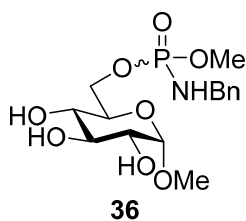

**Methyl 6-*O*-(methyl *N*-benzylphosphoramidyl)- $\alpha$ -D-glucopyranoside (36).**

Compound **8** (50 mg, 0.099 mmol) was dissolved in a 7:2:1 mixture of CH<sub>3</sub>OH:H<sub>2</sub>O:Et<sub>3</sub>N (4.5 mL). The reaction mixture was stirred at room temperature for 2h and was monitored by TLC. The solution was concentrated under a reduced pressure, followed by toluene azeotrop (10mL x 3) and the resulting residue purified through column chromatography (CHCl<sub>3</sub>/MeOH = 9/1) to afford desired compound **36** as colorless oil (31 mg, 85%).

We also prepare compound **36** using an alternative method.

To a solution of compound **8** (27 mg, 0.053mmol) in MeOH/H<sub>2</sub>O = 9/1 (1mL) was added K<sub>2</sub>CO<sub>3</sub> (16 mg, 0.112mmol) and the mixture was stirred for 2h at room temperature. The reaction was monitored by TLC and upon completion neutralized with Amberlite IR-120 (H<sup>+</sup>), followed by filtration. The filtrate was concentrated and purified by column chromatography (CHCl<sub>3</sub>/MeOH = 9/1) to afford desired compound **36** as colorless oil (15 mg, 74%).

Colorless oil, <sup>1</sup>H NMR (400 MHz, CD<sub>3</sub>OD); δ 7.37-7.29 (m, 8H, ArH, ArH\*), 7.25-7.15 (m, 2H, ArH, ArH\*) 4.64 (t, *J* = 3.6 Hz, 2H, H-1, H-1\*), 4.26-4.18 (m, 2H, H6a, H6a\*), 4.16-4.07 (m 6H, H6b, H6b\*, NHBn, NHBn\*), 3.68-3.65 (m, 2H, H-5, H-5\*), 3.67 (d, *J* = 11.1 Hz, 3H, CH<sub>3</sub>), 3.66 (d, *J* = 11.1 Hz, 3H, CH\*), 3.61 (td, *J* = 10.2, 1.2 Hz, 2H, H-3, H-3\*), 3.39-3.34 (m, 2H, H-2, H-2\*), 3.38 (s, 3H, CH<sub>3</sub>), 3.36 (s, 3H, CH<sub>3</sub>\*), 3.30-3.25 (m, 2H, H-4, H-4\*); <sup>13</sup>C NMR (100MHz, CD<sub>3</sub>OD) δ 141.60 (C, C\*), 129.4 (CH, CH\*), 128.50 (CH, CH\*), 128.15 (CH, CH\*), 101.3 (CH, CH\*), 75.00 (CH, CH\*), 73.46 (CH, CH\*), 71.99 (d, *J* = 7.5 Hz, CH, CH\*), 71.41 (CH), 71.23 (CH\*), 67.02 (d, *J* = 5.2 Hz, CH<sub>2</sub>), 66.80 (d, *J* = 4.9 Hz, CH<sub>2</sub>\*), 55.66 (CH<sub>3</sub>, CH<sub>3</sub>\*), 53.78 (CH<sub>3</sub>, CH<sub>3</sub>\*), 45.91(CH<sub>2</sub>, CH<sub>2</sub>\*); <sup>31</sup>P NMR (161.97 MHz, CD<sub>3</sub>OD): δ 12.1; (HR-ESI) calcd for C<sub>15</sub>H<sub>24</sub>NO<sub>8</sub>NaP [M+Na]<sup>+</sup> 400.1137, Found 400.1136.

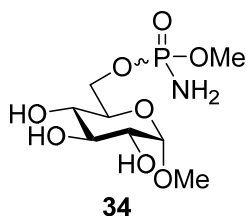

#### **Methyl 6-*O*-(methyl phosphoramidyl)-α-D-glucopyranoside (34).**

To a solution of compound **36** (11 mg, 0.029 mmol) in EtOH (0.3 mL) was added Pd(OH)<sub>2</sub> (60 mg) and the mixture was stirred overnight at room temperature under H<sub>2</sub> atmosphere.<sup>3</sup> Reaction



was monitored by TLC. The reaction was diluted with EtOH (2 mL) and was filter through a celite bed. The bed was further washed with EtOH (3 mL), and the EtOH was concentrated under reduced pressure and dried under high vacuum to afford desired compound **34** as a colorless oil in quantitative yield (10 mg). Data is in agreement with the known literature.<sup>1</sup>

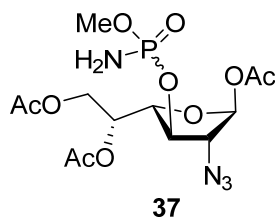

**1,5,6-tri-*O*-acetyl-2-azido-2-deoxy-3-*O*-(methyl phosphoramidyl)-β-*D*-galactofuranose (**37**).**

To a solution of compound **31** (50 mg, 0.097 mmol) in ethyl acetate (2 mL) a solution of NaBrO<sub>3</sub> (44 mg, 0.296mmol, 3 equiv) in H<sub>2</sub>O (1 mL) was added by dropper. To the above reaction mixture, a solution of Na<sub>2</sub>S<sub>2</sub>O<sub>4</sub> (50 mg, 0.296mmol, 3 equiv) in H<sub>2</sub>O (2mL) was added dropwise using dropper. The reaction mixture stirred vigorously for 1h at room temperature. Reaction was monitored by TLC. Upon completion the reaction mixture was then diluted with ethyl acetate and washed with brine. The organic layers were combined and the mixture was dried over MgSO<sub>4</sub>, concentrated and purified through column chromatography to afford desired compound as a colorless oil (33 mg, 81%).

Colorless oil, [ $\alpha$ ]<sup>28</sup><sub>D</sub> -1.2 (*c* 0.15, CHCl<sub>3</sub>); <sup>1</sup>H NMR (400 MHz, CDCl<sub>3</sub>);  $\delta$  6.08 (s, 2H, H-1, H-1\*), 5.34 (tt, *J* = 2H, 6.5, 3.8 Hz, H-3, H-3\*), 4.45 (td, *J* = 6.6, 3.0 Hz, 2H, H-5, H-5\*), 4.38 (dd, *J* = 5.7, 3.3 Hz, 1H, H-4), 4.34 (dd, *J* = 6.1, 3.4 Hz, 1H, H-4\*), 4.30-4.17 (m, 6H, H-2, H-2\*, H6a, H6a\*, H6b, H6b\*), 3.75 (d, *J* = 11.4 Hz, 3H, CH<sub>3</sub>), 3.74 (d, *J* = 11.2 Hz, 3H, CH<sub>3</sub>\*), 3.32 (d, *J* = 5.0 Hz, 4H, NH<sub>2</sub>, NH<sub>2</sub>\*), 2.11 (s, 3H, CH<sub>3</sub>), 2.10 (CH<sub>3</sub>\*), 2.08 (S, 6H, CH<sub>3</sub>, CH<sub>3</sub>\*), 2.02 (s, 6h, CH<sub>3</sub>, CH<sub>3</sub>\*); <sup>13</sup>C NMR (100 MHz, CDCl<sub>3</sub>)  $\delta$  170.65 (C), 170.60 (C, C\*), 170.4 (C), 169.4 (C\*), 169.3 (C), 100.0 (CH), 99.94 (CH\*), 82.70 (d, *J* = 6.8 Hz, CH), 82.37 (d, *J* = 8.5 Hz, CH\*), 78.92 (d, *J* = 5.3 Hz, CH), 78.77 (d, *J* = 4.2 Hz, CH\*), 70.7 (CH), 70.54 (d, *J* = 2.8 Hz, CH\*), 68.80 (CH), 68.71 (CH\*), 62.60 (CH<sub>2</sub>, CH<sub>2</sub>\*), 53.53 (t, *J* = 7.6 Hz, CH<sub>3</sub>, CH<sub>3</sub>\*), 20.93 (CH<sub>3</sub>, CH<sub>3</sub>\*), 20.75 (CH<sub>3</sub>, CH<sub>3</sub>\*), 20.64 (CH<sub>3</sub>, CH<sub>3</sub>\*); <sup>31</sup>P NMR (161.97 MHz, CDCl<sub>3</sub>):  $\delta$  10.9, 10.6; (HR-ESI) calcd for C<sub>13</sub>H<sub>21</sub>N<sub>4</sub>O<sub>10</sub>NaP [M+Na]<sup>+</sup> 447.0893, Found 447.0901.

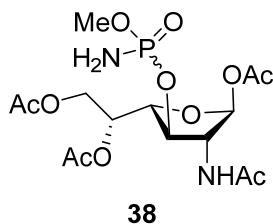

**1,5,6-tri-*O*-acetyl-2-acetamido-2-deoxy-3-*O*-(methyl phosphoramidyl)-β-D-galactofuranose (38).**

To a solution of compound **37** (30g, 0.070 mmol) in EtOH (1 mL) was added Pd (OH)<sub>2</sub> (150 mg) and stirred reaction mixture for 5 h at room temperature under H<sub>2</sub> atmosphere.<sup>3</sup> Reaction was monitored by TLC. After completion filter the reaction mixture through a celite bed. The bed was further washed with EtOH (3 mL). The EtOH was concentrated under a reduced pressure and the residue was dried under high vacuum, which was dissolved in pyridine (1 mL) and added Ac<sub>2</sub>O (8.02 μL, 0.0848 mmol, 1.0 equiv). The mixture was stirred for additional 3 h at room temperature. The reaction was monitored by TLC, and upon completion was purified through column chromatography (CHCl<sub>3</sub>/MeOH = 4/1) to afford desired compound **38** over two steps (22 mg, 71%).

Alternatively, to a solution of compound **31** (30 mg, 0.058 mmol) in EtOH (1 mL) was added Pd (OH)<sub>2</sub> (150 mg) and stirred reaction mixture overnight at room temperature under H<sub>2</sub> atmosphere.<sup>3</sup> The reaction was monitored by TLC. Upon completion, the mixture was filtered through a celite bed. The bed was further washed with EtOH (3 mL) and the EtOH was concentrated under a reduced pressure and the residue was dried under high vacuum. The residue was dissolved in pyridine (1 mL), added Ac<sub>2</sub>O (1.0 equiv) and stirred for additional 3 h at room temperature. The reaction was monitored by TLC, and upon completion, co-evaporated with toluene (10 mL x 3), and the residue was purified through column chromatography (CHCl<sub>3</sub>/MeOH = 4/1) to afford the desired compound **38** over two steps (17 mg, 68%).

Colorless oil, [ $\alpha$ ]<sub>D</sub><sup>28</sup> 1.2 (*c* 1.0, CHCl<sub>3</sub>); <sup>1</sup>H NMR (400 MHz, CDCl<sub>3</sub>);  $\delta$  7.08 (d, *J* = 4.5 Hz, 1H, NH), 7.06 (d, *J* = 4.4 Hz, 1H, NH\*), 6.12 (d, *J* = 0.9 Hz, 1H, H-1), 6.08 (s, 1H, H-1\*), 5.28-5.24 (m, 2H, H-3, H-3\*), 4.60-4.50 (m, 2H, H-5, H-5\*), 4.42-4.28 (m, 6H, H4, H-4\*, H-2, H-2\*, H6a, H6b), 4.17 (dd, *J* = 12.0, 7 Hz, 2H, H6a\*, H6b\*), 3.71 (d, *J* = 11.3 Hz, 3H, CH<sub>3</sub>), 3.70 (d, *J* = 11.5 Hz, 3H, CH<sub>3</sub>\*), 3.53 (d, *J* = 5.3 Hz, 2H, NH<sub>2</sub>), 3.50 (d, *J* = 5.8 Hz, 2H, NH<sub>2</sub>\*), 2.11 (s, 3H, CH<sub>3</sub>), 2.10 (s, 3H, CH<sub>3</sub>\*), 2.08 (s, 3H, CH<sub>3</sub>), 2.07 (s, 3H, CH<sub>3</sub>\*), 2.02 (s, 6H, CH<sub>3</sub>, CH<sub>3</sub>\*), 1.98 (s, 6H,

CH<sub>3</sub>, CH<sub>3</sub>\*); <sup>13</sup>C NMR (100 MHz, CDCl<sub>3</sub>) δ 170.9 (C), 170.8 (C\*), 170.7 (C), 170.6 (C, C\*), 170.4 (C), 169.6 (C\*), 169.5 (C), 99.54 (CH), 99.28 (CH\*), 82.19 (d, *J* = 7.5 Hz, CH), 81.72 (d, *J* = 8.1 Hz, CH\*), 79.45 (d, *J* = 4.1 Hz, CH), 78.63 (d, *J* = 5.3 Hz, CH\*), 69.53 (CH), 69.20 (CH\*), 62.61 (CH<sub>2</sub>), 62.50 (CH<sub>2</sub>\*), 61.34 (CH), 60.97 (CH\*), 53.55 (d, *J* = 5.5 Hz, CH<sub>3</sub>), 53.44 (d, *J* = 5.6 Hz, CH<sub>3</sub>\*), 22.88 (CH<sub>3</sub>), 22.83 (CH<sub>3</sub>\*), 21.03 (CH<sub>3</sub>, CH<sub>3</sub>\*), 20.81 (CH<sub>3</sub>, CH<sub>3</sub>\*), 20.64 (CH<sub>3</sub>, CH<sub>3</sub>\*); <sup>31</sup>P NMR (161.97 MHz, CDCl<sub>3</sub>): δ 11.3, 10.6; (HR-ESI) calcd for C<sub>15</sub>H<sub>25</sub>N<sub>2</sub>O<sub>11</sub>NaP [M+Na]<sup>+</sup> 463.1094, Found 463.1089.

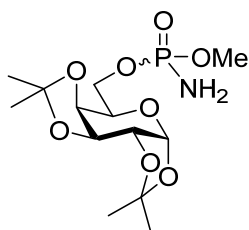

**1,2:3,4-di-O-isopropylidene-6-O-(methyl phosphoramidyl)-D-galactopyranose.**

To a solution of compound **11** (133 mg, 0.300 mmol) in ethyl acetate (4 mL) a solution of NaBrO<sub>3</sub> (136 mg, 0.900 mmol, 3 equiv) in H<sub>2</sub>O (3 mL) was added by dropper. To the above reaction mixture, a solution of Na<sub>2</sub>S<sub>2</sub>O<sub>4</sub> (157 mg, 0.900 mmol, 3 equiv) in H<sub>2</sub>O (6mL) was added dropwise using dropper. The reaction mixture stirred vigorously for 1h at room temperature. Reaction was monitored by TLC. Upon completion the reaction mixture was then diluted with ethyl acetate and washed with brine. The organic layer was dried over MgSO<sub>4</sub>, concentrated and purified through column chromatography to afford desired compound as a colorless oil (29 mg, 83%).

Colorless oil, IR (CHCl<sub>3</sub>) ν 3397, 2987, 1383, 1253, 1212, 1168, 1068, 1002, 903, 857, 776 cm<sup>-1</sup>; <sup>1</sup>H NMR (400 MHz, CDCl<sub>3</sub>); δ 5.51 (s, 1H, H-1), 5.50 (s, 1H, H-1\*), 4.60 (t, *J* = 2.2 Hz, 1H, H-3), 4.57 (t, *J* = 2.2 Hz, 1H, H-3\*), 4.30 (ddd, *J* = 5.0, 2.5, 1.1 Hz, 2H, H-2, H-2\*), 4.23 (t, *J* = 1.8 Hz, 1H, H-4), 4.20 (t, *J* = 1.7 Hz, 1H, H-4\*), 4.19-4.01 (m, 6H, H-5, H-5\*, H6a, H6b, H6a\*, H6b\*), 3.71 (d, *J* = 11.3 Hz, 3H, POCH<sub>3</sub>), 3.70 (d, *J* = 11.4 Hz, 3H, POCH<sub>3</sub>\*), 3.0 (d, *J* = 11.0 Hz, 4H, NH<sub>2</sub>, NH<sub>2</sub>\*), 1.51 (s, 3H, CH<sub>3</sub>), 1.50 (s, 3H, CH<sub>3</sub>\*), 1.40 (s, 3H, CH<sub>3</sub>), 1.40 (s, 3H, CH<sub>3</sub>\*), 1.30 (s, 12H, CH<sub>3</sub>, CH<sub>3</sub>\*, CH<sub>3</sub>, CH<sub>3</sub>\*); <sup>13</sup>C NMR (100 MHz, CDCl<sub>3</sub>) δ 109.66 (C), 109.61 (C\*), 108.8 (C, C\*), 96.29 (CH), 96.26 (CH\*), 70.81 (CH), 70.67 (CH\*), 70.45 (CH), 70.42 (CH\*), 67.50 (CH), 67.43 (CH\*), 66.93 (CH), 66.87 (CH\*), 65.61 (d, *J* = 5.5 Hz, CH<sub>2</sub>), 65.38 (d, *J* = 5.3 Hz, CH<sub>2</sub>\*), 53.32 (CH), 53.26 (CH\*), 25.91 (CH<sub>3</sub> x 2, CH<sub>3</sub>\* x 2), 24.90 (CH<sub>3</sub>), 24.88 (CH<sub>3</sub>\*), 24.45 (CH<sub>3</sub>),

24.40 (CH<sub>3</sub>\*) <sup>31</sup>P NMR (161.97 MHz, CDCl<sub>3</sub>): δ 11.5, 11.1; (HR-ESI) calcd for C<sub>13</sub>H<sub>24</sub>NO<sub>8</sub>NaP [M+Na]<sup>+</sup> 376.1137, Found 376.1129. Data in agreement with known literature.<sup>1</sup>

**References:**

1. R. Ashmus and T. L. Lowary, *Org. Lett.*, 2014, **16**, 2518.
2. M. Matweijuk and J. Thiem, *Eur. J. Org. Chem.*, 2012, 2180.
3. A. A. Joseph, V. M. Dhurandhare, C.-W. Chang, V.P. Verma, G. P. Mishra, C.-C. Ku, C.-C. Lin and C.-C. Wang, *Chem. Commun.*, 2015, **51**, 104.

7.3237  
7.3183  
7.3106  
7.2977  
7.2881  
7.2810  
7.2751  
7.2722  
7.2637  
7.2595  
7.2390

4.1725  
4.1435  
3.8346  
3.8001

Current Data Parameters

NAME vd-742 Reagent  
EXPNO 1  
PROCNO 1

F2 - Acquisition Parameters

Date\_ 20141105  
Time 14.07  
INSTRUM spect  
PROBHD 5 mm Dual 13C/  
PULPROG zg30  
TD 16384  
SOLVENT CDCl3  
NS 64  
DS 2  
SWH 4789.272 Hz  
FIDRES 0.292314 Hz  
AQ 1.7105396 sec  
RG 161.3  
DW 104.400 usec  
DE 6.50 usec  
TE 299.1 K  
D1 1.00000000 sec  
TD0 1

==== CHANNEL f1 =====

NUC1 1H  
P1 10.30 usec  
PL1 -2.00 dB  
PL1W 23.88643074 W  
SFO1 400.1320424 MHz

F2 - Processing parameters

SI 16384  
SF 400.1300175 MHz  
WDW EM  
SSB 0  
LB 0.30 Hz  
GB 0  
PC 1.00

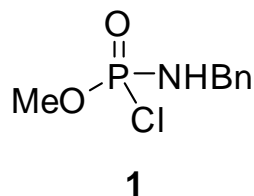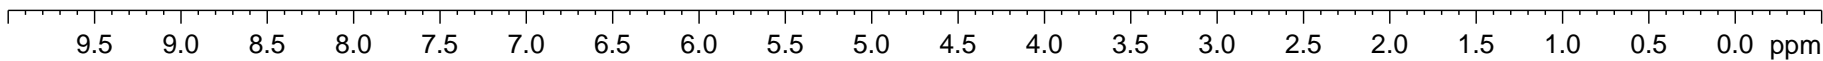

5.39

2.04

3.00



NAME vd-729 Reagent  
EXPNO 2  
PROCNO 1  
Date\_ 20140910  
Time 19.00  
INSTRUM spect  
PROBHD 5 mm PABBO BB-  
PULPROG zgpg30  
TD 65536  
SOLVENT CDCl3  
NS 16  
DS 0  
SWH 104166.664 Hz  
FIDRES 1.589457 Hz  
AQ 0.3146228 sec  
RG 2050  
DW 4.800 usec  
DE 6.50 usec  
TE 300.0 K  
D1 2.00000000 sec  
D11 0.03000000 sec  
TD0 1

===== CHANNEL f1 =====

NUC1 31P  
P1 13.50 usec  
PL1 2.00 dB  
PL1W 16.00742149 W  
SFO1 161.9755930 MHz

===== CHANNEL f2 =====

CPDPRG2 waltz16  
NUC2 1H  
PCPD2 90.00 usec  
PL2 -2.00 dB  
PL12 13.70 dB  
PL13 16.70 dB  
PL2W 16.12334061 W  
PL12W 0.43396533 W  
PL13W 0.21749784 W  
SFO2 400.1320007 MHz  
SI 32768  
SF 161.9755127 MHz  
WDW EM  
SSB 0  
LB 1.00 Hz  
GB 0  
PC 1.00

16.8673

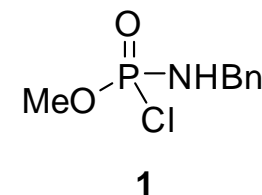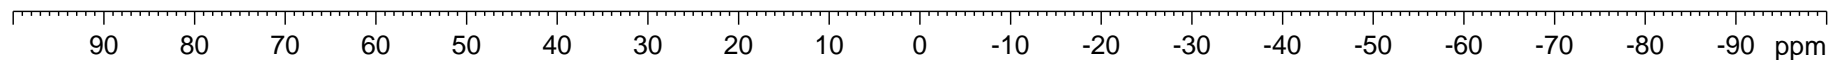

7.4738  
7.4674  
7.4634  
7.4546  
7.4499  
7.3606  
7.3552  
7.3474  
7.3426  
7.3355  
7.3300  
7.3117  
7.3089  
7.2946  
7.2769  
7.2668  
7.2637  
7.2546  
7.2405  
7.2370  
7.2297  
7.2253  
7.2205  
7.2135  
7.1995  
7.1904  
7.1831  
7.1177  
7.1134  
7.0975  
5.5693  
5.5532  
5.0475  
5.0382  
4.9542  
4.9263  
4.6515  
4.6236  
4.3164  
4.3042  
4.2908  
4.2795  
4.0573  
4.0341  
3.9713  
3.9536  
3.9474  
3.9294  
3.7807  
3.7551  
3.6734  
3.6547  
3.6497  
3.6449  
3.6309  
3.6026  
3.4557  
3.3751

Current Data Parameters

NAME vd-711 AV400  
EXPNO 1  
PROCNO 1

F2 - Acquisition Parameters

Date\_ 20140809  
Time 17.14  
INSTRUM spect  
PROBHD 5 mm Dual 13C/  
PULPROG zg30  
TD 16384  
SOLVENT CDCl3  
NS 64  
DS 2  
SWH 4789.272 Hz  
FIDRES 0.292314 Hz  
AQ 1.7105396 sec  
RG 161.3  
DW 104.400 usec  
DE 6.50 usec  
TE 299.7 K  
D1 1.00000000 sec  
TD0 1

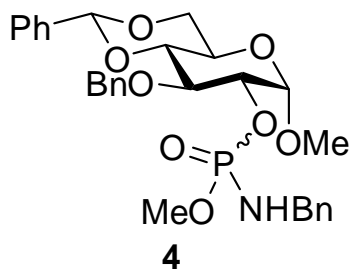

==== CHANNEL f1 =====

NUC1 1H  
P1 10.30 usec  
PL1 -2.00 dB  
PL1W 23.88643074 W  
SFO1 400.1320424 MHz

F2 - Processing parameters

SI 16384  
SF 400.1300170 MHz  
WDW no  
SSB 0  
LB 0 Hz  
GB 0  
PC 1.00



4.05  
7.83  
16.86  
3.00  
2.00  
2.11  
2.15  
2.15  
4.25  
3.34  
3.00  
2.37  
2.25  
8.43  
6.38  
2.07



Current Data Parameters  
NAME vd-711 AV400  
EXPNO 8  
PROCNO 1

F2 - Acquisition Parameters

Date\_ 20140810  
Time 21.29  
INSTRUM spect  
PROBHD 5 mm Dual 13C/  
PULPROG zg0dc  
TD 32768  
SOLVENT CDCl3  
NS 20000  
DS 2  
SWH 23980.814 Hz  
FIDRES 0.731836 Hz  
AQ 0.6832628 sec  
RG 18390.4  
DW 20.850 usec  
DE 6.50 usec  
TE 300.0 K  
D1 3.00000000 sec  
D11 0.03000000 sec  
TDO 1

==== CHANNEL f1 =====  
NUC1 13C  
P0 13.00 usec  
PL1 -3.00 dB  
PL1W 75.17808533 W  
SFO1 100.6228293 MHz

==== CHANNEL f2 =====  
CPDPRG2 waltz16  
NUC2 1H  
PCPD2 90.00 usec  
PL2 -2.00 dB  
PL12 15.90 dB  
PL2W 23.88643074 W  
PL12W 0.38739258 W  
SFO2 400.1318764 MHz

F2 - Processing parameters  
SI 32768  
SF 100.6127714 MHz  
WDW EM  
SSB 0  
LB 3.00 Hz  
GB 0  
PC 1.40

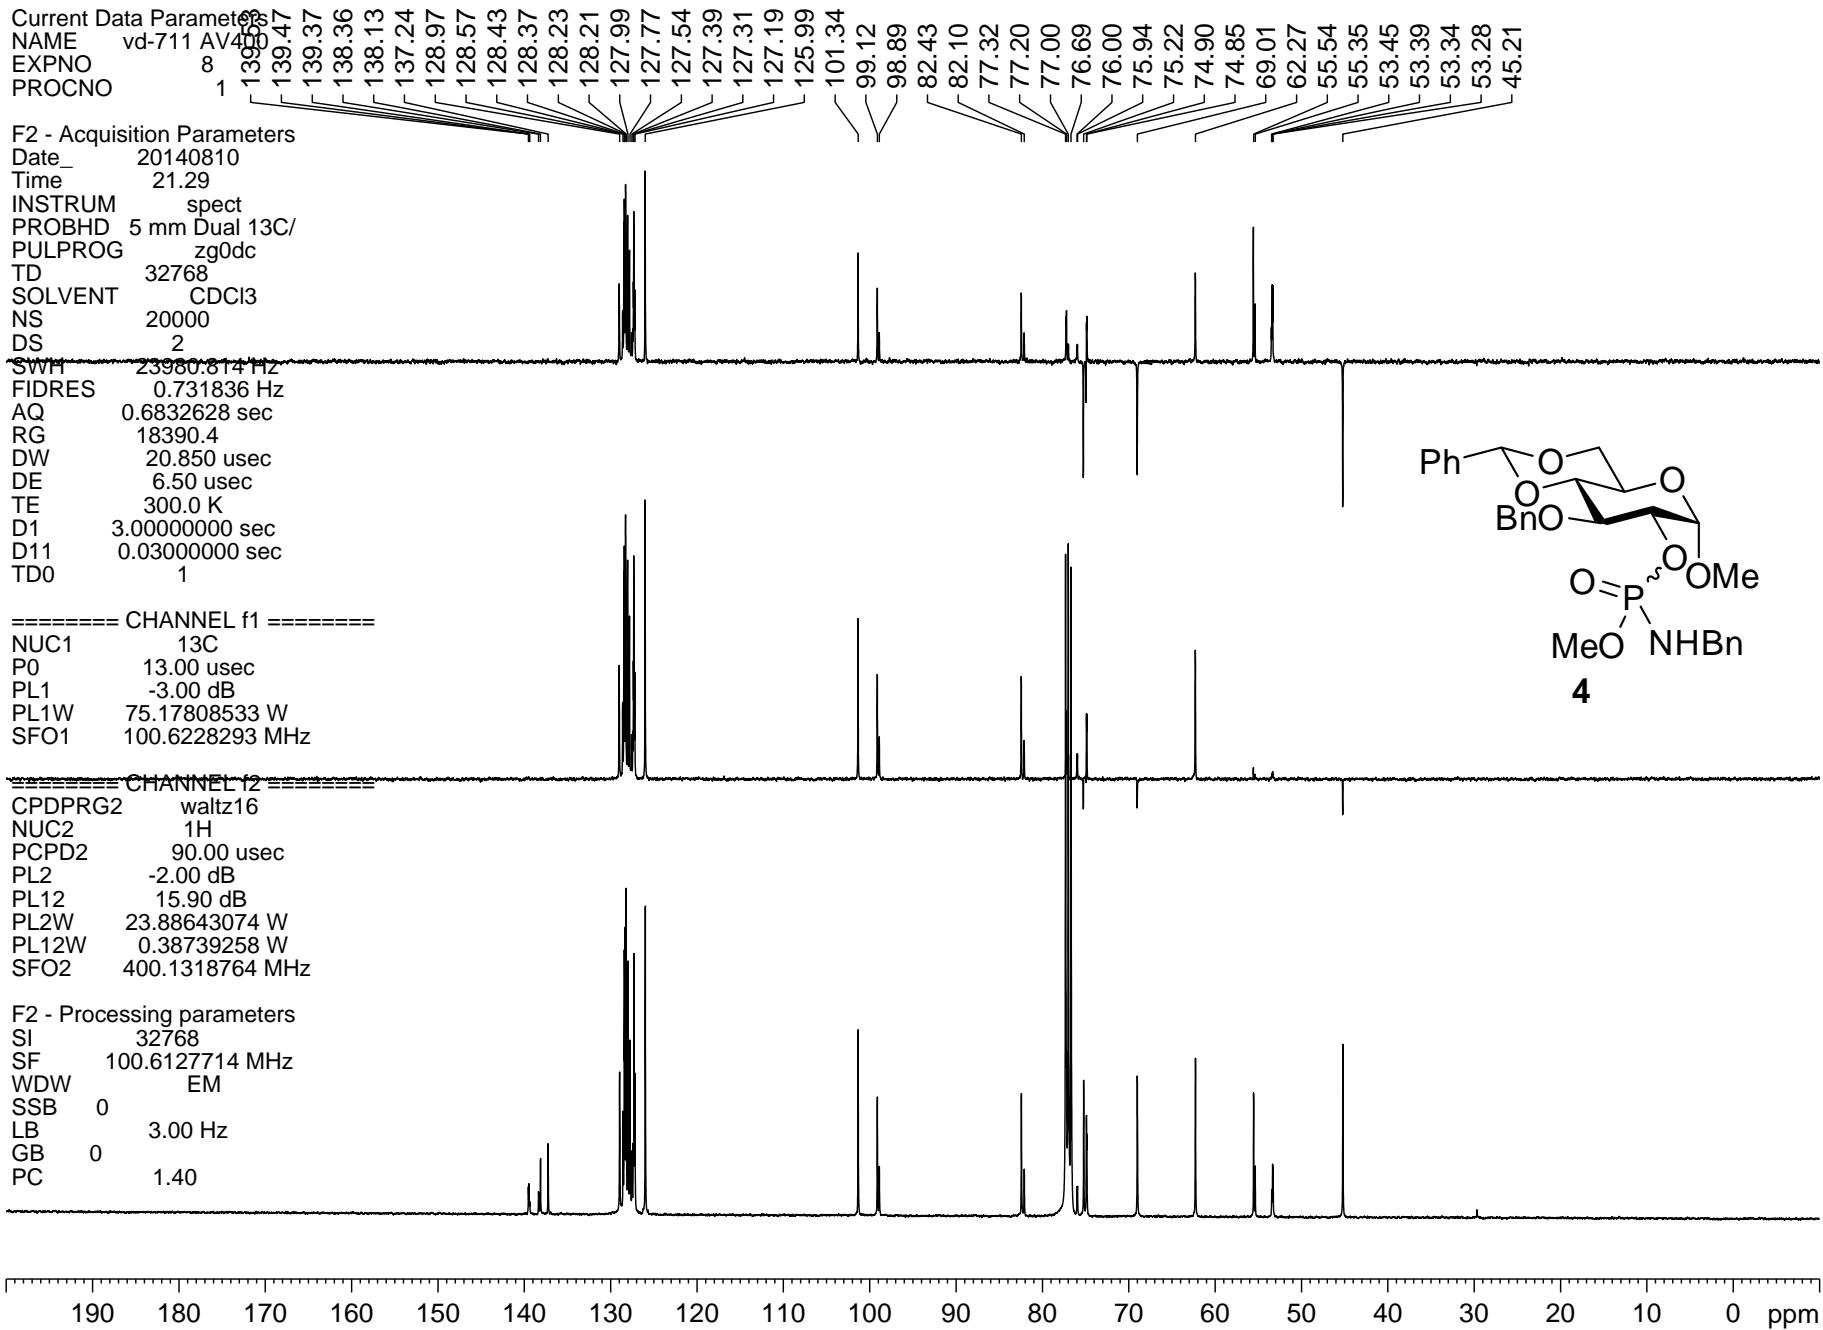

Current Data Parameters

NAME vd-711 P31  
EXPNO 2  
PROCNO 1

F2 - Acquisition Parameters

Date\_ 20140801  
Time 9.56  
INSTRUM spect  
PROBHD 5 mm PABBO BB-  
PULPROG zgpg30  
TD 65536  
SOLVENT CDCl3  
NS 24  
DS 0  
SWH 104166.664 Hz  
FIDRES 1.589457 Hz  
AQ 0.3146228 sec  
RG 2050  
DW 4.800 usec  
DE 6.50 usec  
TE 300.0 K  
D1 2.00000000 sec  
D11 0.03000000 sec  
TD0 1

==== CHANNEL f1 =====

NUC1 31P  
P1 13.50 usec  
PL1 2.00 dB  
PL1W 16.00742149 W  
SFO1 161.9755930 MHz

==== CHANNEL f2 =====

CPDPRG2 waltz16  
NUC2 1H  
PCPD2 90.00 usec  
PL2 -2.00 dB  
PL12 13.70 dB  
PL13 16.70 dB  
PL2W 16.12334061 W  
PL12W 0.43396533 W  
PL13W 0.21749784 W  
SFO2 400.1320007 MHz

F2 - Processing parameters

SI 32768  
SF 161.9755127 MHz  
WDW EM  
SSB 0  
GB 0  
PC 1.00

10.9833  
9.5120

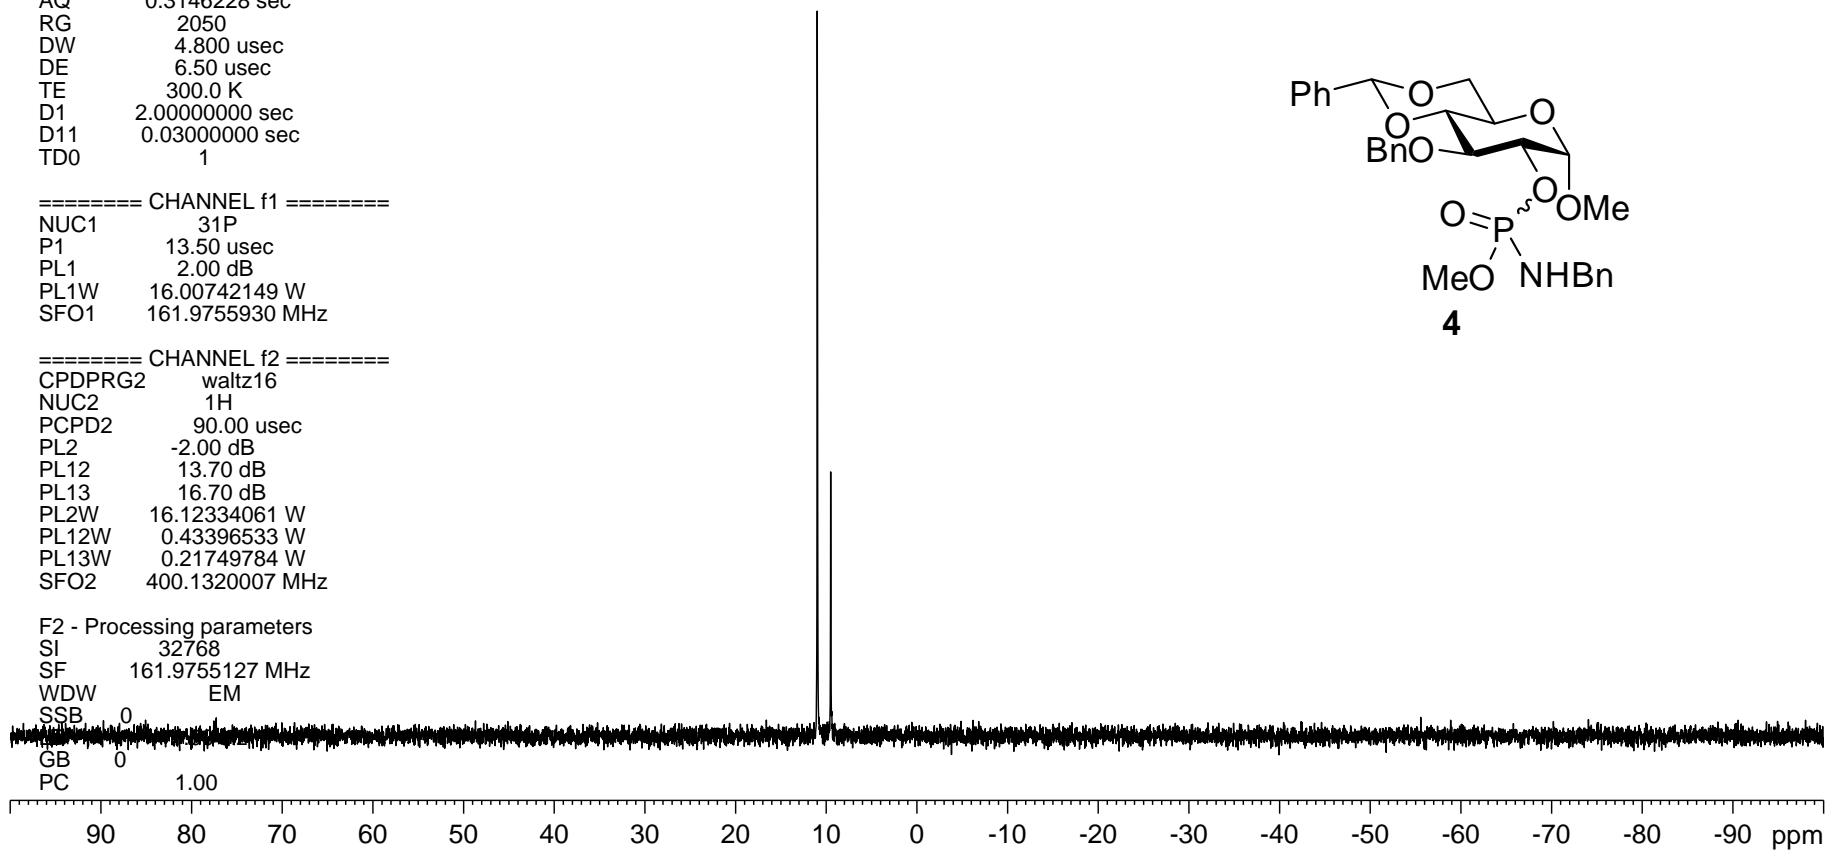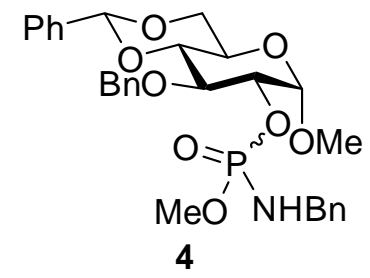

7.3419  
7.3376  
7.3251  
7.3104  
7.3037  
7.2967  
7.2859  
7.2766  
7.2671  
7.2627  
7.2540  
7.2401  
7.2272  
7.2176  
4.9784  
4.9512  
4.8702  
4.8525  
4.8438  
4.8254  
4.8183  
4.8127  
4.7911  
4.7855  
4.7750  
4.7682  
4.7449  
4.7381  
4.6488  
4.6433  
4.6175  
4.6146  
4.6053  
4.5782  
4.5647  
4.5559  
4.5506  
4.5417  
4.2025  
4.1930  
4.1880  
4.0914  
4.0743  
4.0675  
4.0507  
3.9804  
3.9728  
3.6839  
3.6572  
3.6546  
3.5100  
3.4818  
3.4720  
3.4670  
3.4578  
3.4486  
3.3336  
3.3191

Current Data Parameters

NAME vd-692 all  
EXPNO 1  
PROCNO 1

F2 - Acquisition Parameters

Date\_ 20140606  
Time 22.33  
INSTRUM spect  
PROBHD 5 mm PABBO BB-  
PULPROG zg30  
TD 16384  
SOLVENT CDCl3  
NS 64  
DS 0  
SWH 5597.015 Hz  
FIDRES 0.341615 Hz  
AQ 1.4636873 sec  
RG 144  
DW 89.333 usec  
DE 6.50 usec  
TE 300.0 K  
D1 2.00000000 sec  
TD0 1

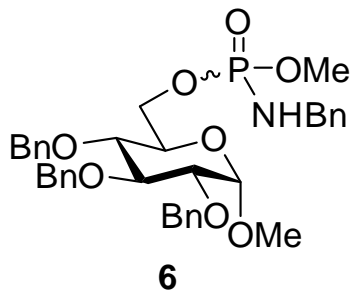

==== CHANNEL f1 =====

NUC1 1H  
P1 13.40 usec  
PL1 -2.00 dB  
PL1W 16.12334061 W  
SFO1 400.1326012 MHz

F2 - Processing parameters

SI 8192  
SF 400.1300175 MHz  
WDW no  
SSB 0  
LB 0 Hz  
GB 0  
PC 1.00



38.70

2.00  
6.06  
6.02  
4.15  
3.97  
2.07  
2.18  
5.66  
1.55  
2.73  
5.78  
1.97

Current Data Parameters

NAME vd-692 all  
 EXPNO 2  
 PROCNO 1

F2 - Acquisition Parameters

Date\_ 20140606  
 Time 22.37  
 INSTRUM spect  
 PROBHD 5 mm PABBO BB-  
 PULPROG zgpg30  
 TD 32768  
 SOLVENT CDCl3  
 NS 6000  
 DS 0  
 SWH 23148.148 Hz  
 FIDRES 0.706425 Hz  
 AQ 0.7078388 sec

RG 2050  
 DW 21.600 usec  
 DE 8.50 usec  
 TE 300.0 K  
 D1 2.00000000 sec  
 D11 0.03000000 sec  
 TD0 1

==== CHANNEL f1 =====

NUC1 13C  
 P1 9.80 usec  
 PL1 -2.00 dB  
 PL1W 55.33689499 W  
 SFO1 100.6238359 MHz

==== CHANNEL f2 =====

CPDPRG2 waltz16  
 NUC2 1H  
 PCPD2 90.00 usec  
 PL2 -2.00 dB  
 PL12 13.70 dB  
 PL13 16.70 dB  
 PL2W 16.12334061 W  
 PL12W 0.43396533 W  
 PL13W 0.21749784 W  
 SFO2 400.1326011 MHz

F2 - Processing parameters

SI 16384  
 SF 100.6127693 MHz  
 WDW EM  
 SSB 0  
 LB 3.00 Hz  
 GB 0  
 PC 1.00

139.48  
 138.70  
 138.10  
 128.60  
 128.45  
 128.39  
 128.05  
 127.93  
 127.79  
 127.77  
 127.61  
 127.42  
 127.27  
 98.10  
 98.03  
 81.90  
 79.90  
 77.45  
 77.32  
 77.00  
 76.69  
 75.75  
 75.70  
 75.11  
 75.02  
 73.35  
 69.64  
 69.56  
 69.47  
 65.39  
 65.34  
 64.89  
 64.85  
 55.23  
 53.20  
 45.36

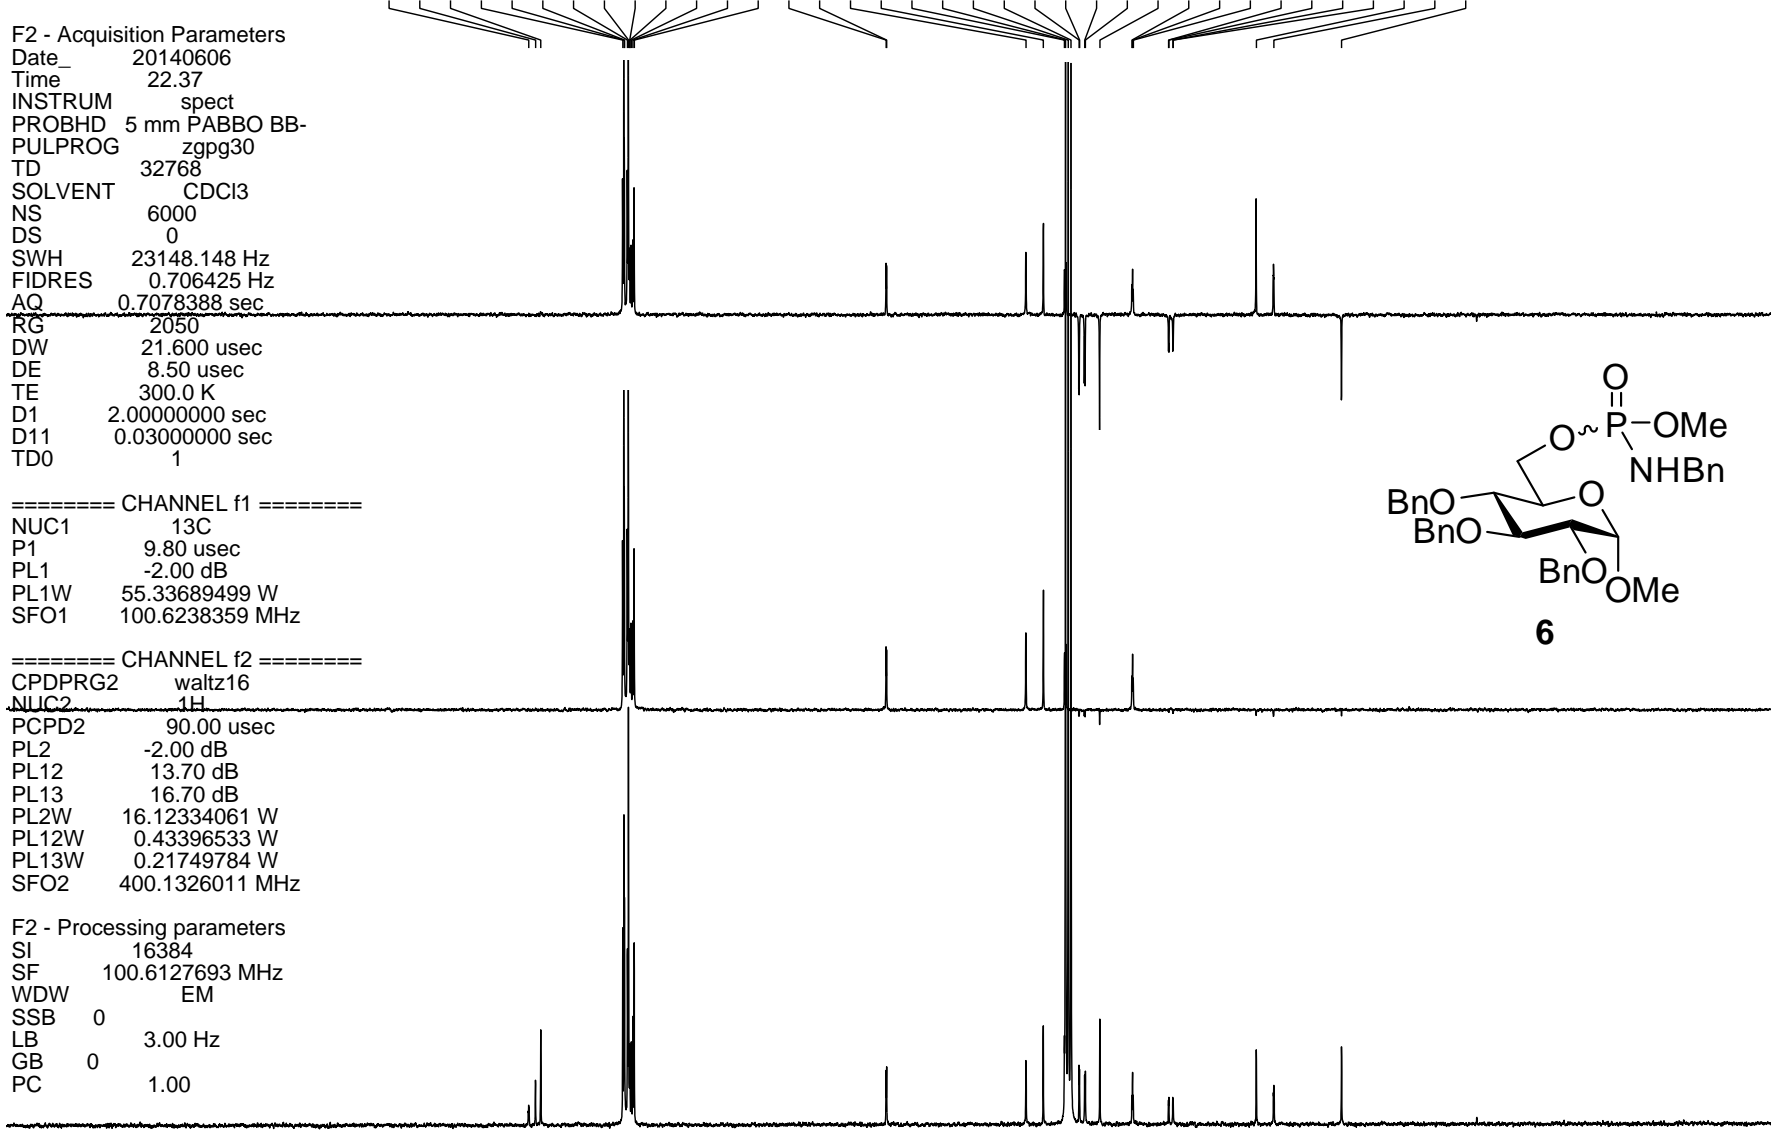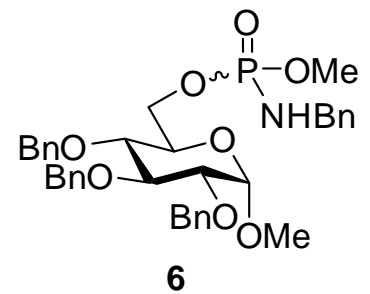

190 180 170 160 150 140 130 120 110 100 90 80 70 60 50 40 30 20 10 0 ppm

Current Data Parameters

NAME vd-692 P31  
EXPNO 1  
PROCNO 1

F2 - Acquisition Parameters

Date\_ 20140607  
Time 11.11  
INSTRUM spect  
PROBHD 5 mm PABBO BB-  
PULPROG zgpg30  
TD 65536  
SOLVENT CDCl3  
NS 36  
DS 0  
SWH 104166.664 Hz  
FIDRES 1.589457 Hz  
AQ 0.3146228 sec  
RG 2050  
DW 4.800 usec  
DE 6.50 usec  
TE 300.0 K  
D1 2.00000000 sec  
D11 0.03000000 sec  
TD0 1

==== CHANNEL f1 =====

NUC1 31P  
P1 13.50 usec  
PL1 2.00 dB  
PL1W 16.00742149 W  
SFO1 161.9755930 MHz

==== CHANNEL f2 =====

CPDPRG2 waltz16  
NUC2 1H  
PCPD2 90.00 usec  
PL2 -2.00 dB  
PL12 14.20 dB  
PL13 17.20 dB  
PL2W 16.12334061 W  
PL12W 0.38677201 W  
PL13W 0.19384515 W  
SFO2 400.1320007 MHz

F2 - Processing parameters

SI 32768  
SF 161.9755127 MHz  
WDW EM  
SSB 0  
GB 0  
PC 1.00

10.5749  
10.4372

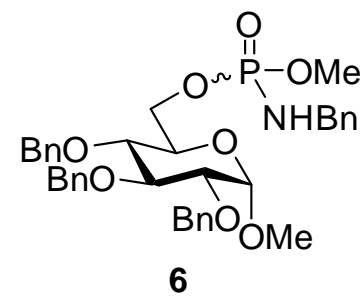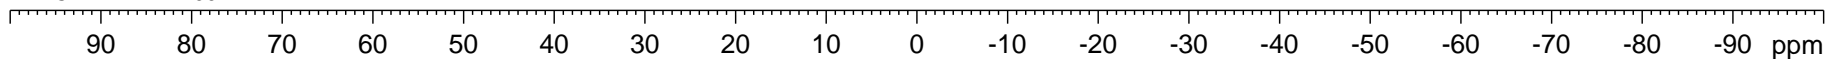

7.2985  
7.2883  
7.2716  
7.2678  
7.2592  
7.2446  
7.2401  
7.2328  
7.2227  
7.2167  
7.2104  
7.2027  
5.4460  
5.4364  
5.4216  
5.4122  
5.3972  
5.3878  
5.0844  
5.0597  
5.0354  
5.0284  
5.0038  
4.9797  
4.8895  
4.8805  
4.8615  
4.8524  
4.8329  
4.8247  
4.8158  
4.8077  
4.7991  
4.7902  
4.0798  
4.0587  
4.0440  
4.0161  
3.9391  
3.9056  
3.8801  
3.6730  
3.6450  
3.5926  
3.5685  
3.3481  
3.3156  
3.2237  
2.9645  
2.0281  
1.9942  
1.9856  
1.9603  
1.9561  
1.9152

Current Data Parameters

NAME gpm-190  
EXPNO 1  
PROCNO 1

F2 - Acquisition Parameters

Date\_ 20140927  
Time 20.08  
INSTRUM spect  
PROBHD 5 mm Dual 13C/  
PULPROG zg30  
TD 16384  
SOLVENT CDCl3  
NS 8  
DS 2  
SWH 4789.272 Hz  
FIDRES 0.292314 Hz  
AQ 1.7105396 sec  
RG 57  
DW 104.400 usec  
DE 6.50 usec  
TE 296.3 K  
D1 1.00000000 sec  
TD0 1

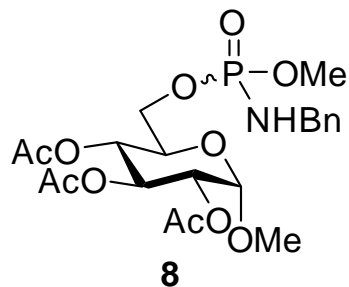

==== CHANNEL f1 =====

NUC1 1H  
P1 10.30 usec  
PL1 -2.00 dB  
PL1W 23.88643074 W  
SFO1 400.1320424 MHz

F2 - Processing parameters

SI 16384  
SF 400.1300170 MHz  
WDW EM  
SSB 0  
LB 0.30 Hz  
GB 0  
PC 1.00

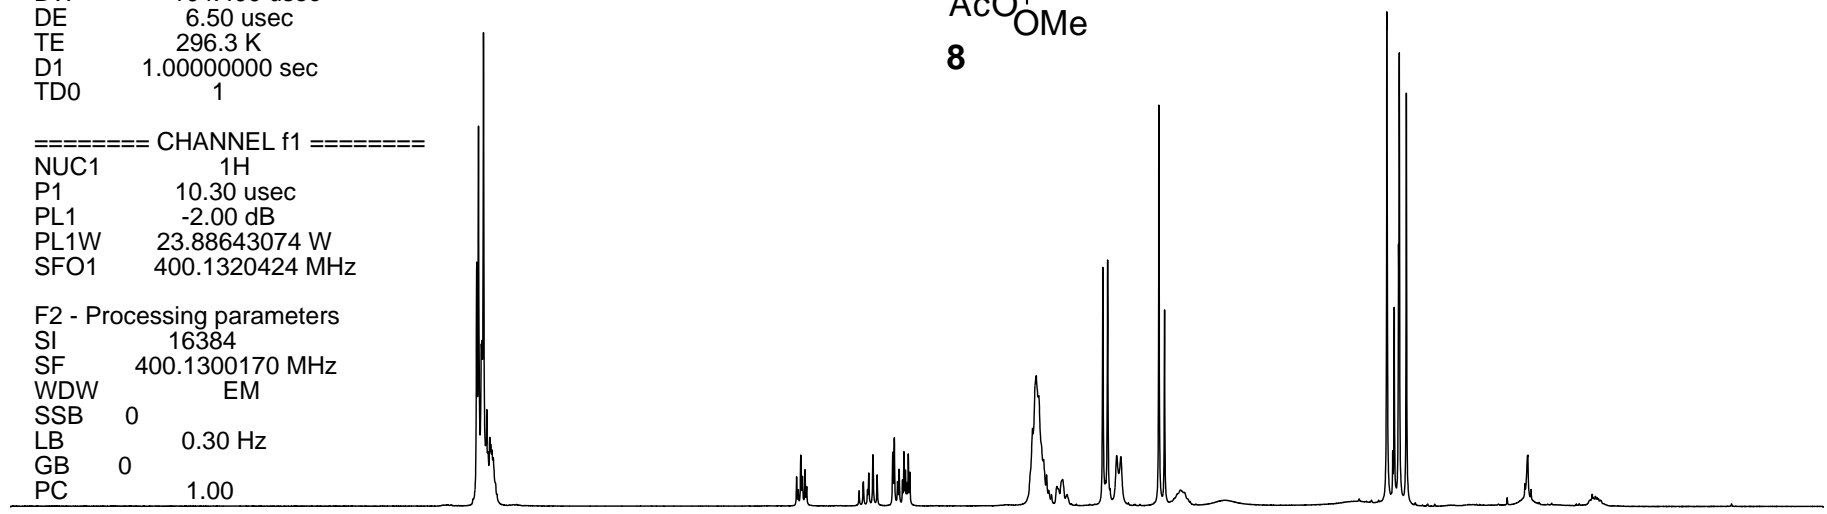

3.56  
6.52  
0.92  
0.31  
0.64  
0.62  
0.31  
0.95  
6.19  
1.03  
3.00  
1.63  
1.83  
0.88  
0.95  
0.71  
2.87  
1.17  
2.70  
1.98

NAME gpm-190  
 EXPNO 19  
 PROCNO 25  
 Date\_ 20140927  
 Time 20:10  
 INSTRUM spect  
 PROBHD 5 mm Dual 13C/  
 PULPROG zg0dc  
 TD 32768  
 SOLVENT CDCl3  
 NS 6000  
 DS 2  
 SWH 23980.814 Hz  
 FIDRES 0.731836 Hz  
 AQ 0.6832628 sec  
 RG 18390.4  
 DW 20.850 usec  
 DE 6.50 usec  
 TE 296.3 K  
 D1 3.00000000 sec  
 D11 0.03000000 sec  
 TD0 1

===== CHANNEL f1 =====  
 NUC1 13C  
 P0 25.00 usec  
 PL1 -3.00 dB  
 PL1W 75.17808533 W  
 SFO1 100.6228293 MHz

===== CHANNEL f2 =====  
 CPDPRG2 waltz16  
 NUC2 1H  
 PCPD2 90.00 usec  
 PL2 -3.00 dB  
 PL12 15.50 dB  
 PL2W 30.07123375 W  
 PL12W 0.42476746 W  
 SFO2 400.1318764 MHz  
 SI 32768  
 SF 100.6127579 MHz  
 WDW EM  
 SSB 0  
 LB 3.00 Hz  
 GB 0  
 PC 1.40

140.06  
 139.68  
 139.62  
 128.70  
 128.67  
 127.50  
 127.45  
 127.38  
 96.82  
 96.77  
 70.86  
 70.33  
 70.26  
 68.51  
 68.34  
 68.00  
 67.91  
 67.79  
 64.33  
 64.29  
 64.10  
 64.06  
 55.55  
 53.50  
 53.44  
 53.39  
 52.16  
 45.33  
 45.25  
 20.80  
 20.76  
 20.68

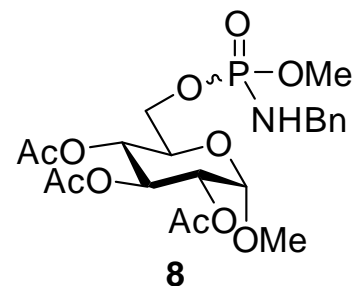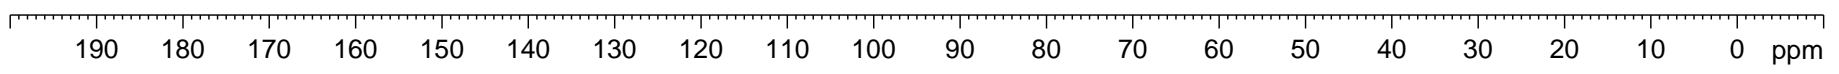

Current Data Parameters  
NAME GPM-190-repeat  
EXPNO 2  
PROCNO 1

F2 - Acquisition Parameters  
Date\_ 20150211  
Time 18.27  
INSTRUM spect  
PROBHD 5 mm PABBO BB-  
PULPROG zgpg30  
TD 65536  
SOLVENT CDCl3  
NS 100  
DS 0  
SWH 104166.664 Hz  
FIDRES 1.589457 Hz  
AQ 0.3146228 sec  
RG 2050  
DW 4.800 usec  
DE 6.50 usec  
TE 300.0 K  
D1 2.00000000 sec  
D11 0.03000000 sec  
TD0 1

===== CHANNEL f1 =====

NUC1 31P  
P1 13.50 usec  
PL1 2.00 dB  
PL1W 16.00742149 W  
SFO1 161.9755930 MHz

===== CHANNEL f2 =====

CPDPRG2 waltz16  
NUC2 1H  
PCPD2 90.00 usec  
PL2 -2.00 dB  
PL12 14.20 dB  
PL13 17.20 dB  
PL2W 16.12334061 W  
PL12W 0.38677201 W  
PL13W 0.19384515 W  
SFO2 400.1320007 MHz

F2 - Processing parameters

SI 32768  
SF 161.9755127 MHz  
WDW EM  
SSB 0  
LB 1.00 Hz  
GB 0  
PC 1.00

16.9844  
10.9094  
10.5832

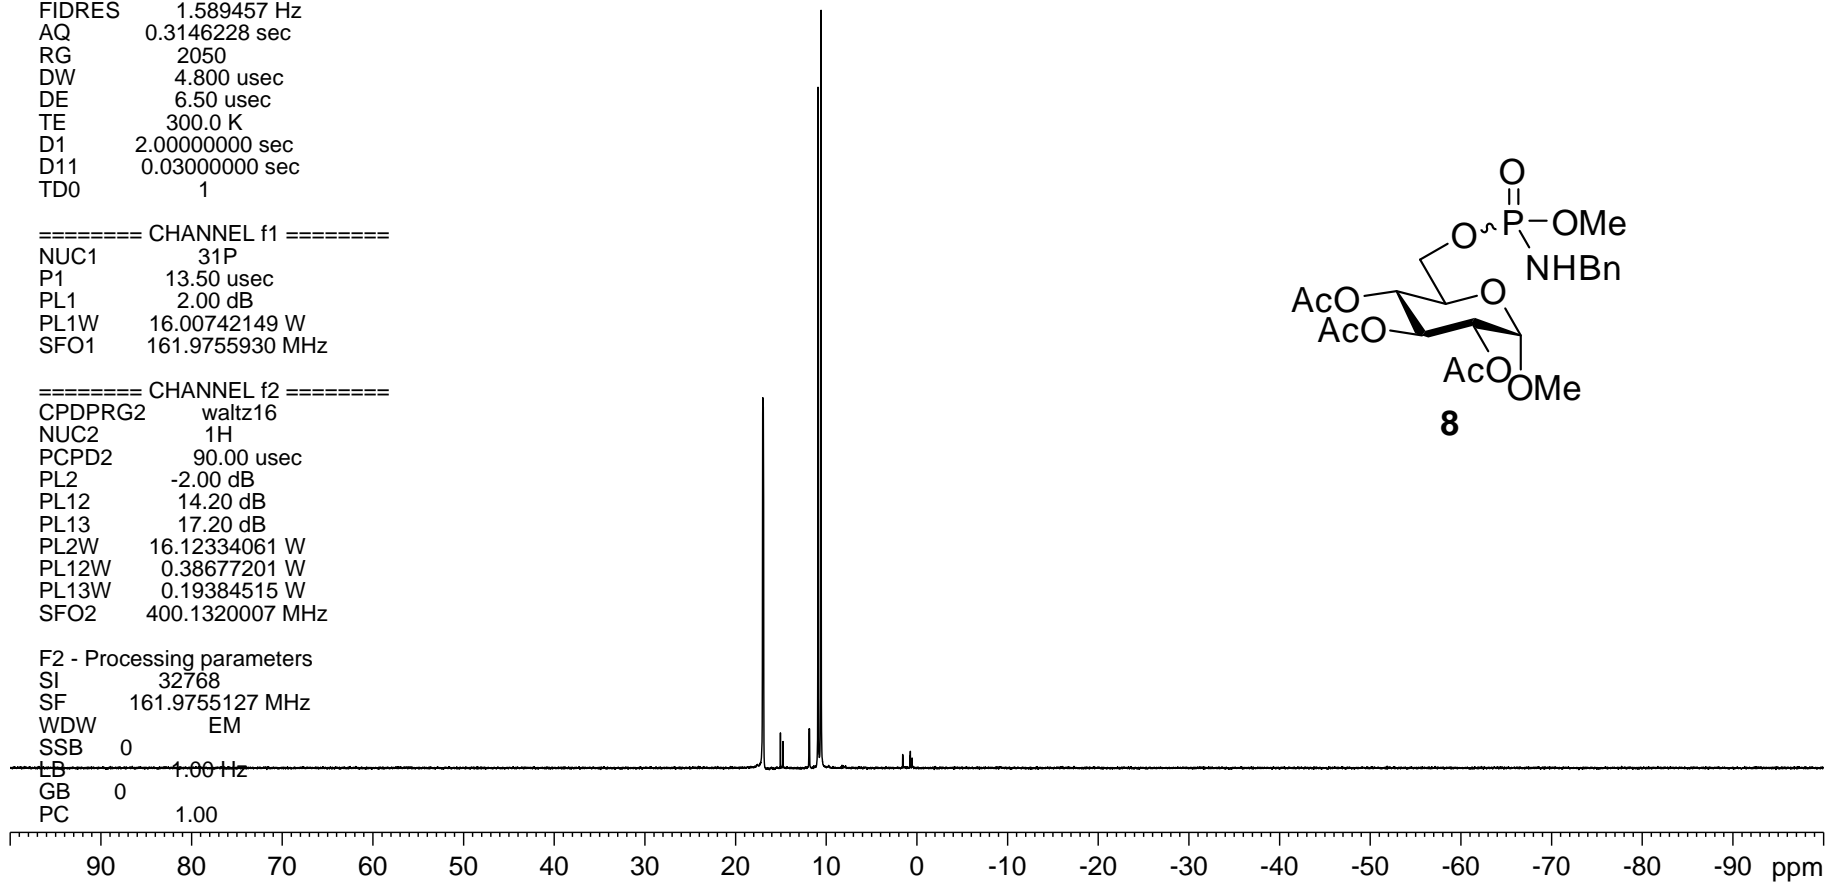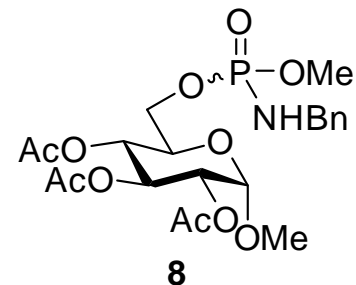



7.2981  
 7.2949  
 7.2879  
 7.2856  
 7.2634  
 7.2391  
 7.2281  
 7.2206  
 7.2165  
 5.4919  
 5.4843  
 5.4797  
 5.4723  
 4.5794  
 4.5748  
 4.5697  
 4.5597  
 4.5551  
 4.5501  
 4.2875  
 4.2813  
 4.2750  
 4.2689  
 4.2058  
 4.2014  
 4.1936  
 4.1889  
 4.1819  
 4.1702  
 4.1434  
 4.1349  
 4.1242  
 4.1210  
 4.1158  
 4.1092  
 4.1050  
 4.0999  
 4.0917  
 4.0843  
 4.0761  
 4.0665  
 4.0592  
 4.0516  
 4.0475  
 4.0324  
 3.6824  
 3.6777  
 3.6754  
 3.6543  
 3.6473  
 1.4930  
 1.4778  
 1.3818  
 1.3639  
 1.2794  
 1.2678  
 1.2601  
 1.2174

Current Data Parameters

NAME vd-690 all  
 EXPNO 1  
 PROCNO 1

F2 - Acquisition Parameters

Date\_ 20140521  
 Time 21.56  
 INSTRUM spect  
 PROBHD 5 mm Dual 13C/  
 PULPROG zg30  
 TD 16384  
 SOLVENT CDCl3  
 NS 64  
 DS 2  
 SWH 4789.272 Hz  
 FIDRES 0.292314 Hz  
 AQ 1.7105396 sec  
 RG 71.8  
 DW 104.400 usec  
 DE 6.50 usec  
 TE 299.9 K  
 D1 1.00000000 sec  
 TD0 1

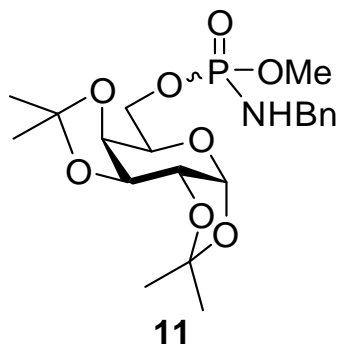

==== CHANNEL f1 =====

NUC1 1H  
 P1 10.30 usec  
 PL1 -2.00 dB  
 PL1W 23.88643074 W  
 SFO1 400.1320424 MHz

F2 - Processing parameters

SI 16384  
 SF 400.1300175 MHz  
 WDW no  
 SSB 0  
 LB 0 Hz  
 GB 0  
 PC 1.00



9.69  
 2.00  
 2.04  
 2.09  
 2.22  
 10.37  
 5.89  
 1.97  
 1.57  
 6.13  
 6.18  
 12.58

Current Data Parameters

NAME vd-690 all  
 EXPNO 8  
 PROCNO 1

F2 - Acquisition Parameters

Date\_ 20140522  
 Time 10.13  
 INSTRUM spect  
 PROBHD 5 mm Dual 13C/  
 PULPROG zg0dc  
 TD 32768  
 SOLVENT CDCl3  
 NS 4609  
 DS 2  
 SWH 23980.814 Hz  
 FIDRES 0.731836 Hz  
 AQ 0.6832628 sec  
 RG 9195.2  
 DW 20.850 usec  
 DE 6.50 usec  
 TE 300.2 K  
 D1 3.00000000 sec  
 D11 0.03000000 sec  
 TDO 1

==== CHANNEL f1 =====

NUC1 13C  
 P0 13.00 usec  
 PL1 -3.00 dB  
 PL1W 75.17808533 W  
 SFO1 100.6228293 MHz

==== CHANNEL f2 =====

CPDPRG2 waltz16  
 NUC2 1H  
 PCPD2 90.00 usec  
 PL2 -2.00 dB  
 PL12 15.90 dB  
 PL2W 23.88643074 W  
 PL12W 0.38739258 W  
 SFO2 400.1318764 MHz

F2 - Processing parameters

SI 32768  
 SF 100.6127750 MHz  
 WDW EM  
 SSB 0  
 LB 3.00 Hz  
 GB 0  
 PC 1.40

139.61  
 139.54  
 128.49  
 127.34  
 127.27  
 127.25  
 109.54  
 109.46  
 108.74  
 96.21  
 77.32  
 77.00  
 76.68  
 70.76  
 70.63  
 70.56  
 70.41  
 70.39  
 67.33  
 67.27  
 66.75  
 66.68  
 65.37  
 65.32  
 64.88  
 64.83  
 53.22  
 53.17  
 53.12  
 45.23  
 29.61  
 25.86  
 24.88  
 24.86  
 24.37

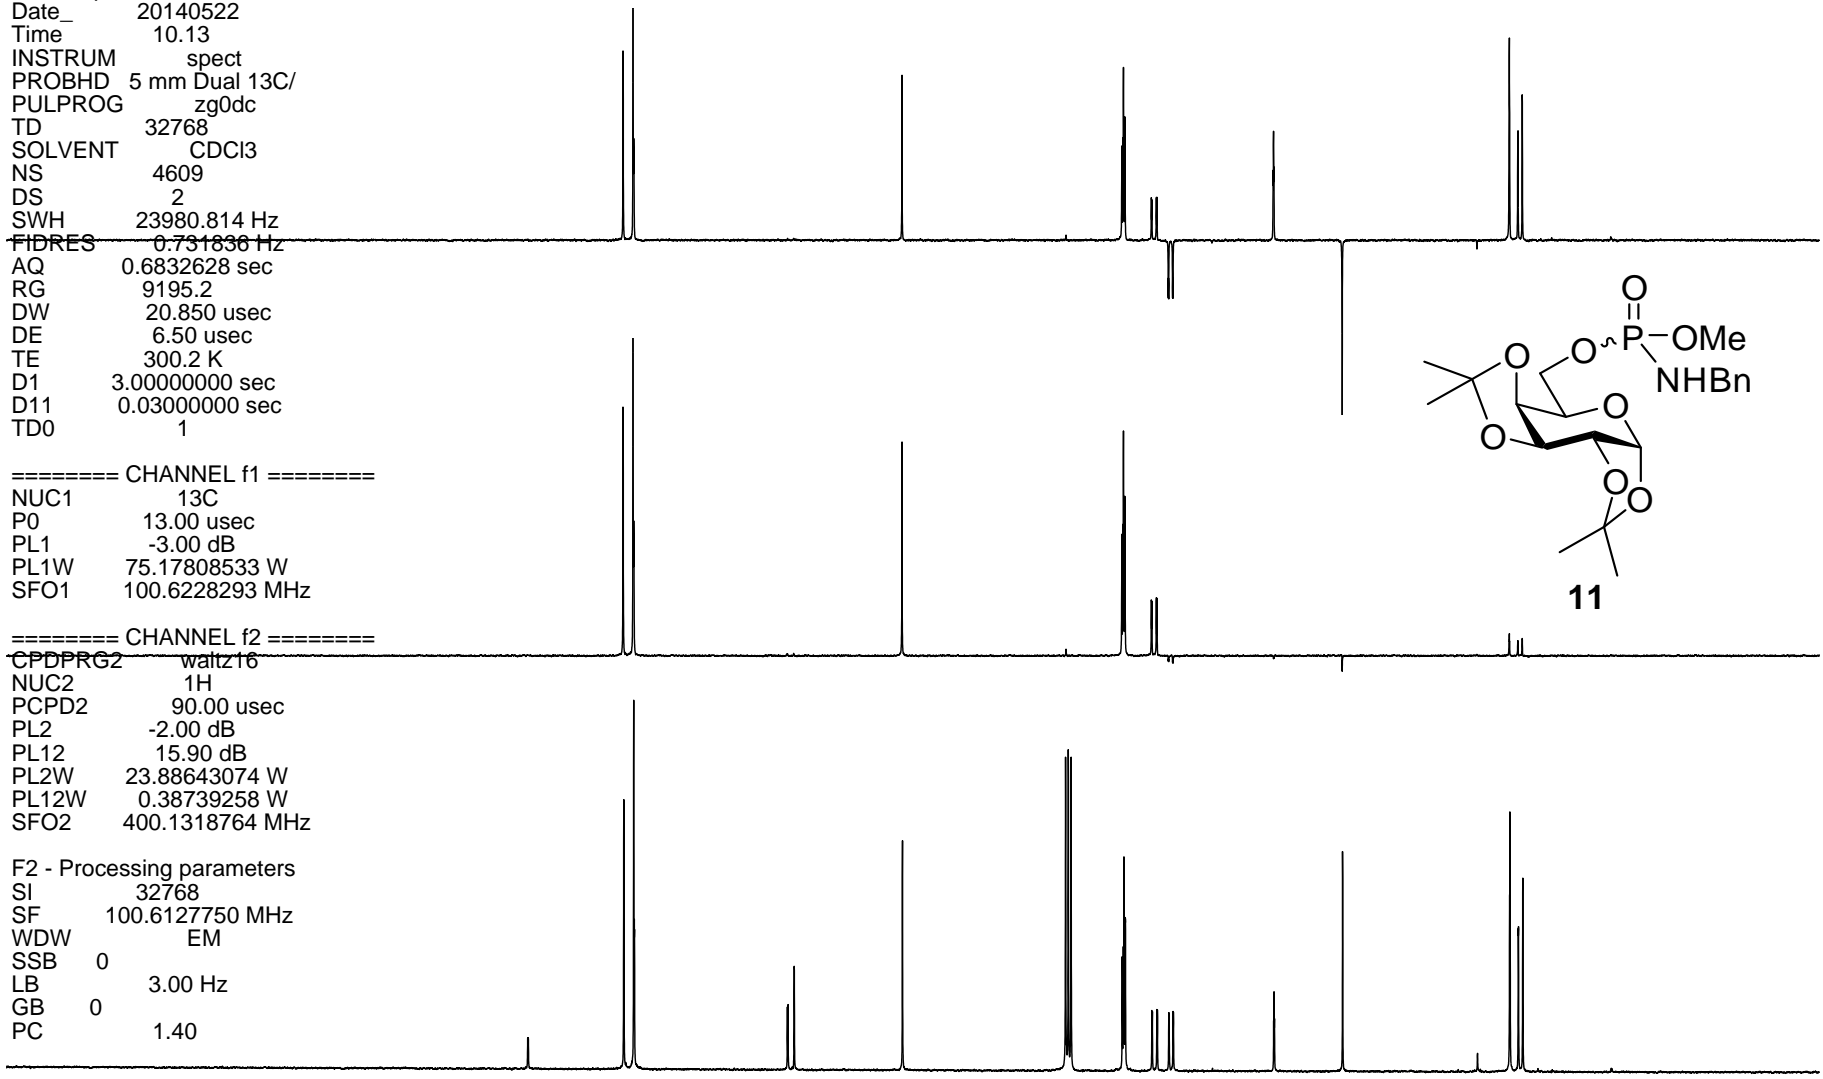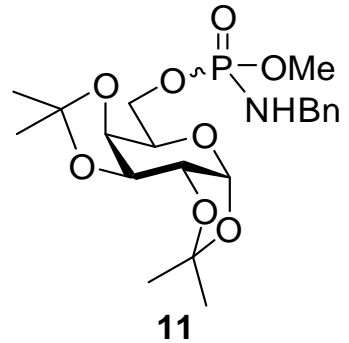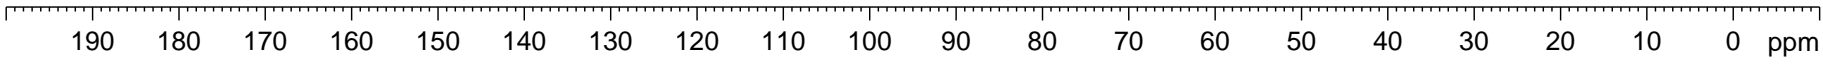

Current Data Parameters

NAME vd-690 P31  
EXPNO 1  
PROCNO 1

F2 - Acquisition Parameters

Date\_ 20140522  
Time 14.41  
INSTRUM spect  
PROBHD 5 mm PABBO BB-  
PULPROG zgpg30  
TD 65536  
SOLVENT CDCl3  
NS 24  
DS 0  
SWH 104166.664 Hz  
FIDRES 1.589457 Hz  
AQ 0.3146228 sec  
RG 2050  
DW 4.800 usec  
DE 6.50 usec  
TE 300.0 K  
D1 2.00000000 sec  
D11 0.03000000 sec  
TD0 1

===== CHANNEL f1 =====

NUC1 31P  
P1 13.50 usec  
PL1 2.00 dB  
PL1W 16.00742149 W  
SFO1 161.9755930 MHz

===== CHANNEL f2 =====

CPDPRG2 waltz16  
NUC2 1H  
PCPD2 90.00 usec  
PL2 -2.00 dB  
PL12 13.70 dB  
PL13 16.70 dB  
PL2W 16.12334061 W  
PL12W 0.43396533 W  
PL13W 0.21749784 W  
SFO2 400.1320007 MHz

F2 - Processing parameters

SI 32768  
SF 161.9755127 MHz  
WDW EM  
SSB 0  
LB 1.00 Hz  
GB 0  
PC 1.00

10.7524  
10.5146

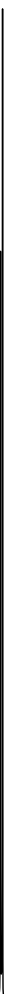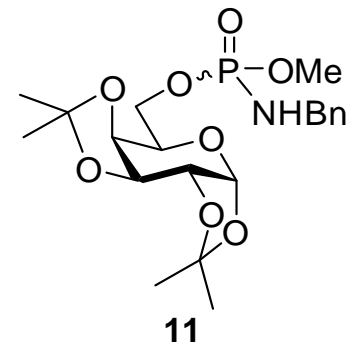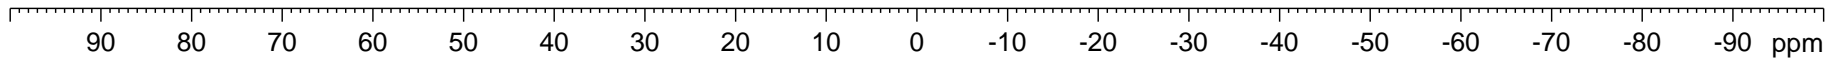

7.4428  
7.4285  
7.4224  
7.4161  
7.3575  
7.3477  
7.3442  
7.3359  
7.3305  
7.3131  
7.3044  
7.2944  
7.2896  
7.2812  
7.2762  
7.2599  
7.2555  
7.2403  
7.2315  
7.2202  
7.2137  
7.2094  
7.2043  
7.1965  
7.1921  
7.1475  
7.1433  
7.1271  
7.1078  
7.0878  
5.5388  
4.9717  
4.9450  
4.7365  
4.7122  
4.6946  
4.6681  
4.3857  
4.3732  
4.3594  
4.3472  
4.2827  
4.2616  
4.2579  
4.2363  
4.0302  
3.8694  
3.8470  
3.8250  
3.7863  
3.7608  
3.7349  
3.7002  
3.6958  
3.6714  
3.6489  
3.4960  
3.4839

Current Data Parameters

NAME vd-717-1 All  
EXPNO 1  
PROCNO 1

F2 - Acquisition Parameters

Date\_ 20140811  
Time 21.48  
INSTRUM spect  
PROBHD 5 mm PABBO BB-  
PULPROG zg30  
TD 16384  
SOLVENT CDCl3  
NS 64  
DS 0  
SWH 5597.015 Hz  
FIDRES 0.341615 Hz  
AQ 1.4636873 sec  
RG 161  
DW 89.333 usec  
DE 6.50 usec  
TE 300.0 K  
D1 2.00000000 sec  
TD0 1

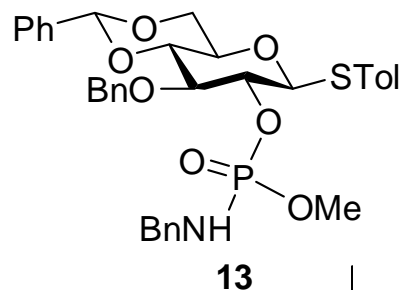

===== CHANNEL f1 =====

NUC1 1H  
P1 13.40 usec  
PL1 -2.00 dB  
PL1W 16.12334061 W  
SFO1 400.1326012 MHz

F2 - Processing parameters

SI 8192  
SF 400.1300175 MHz  
WDW no  
SSB 0  
LB 0 Hz  
GB 0  
PC 1.00

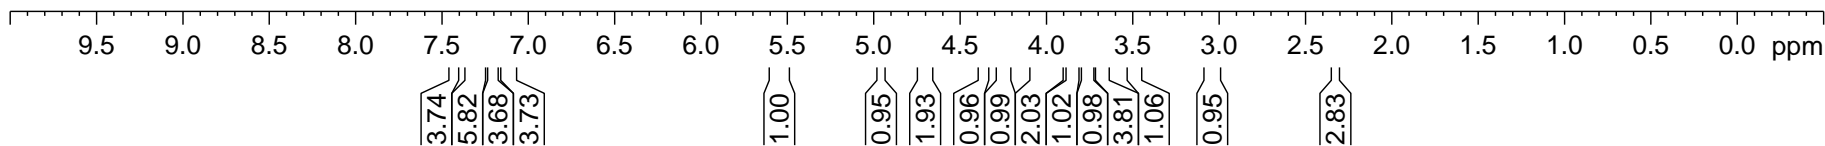

Current Data Parameters  
NAME vd-717-1 All  
EXPNO 2  
PROCNO 1

F2 - Acquisition Parameters  
Date\_ 20140811  
Time 21.55  
INSTRUM spect  
PROBHD 5 mm PABBO BB-  
PULPROG zgpg30  
TD 32768  
SOLVENT CDCl3  
NS 6500  
DS 0  
SWH 23148.148 Hz  
FIDRES 0.706425 Hz  
AQ 0.7078388 sec  
RG 2050  
DW 21.600 usec  
DE 8.50 usec  
TE 300.0 K  
D1 2.00000000 sec  
D11 0.03000000 sec  
TD0 1

===== CHANNEL f1 =====  
NUC1 13C  
P1 9.80 usec  
PL1 -2.00 dB  
PL1W 55.33689499 W  
SFO1 100.6238359 MHz

===== CHANNEL f2 =====  
CPDPRG2 waltz16  
NUC2 1H  
PCPD2 90.00 usec  
PL2 -2.00 dB  
PL12 13.70 dB  
PL13 16.70 dB  
PL2W 16.12334061 W  
PL12W 0.43396533 W  
PL13W 0.21749784 W  
SFO2 400.1326011 MHz

F2 - Processing parameters  
SI 16384  
SF 100.6127491 MHz  
WDW EM  
SSB 0  
LB 3.00 Hz  
GB 0  
PC 1.00

140.02  
139.95  
138.70  
137.95  
137.25  
133.91  
129.89  
129.25  
128.61  
128.47  
128.36  
128.29  
128.05  
127.49  
127.33  
126.15  
101.44

87.70  
87.64  
81.78  
81.57  
77.41  
76.36  
76.30  
74.95  
70.40  
68.77

53.89  
53.83

45.53

29.88

21.34

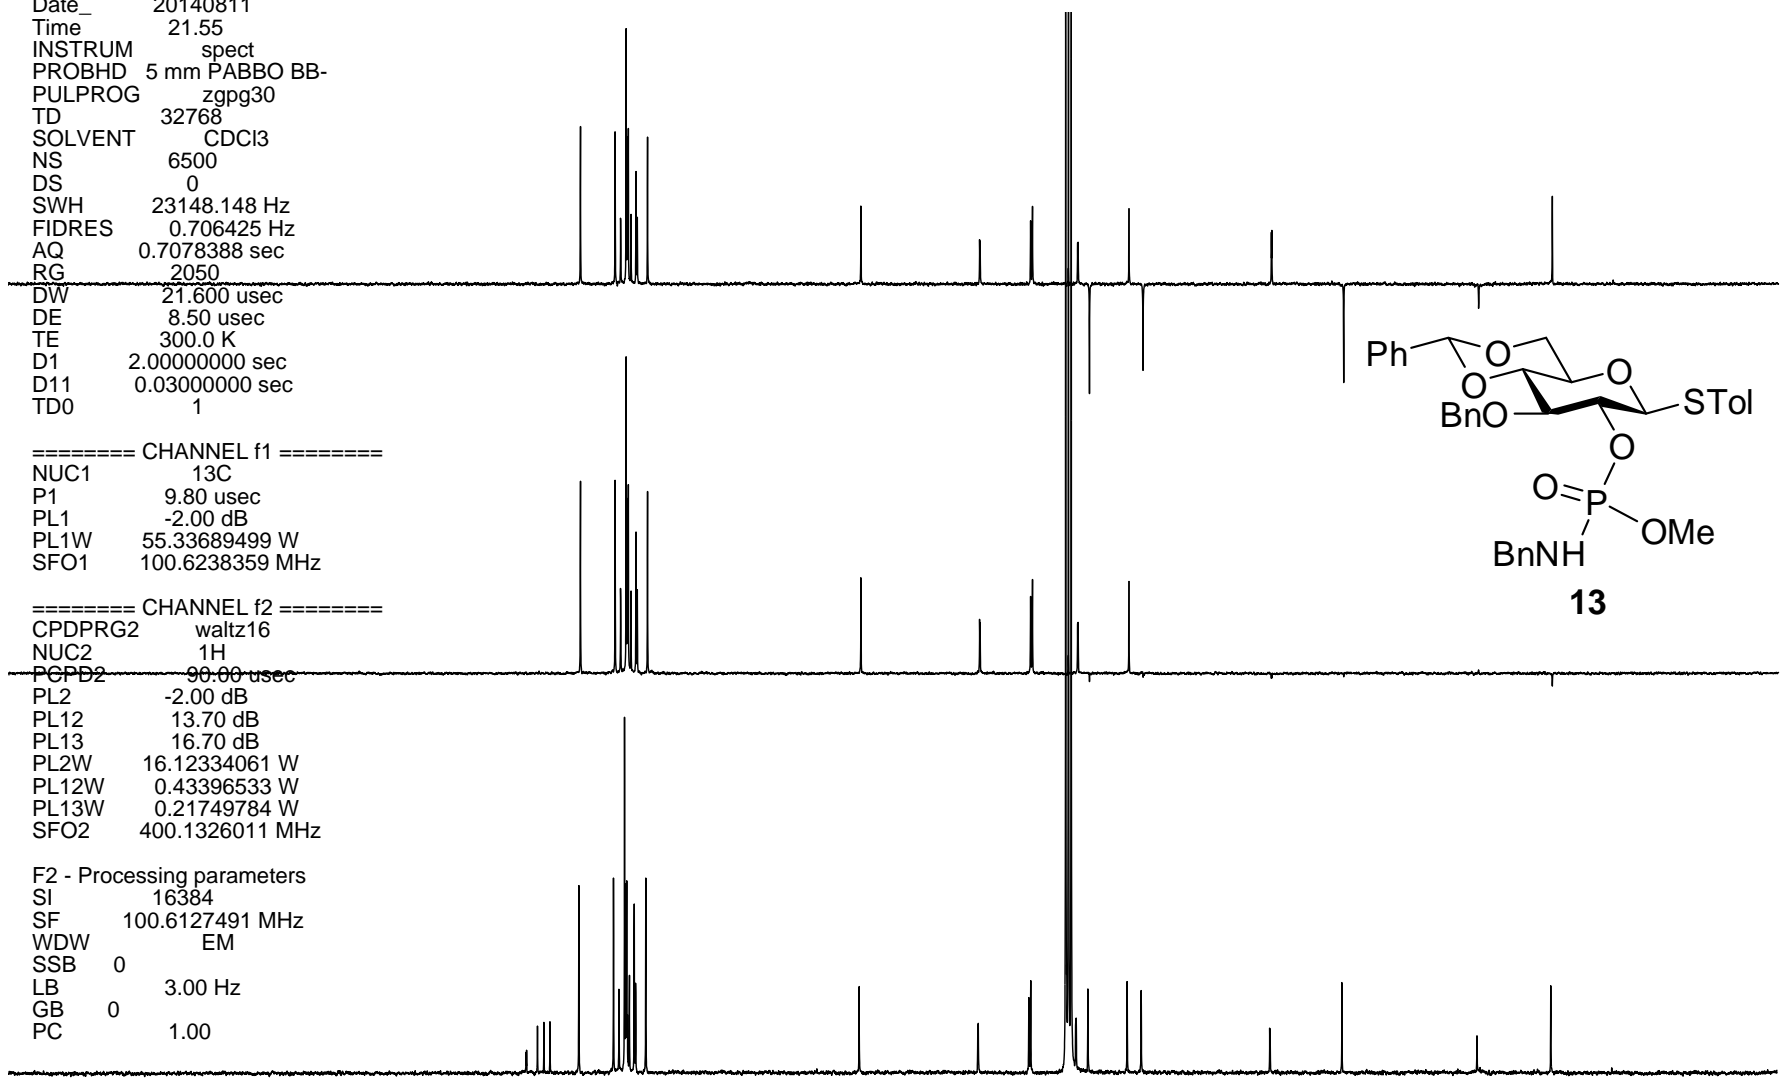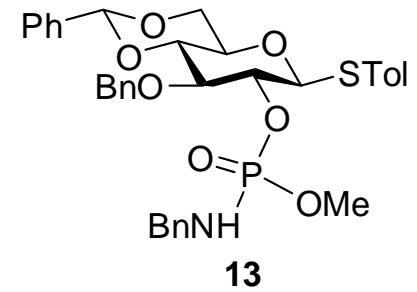

190 180 170 160 150 140 130 120 110 100 90 80 70 60 50 40 30 20 10 0 ppm

9.2025

Current Data Parameters

NAME vd-717-1 P31  
EXPNO 1  
PROCNO 1

F2 - Acquisition Parameters

Date\_ 20140811  
Time 21.44  
INSTRUM spect  
PROBHD 5 mm PABBO BB-  
PULPROG zgpg30  
TD 65536  
SOLVENT CDCl3  
NS 24  
DS 0  
SWH 104166.664 Hz  
FIDRES 1.589457 Hz  
AQ 0.3146228 sec  
RG 2050  
DW 4.800 usec  
DE 6.50 usec  
TE 300.0 K  
D1 2.00000000 sec  
D11 0.03000000 sec  
TD0 1

===== CHANNEL f1 =====

NUC1 31P  
P1 13.50 usec  
PL1 2.00 dB  
PL1W 16.00742149 W  
SFO1 161.9755930 MHz

===== CHANNEL f2 =====

CPDPRG2 waltz16  
NUC2 1H  
PCPD2 90.00 usec  
PL2 -2.00 dB  
PL12 13.70 dB  
PL13 16.70 dB  
PL2W 16.12334061 W  
PL12W 0.43396533 W  
PL13W 0.21749784 W  
SFO2 400.1320007 MHz

F2 - Processing parameters

SI 32768  
SF 161.9755127 MHz  
WDW EM  
SSB 0  
GB 0  
PC 1.00

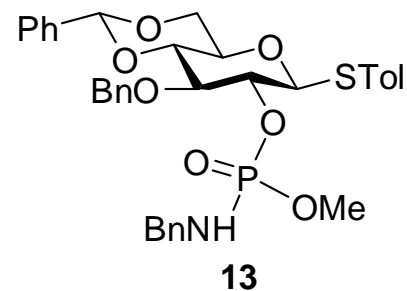

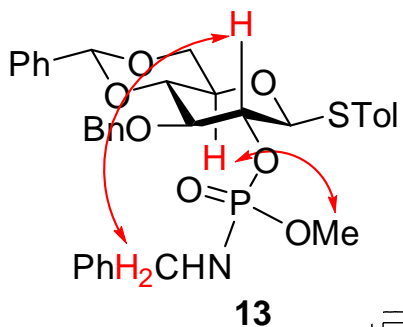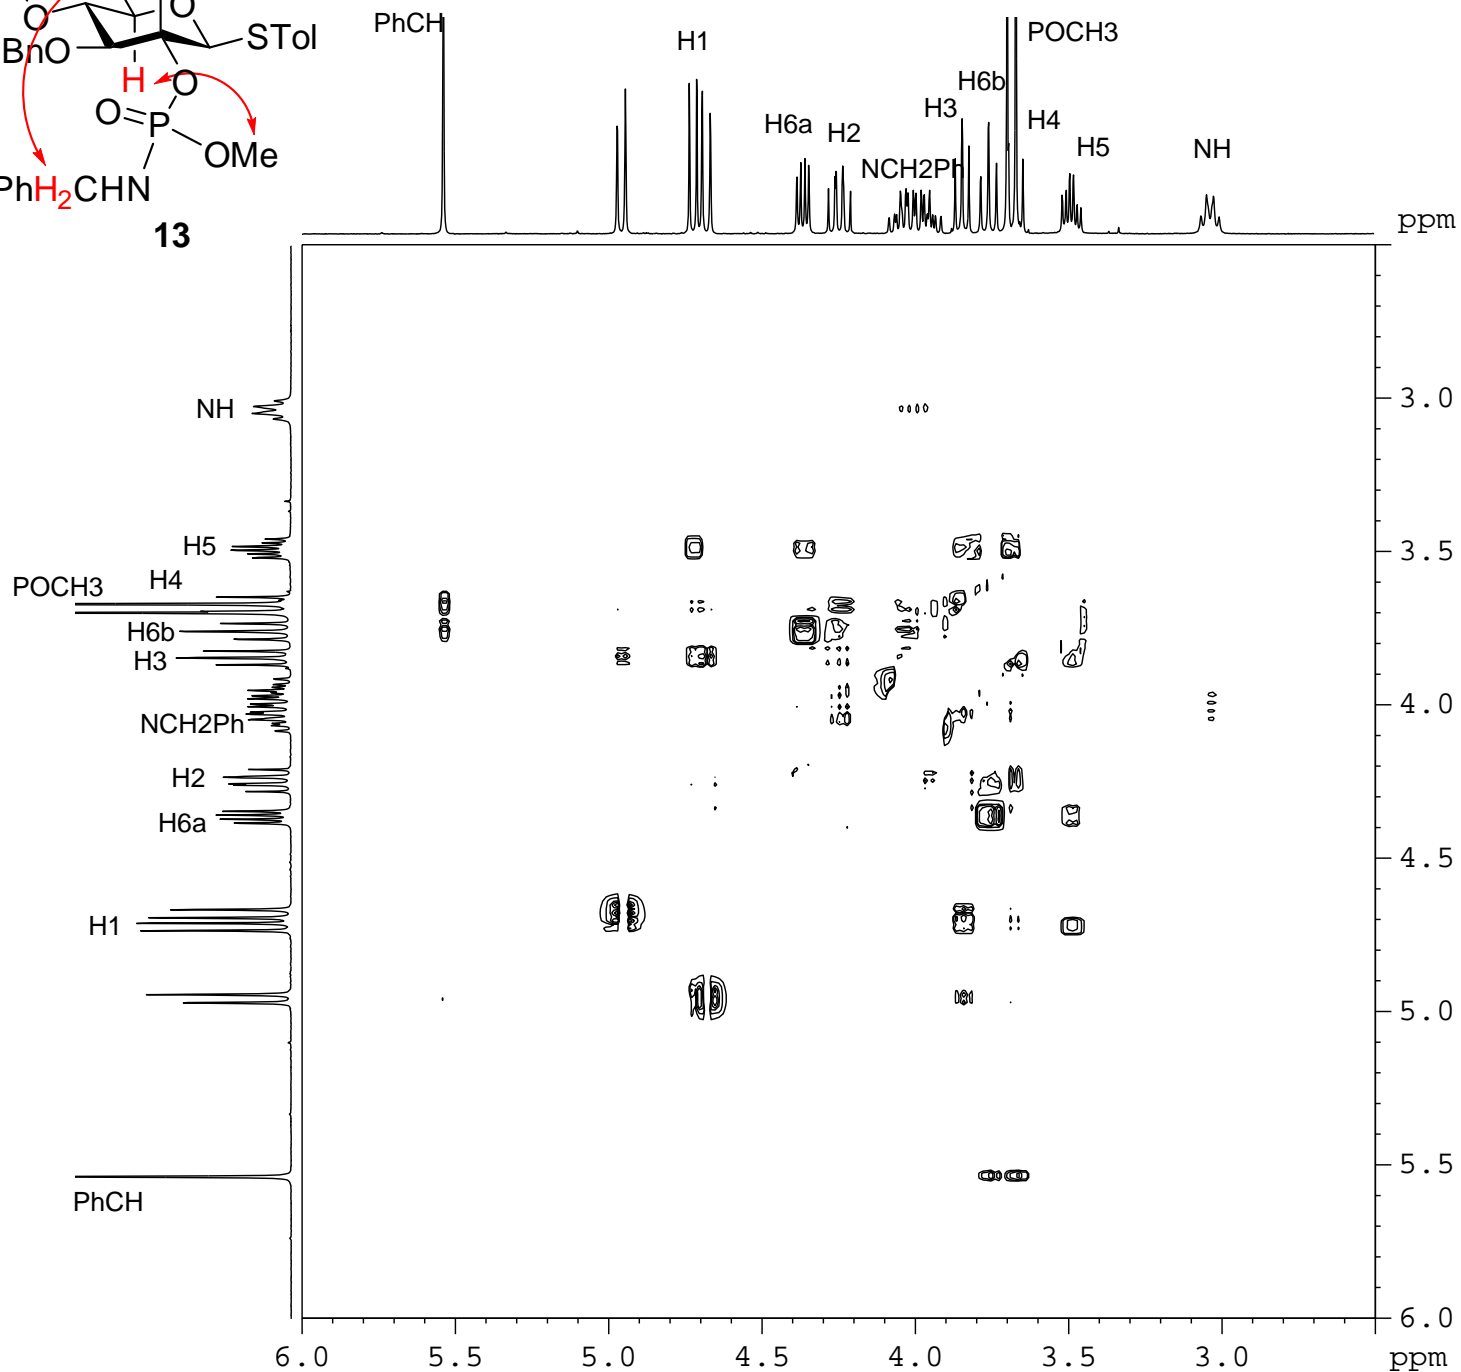

Current Data Parameters  
 NAME vd-717-1 All  
 EXPNO 7  
 PROCNO 1

F2 - Acquisition Parameters  
 Date\_ 20140812  
 Time 8.29  
 INSTRUM spect  
 PROBHD 5 mm PABBO BB-  
 PULPROG noesygpphpp  
 TD 2048  
 SOLVENT CDCl3  
 NS 4  
 DS 16  
 SWH 5197.505 Hz  
 FIDRES 2.537844 Hz  
 AQ 0.1970676 sec  
 RG 256  
 DW 96.200 usec  
 DE 6.50 usec  
 TE 300.0 K  
 D0 0.00007914 sec  
 D1 2.00000000 sec  
 D8 0.40000001 sec  
 D11 0.03000000 sec  
 D12 0.00002000 sec  
 D16 0.00020000 sec  
 IN0 0.00019240 sec

===== CHANNEL f1 =====  
 NUC1 1H  
 P1 13.40 usec  
 P2 26.80 usec  
 P17 2500.00 usec  
 PL1 -2.00 dB  
 PL10 3.30 dB  
 PL1W 16.12334061 W  
 PL10W 4.75833511 W  
 SFO1 400.1318006 MHz

===== GRADIENT CHANNEL =  
 GPNAM1 SMSQ10.100  
 GPNAM2 SMSQ10.100  
 GPZ1 40.00 %

7.4346  
7.4308  
7.4170  
7.4110  
7.3693  
7.3670  
7.3517  
7.3350  
7.3309  
7.3184  
7.3025  
7.2991  
7.2864  
7.2695  
7.2655  
7.2483  
7.2402  
7.2207  
7.2134  
7.2018  
7.1953  
7.1807  
7.1166  
7.1120  
7.0964  
7.0729  
5.4497  
5.4352  
4.7766  
4.7365  
4.7250  
4.7065  
4.7027  
4.6789  
4.6593  
4.6158  
4.6098  
4.5853  
4.5797  
4.5706  
4.2520  
4.2265  
3.9537  
3.9455  
3.9276  
3.8105  
3.6998  
3.6741  
3.6720  
3.6460  
3.6354  
3.6220  
3.6070  
3.5979  
3.5742  
3.5324  
3.5039  
3.3556

Current Data Parameters

NAME vd-718 all  
EXPNO 1  
PROCNO 1

F2 - Acquisition Parameters

Date\_ 20140815  
Time 21.52  
INSTRUM spect  
PROBHD 5 mm PABBO BB-  
PULPROG zg30  
TD 16384  
SOLVENT CDCl3  
NS 64  
DS 0  
SWH 5597.015 Hz  
FIDRES 0.341615 Hz  
AQ 1.4636873 sec  
RG 144  
DW 89.333 usec  
DE 6.50 usec  
TE 300.0 K  
D1 2.00000000 sec  
TD0 1

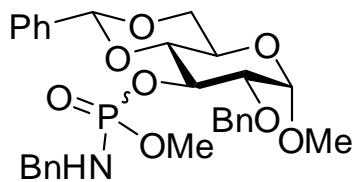

===== CHANNEL f1 =====

NUC1 1H  
P1 13.40 usec  
PL1 -2.00 dB  
PL1W 16.12334061 W  
SFO1 400.1326012 MHz

F2 - Processing parameters

SI 8192  
SF 400.1300175 MHz  
WDW no  
SSB 0  
LB 0 Hz  
GB 0  
PC 1.00



2.26  
6.89  
18.41  
3.90  
2.00  
0.86  
1.04  
6.26  
2.04  
4.09  
2.13  
2.33  
3.73  
2.52  
3.47  
6.48



Current Data Parameters  
NAME vd-718 all  
EXPNO 2  
PROCNO 1

F2 - Acquisition Parameters

Date\_ 20140815  
Time 22.06  
INSTRUM spect  
PROBHD 5 mm PABBO BB-  
PULPROG zgpg30  
TD 32768  
SOLVENT CDCl3  
NS 6000  
DS 0  
SWH 23148.148 Hz  
FIDRES 0.706425 Hz

AQ 0.7078388 sec  
RG 2050  
DW 21.600 usec  
DE 8.50 usec  
TE 300.0 K  
D1 2.00000000 sec  
D11 0.03000000 sec  
TD0 1

==== CHANNEL f1 =====

NUC1 13C  
P1 9.80 usec  
PL1 -2.00 dB  
PL1W 55.33689499 W  
SFO1 100.6238359 MHz

==== CHANNEL f2 =====

CPDPRG2 waltz16  
NUC2 1H  
PCPD2 90.00 usec  
PL2 -2.00 dB  
PL12 13.70 dB  
PL13 16.70 dB  
PL2W 16.12334061 W  
PL12W 0.43396533 W  
PL13W 0.21749784 W  
SFO2 400.1326011 MHz

F2 - Processing parameters

SI 16384  
SF 100.6127707 MHz  
WDW EM  
SSB 0  
LB 3.00 Hz  
GB 0  
PC 1.00

139.90  
139.84  
137.63  
137.40  
136.83  
136.61  
129.21  
128.51  
128.30  
128.17  
128.10  
127.29  
126.99  
126.24  
126.06  
102.05  
101.90  
98.85  
98.73  
80.43  
80.35  
78.61  
77.31  
77.20  
76.99  
76.68  
75.76  
75.69  
75.32  
75.25  
73.60  
73.24  
68.91  
62.19  
62.09  
55.40  
53.63  
53.55  
53.49  
45.05

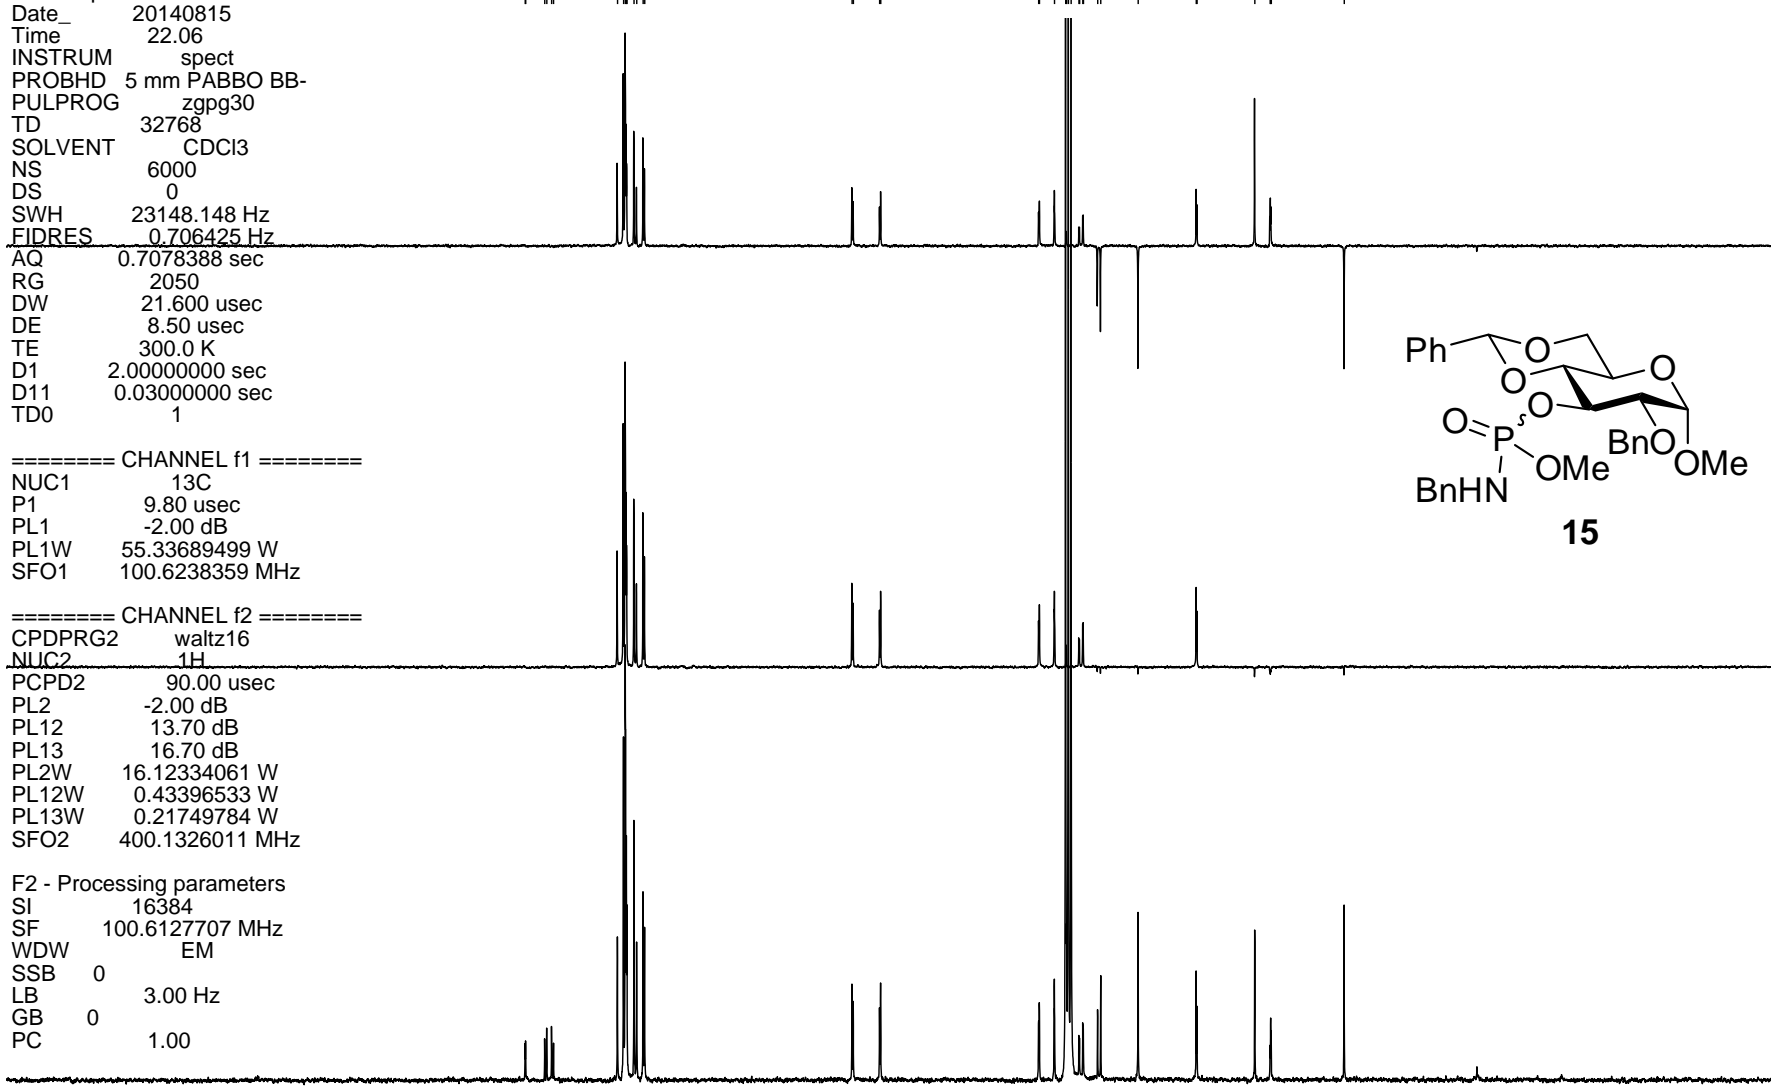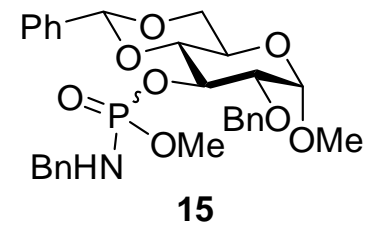

190 180 170 160 150 140 130 120 110 100 90 80 70 60 50 40 30 20 10 0 ppm

Current Data Parameters

NAME vd-718 P31  
EXPNO 1  
PROCNO 1

F2 - Acquisition Parameters

Date\_ 20140815  
Time 21.46  
INSTRUM spect  
PROBHD 5 mm PABBO BB-  
PULPROG zgpg30  
TD 65536  
SOLVENT CDCl3  
NS 16  
DS 0  
SWH 104166.664 Hz  
FIDRES 1.589457 Hz  
AQ 0.3146228 sec  
RG 2050  
DW 4.800 usec  
DE 6.50 usec  
TE 300.0 K  
D1 2.00000000 sec  
D11 0.03000000 sec  
TD0 1

==== CHANNEL f1 =====

NUC1 31P  
P1 13.50 usec  
PL1 2.00 dB  
PL1W 16.00742149 W  
SFO1 161.9755930 MHz

==== CHANNEL f2 =====

CPDPRG2 waltz16  
NUC2 1H  
PCPD2 90.00 usec  
PL2 -2.00 dB  
PL12 13.70 dB  
PL13 16.70 dB  
PL2W 16.12334061 W  
PL12W 0.43396533 W  
PL13W 0.21749784 W  
SFO2 400.1320007 MHz

F2 - Processing parameters

SI 32768  
SF 161.9755127 MHz  
WDW EM  
SSB 0  
GB 0  
PC 1.00

9.7690  
9.0219

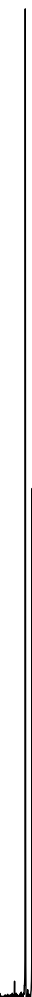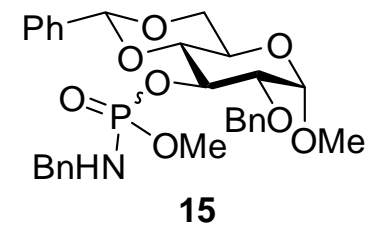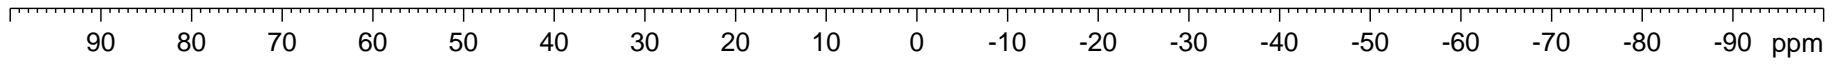

7.3682  
7.3507  
7.3152  
7.3118  
7.3041  
7.2900  
7.2842  
7.2721  
7.2686  
7.2541  
7.2392  
7.2320  
7.2248  
7.2141  
7.2084  
7.2041  
7.1959  
7.1912  
7.0097  
7.0012  
6.9910  
6.9862  
5.0280  
5.0012  
4.7383  
4.7082  
4.6831  
4.6537  
4.6220  
4.6114  
4.5954  
4.5926  
4.5467  
4.5173  
4.2715  
4.2478  
3.9404  
3.9315  
3.9166  
3.9067  
3.8993  
3.8934  
3.8885  
3.8703  
3.8493  
3.8447  
3.8350  
3.8214  
3.8026  
3.7788  
3.7672  
3.7524  
3.5438  
3.5350  
3.5197  
3.5095  
3.4808  
3.3764

Current Data Parameters  
NAME vd-719-1 AV400  
EXPNO 1  
PROCNO 1

F2 - Acquisition Parameters  
Date\_ 20140815  
Time 22.01  
INSTRUM spect  
PROBHD 5 mm Dual 13C/  
PULPROG zg30  
TD 16384  
SOLVENT CDCl3  
NS 64  
DS 2  
SWH 4789.272 Hz  
FIDRES 0.292314 Hz  
AQ 1.7105396 sec  
RG 228.1  
DW 104.400 usec  
DE 6.50 usec  
TE 299.6 K  
D1 1.00000000 sec  
TD0 1

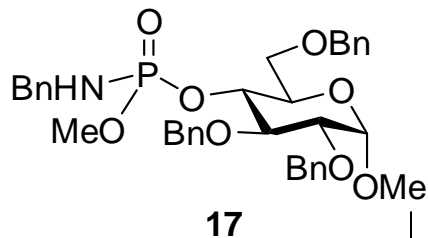

===== CHANNEL f1 =====

NUC1 1H  
P1 10.30 usec  
PL1 -2.00 dB  
PL1W 23.88643074 W  
SFO1 400.1320424 MHz

F2 - Processing parameters  
SI 16384  
SF 400.1300175 MHz  
WDW no  
SSB 0  
LB 0 Hz  
GB 0  
PC 1.00

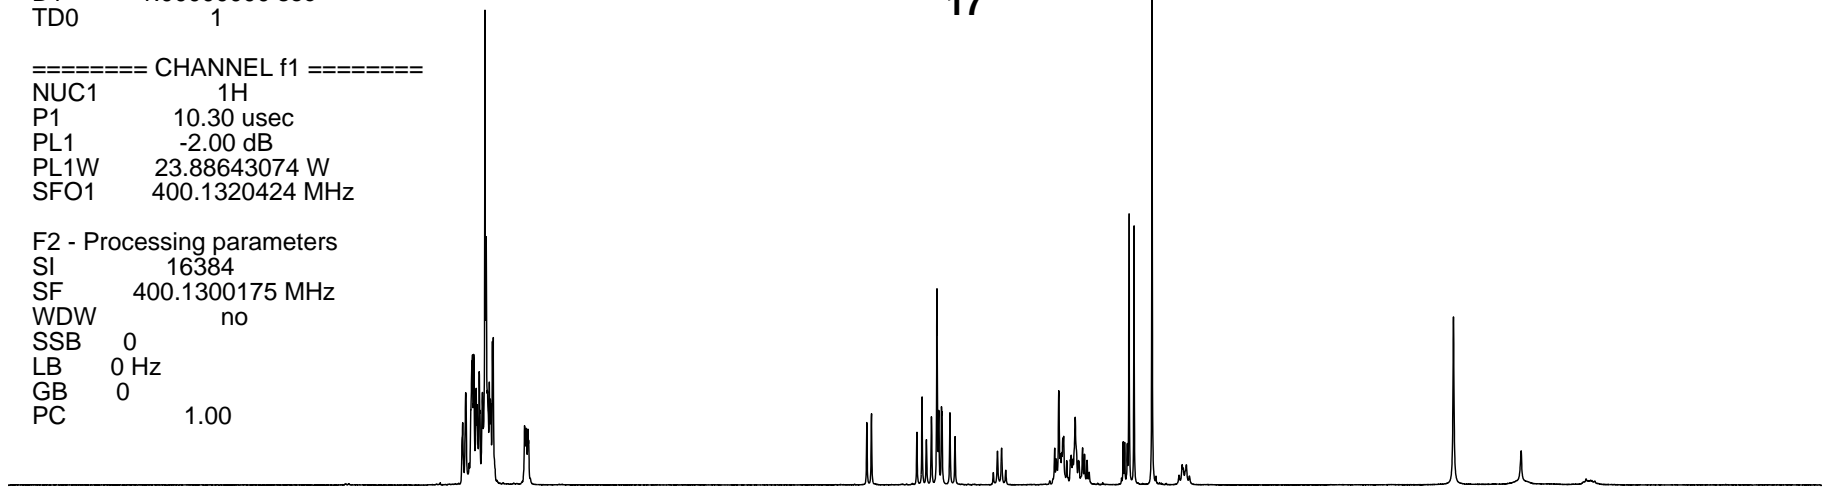

9.5 9.0 8.5 8.0 7.5 7.0 6.5 6.0 5.5 5.0 4.5 4.0 3.5 3.0 2.5 2.0 1.5 1.0 0.5 0.0 ppm

18.65  
1.98  
1.00  
1.03  
1.02  
3.02  
1.01  
1.02  
2.97  
3.17  
0.83  
3.17  
2.94  
0.99

Current Data Parameters  
NAME vd-719-1 AV400  
EXPNO 8  
PROCNO 1

F2 - Acquisition Parameters  
Date\_ 20140816  
Time 9.10  
INSTRUM spect  
PROBHD 5 mm Dual 13C/  
PULPROG zg0dc  
TD 32768  
SOLVENT CDCl3  
NS 4252  
DS 2  
SWH 23980.814 Hz  
FIDRES 0.731836 Hz  
AQ 0.6832628 sec  
RG 18390.4  
DW 20.850 usec  
DE 6.50 usec  
TE 300.3 K  
D1 3.00000000 sec  
D11 0.03000000 sec  
TDO 1

=====  
CHANNEL f1  
=====  
NUC1 13C  
P0 13.00 usec  
PL1 -3.00 dB  
PL1W 75.17808533 W  
SFO1 100.6228293 MHz

=====  
CHANNEL f2  
=====  
CPDPRG2 waltz16  
NUC2 1H  
PCPD2 90.00 usec  
PL2 -2.00 dB  
PL12 15.90 dB  
PL2W 23.88643074 W  
PL12W 0.38739258 W  
SFO2 400.1318764 MHz

F2 - Processing parameters  
SI 32768  
SF 100.6127503 MHz  
WDW EM  
SSB 0  
LB 3.00 Hz  
GB 0  
PC 1.40

140.07  
140.01  
138.55  
138.20  
137.94  
128.70  
128.53  
128.40  
128.33  
128.27  
128.15  
128.13  
128.05  
127.63  
127.49  
127.22  
97.87  
80.63  
80.14  
77.41  
75.97  
73.75  
73.69  
73.61  
73.37  
69.87  
69.83  
68.66  
55.55  
53.36  
53.31  
45.48

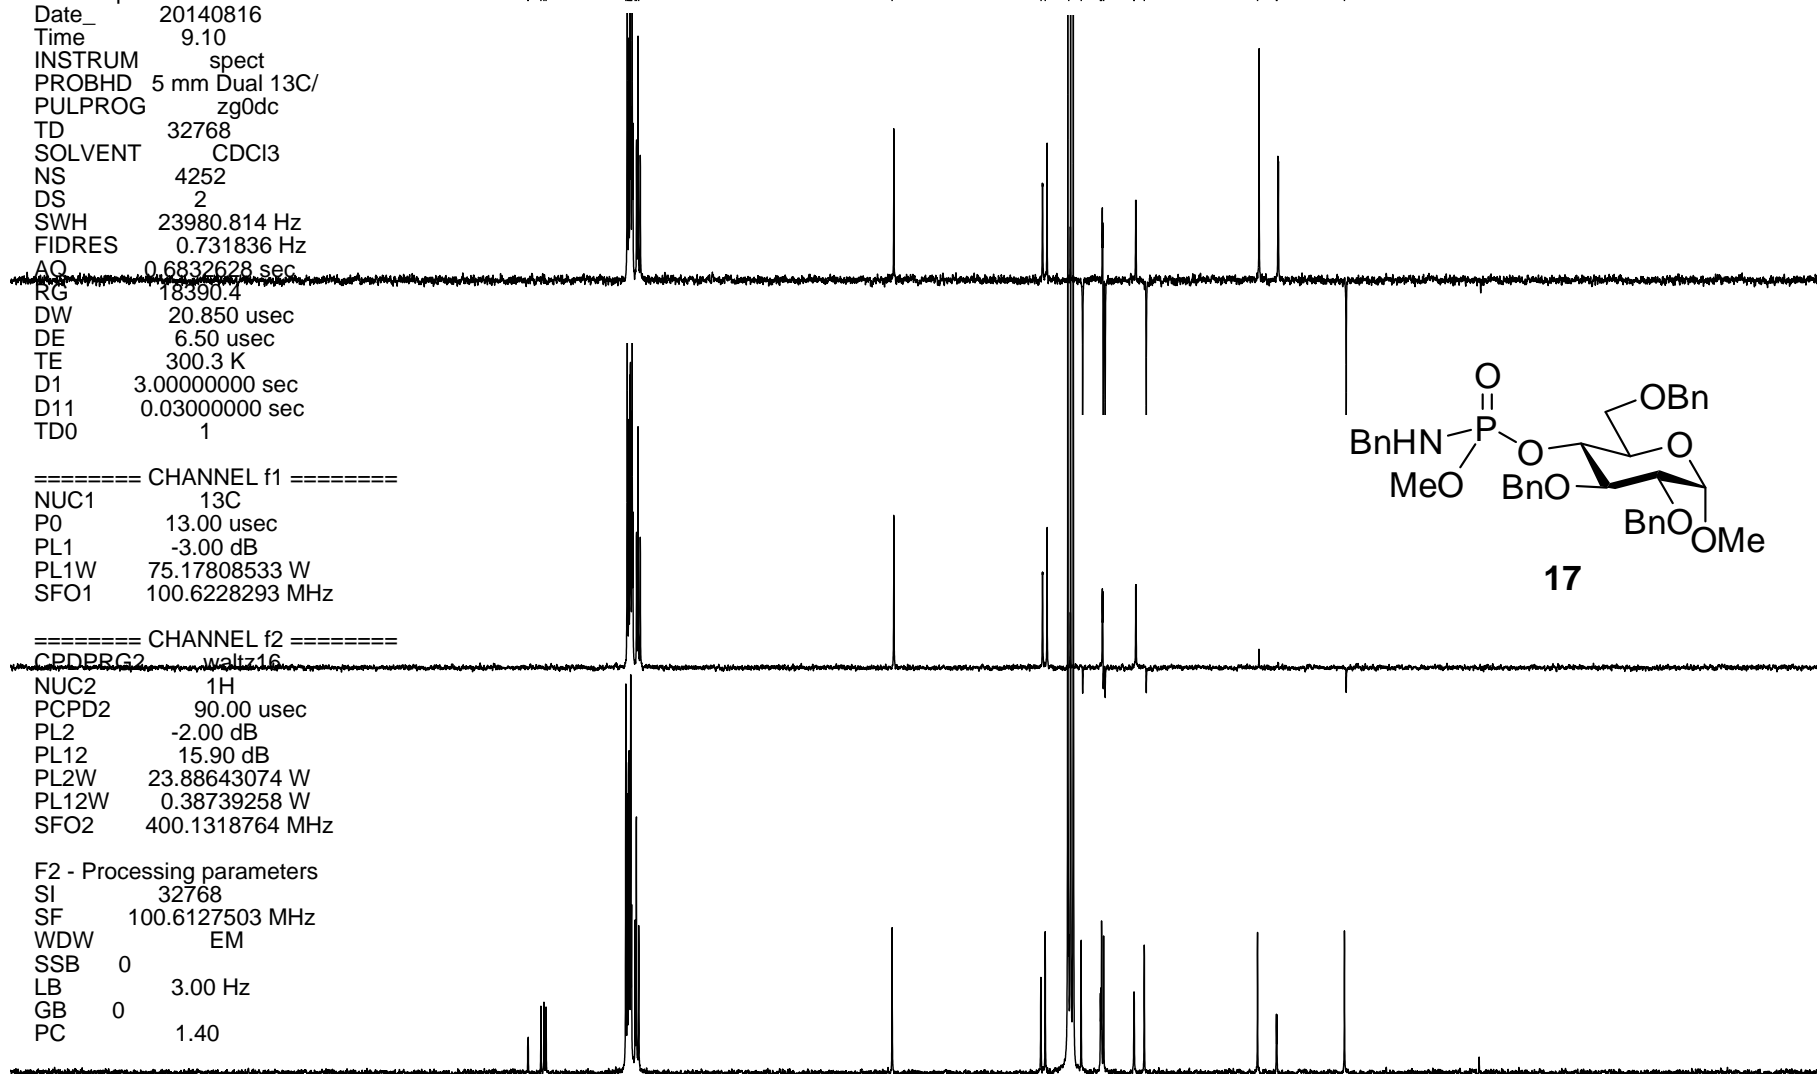

190 180 170 160 150 140 130 120 110 100 90 80 70 60 50 40 30 20 10 0 ppm

Current Data Parameters

NAME vd-719-1 P31  
EXPNO 2  
PROCNO 1

F2 - Acquisition Parameters

Date\_ 20140815  
Time 21.43  
INSTRUM spect  
PROBHD 5 mm PABBO BB-  
PULPROG zgpg30  
TD 65536  
SOLVENT CDCl3  
NS 16  
DS 0  
SWH 104166.664 Hz  
FIDRES 1.589457 Hz  
AQ 0.3146228 sec  
RG 2050  
DW 4.800 usec  
DE 6.50 usec  
TE 300.0 K  
D1 2.00000000 sec  
D11 0.03000000 sec  
TD0 1

===== CHANNEL f1 =====

NUC1 31P  
P1 13.50 usec  
PL1 2.00 dB  
PL1W 16.00742149 W  
SFO1 161.9755930 MHz

===== CHANNEL f2 =====

CPDPRG2 waltz16  
NUC2 1H  
PCPD2 90.00 usec  
PL2 -2.00 dB  
PL12 13.70 dB  
PL13 16.70 dB  
PL2W 16.12334061 W  
PL12W 0.43396533 W  
PL13W 0.21749784 W  
SFO2 400.1320007 MHz

F2 - Processing parameters

SI 32768  
SF 161.9755127 MHz  
WDW EM  
SSB 0  
GB 0  
PC 1.00

10.4202

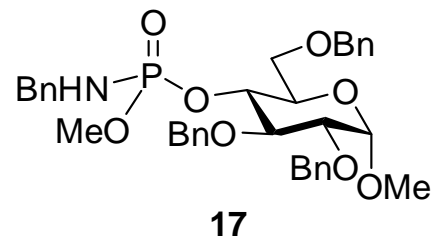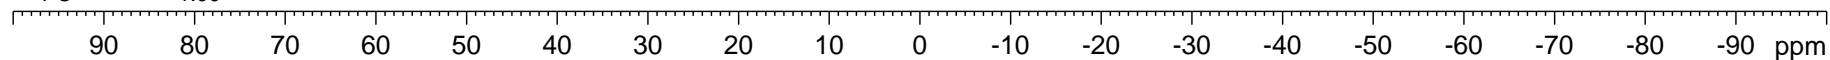

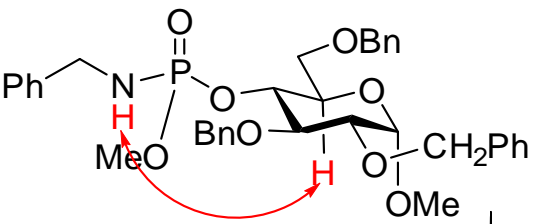

17

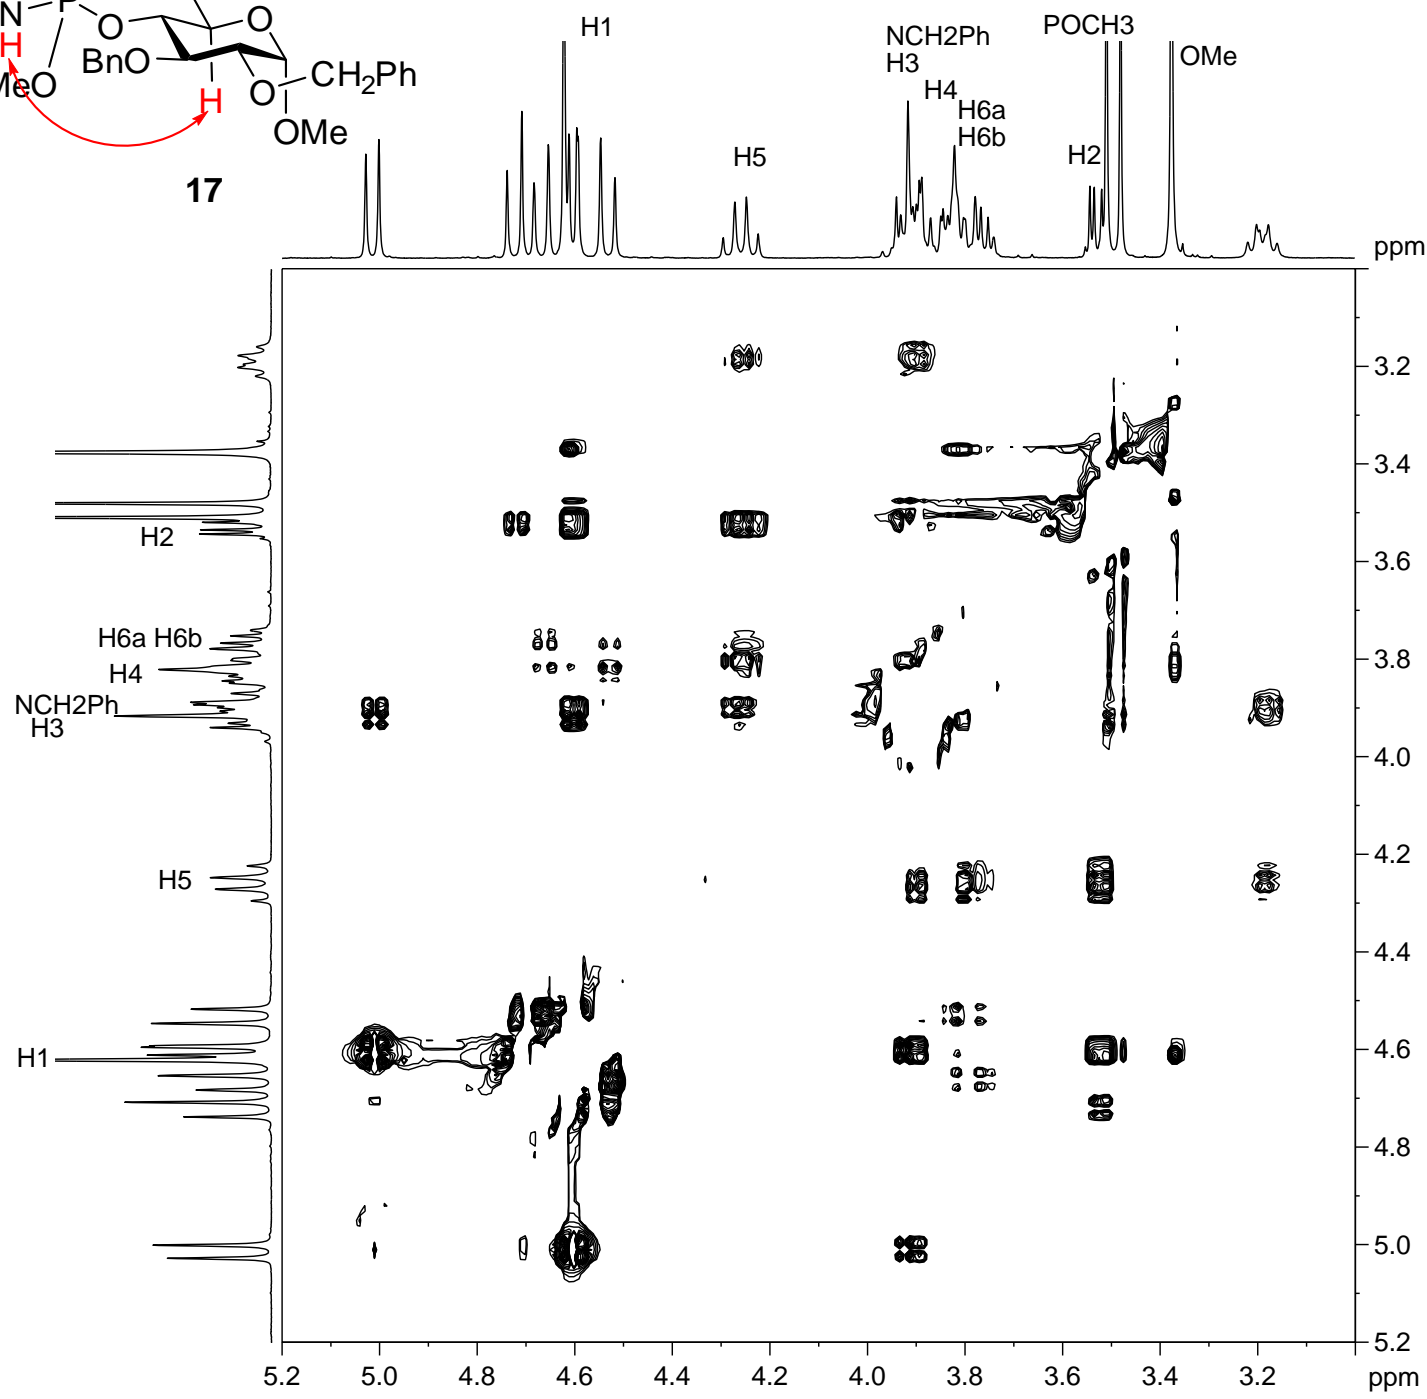

Current Data Parameters  
 NAME vd-719-1 AV400  
 EXPNO 4  
 PROCNO 1

F2 - Acquisition Parameters  
 Date\_ 20140815  
 Time 23.05  
 INSTRUM spect  
 PROBHD 5 mm Dual 13C/  
 PULPROG noesygpph  
 TD 2048  
 SOLVENT CDCl3  
 NS 4  
 DS 16  
 SWH 4084.967 Hz  
 FIDRES 1.994613 Hz  
 AQ 0.2507252 sec  
 RG 812.7  
 DW 122.400 usec  
 DE 6.50 usec  
 TE 299.8 K  
 D0 0.00010929 sec  
 D1 1.50000000 sec  
 D8 0.80000001 sec  
 D16 0.00020000 sec  
 IN0 0.00024480 sec

===== CHANNEL f1 =====  
 NUC1 1H  
 P1 10.30 usec  
 P2 20.60 usec  
 PL1 -2.00 dB  
 PL1W 23.88643074 W  
 SFO1 400.1318806 MHz

===== GRADIENT CHANNEL =  
 GPNAM1 SINE.100  
 GPZ1 40.00 %  
 P16 1000.00 usec

F1 - Acquisition parameters  
 TD 256  
 SFO1 400.1319 MHz  
 FIDRES 15.956903 Hz

7.2905  
7.2795  
7.2724  
7.2398  
7.2275  
7.2174  
7.2127  
5.8552  
5.8465  
5.7691  
5.7601  
4.8124  
4.8036  
4.7531  
4.7457  
4.7384  
4.7333  
4.7273  
4.6662  
4.6571  
4.1871  
4.1731  
4.1669  
4.1528  
4.1187  
4.0999  
4.0955  
4.0883  
4.0826  
4.0643  
4.0574  
4.0441  
4.0370  
4.0317  
4.0209  
4.0162  
4.0096  
3.9942  
3.9496  
3.9382  
3.9264  
3.9167  
3.9042  
3.7003  
3.6718  
3.6675  
3.6388  
3.6042  
2.1918  
1.4482  
1.4313  
1.3034  
1.2574  
1.2245  
1.2076  
1.1964  
1.1747  
1.1244

Current Data Parameters

NAME GPM-161 all  
EXPNO 1  
PROCNO 1

F2 - Acquisition Parameters

Date\_ 20140814  
Time 21.30  
INSTRUM spect  
PROBHD 5 mm PABBO BB-  
PULPROG zg30  
TD 16384  
SOLVENT CDCl3  
NS 64  
DS 0  
SWH 5597.015 Hz  
FIDRES 0.341615 Hz  
AQ 1.4636873 sec  
RG 45.2  
DW 89.333 usec  
DE 6.50 usec  
TE 300.0 K  
D1 2.00000000 sec  
TD0 1

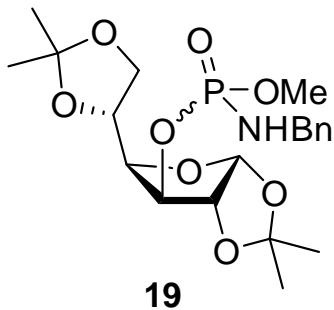

==== CHANNEL f1 =====

NUC1 1H  
P1 13.40 usec  
PL1 -2.00 dB  
PL1W 16.12334061 W  
SFO1 400.1326012 MHz

F2 - Processing parameters

SI 8192  
SF 400.1300175 MHz  
WDW EM  
SSB 0  
LB 0 Hz  
GB 0  
PC 1.00

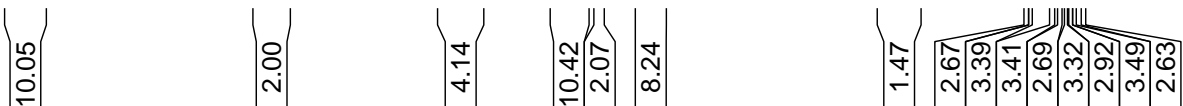

Current Data Parameters

NAME GPM-161 all  
 EXPNO 2  
 PROCNO 1

F2 - Acquisition Parameters

Date\_ 20140814  
 Time 21.34  
 INSTRUM spect  
 PROBHD 5 mm PABBO BB-  
 PULPROG zgpg30  
 TD 32768  
 SOLVENT CDCl3  
 NS 6000  
 DS 0  
 SWH 23148.148 Hz  
 FIDRES 0.706425 Hz  
 AQ 0.7078388 sec  
 RG 2050  
 DW 21.600 usec  
 DE 8.50 usec  
 TE 300.0 K  
 D1 2.00000000 sec  
 D11 0.03000000 sec  
 TD0 1

==== CHANNEL f1 =====

NUC1 13C  
 P1 9.80 usec  
 PL1 -2.00 dB  
 PL1W 55.33689499 W  
 SFO1 100.6238359 MHz

==== CHANNEL f2 =====

CPDPRG2 waltz16  
 NUC2 1H  
 PCPD2 90.00 usec  
 PL2 -2.00 dB  
 PL12 13.70 dB  
 PL13 16.70 dB  
 PL2W 16.12334061 W  
 PL12W 0.43396533 W  
 PL13W 0.21749784 W  
 SFO2 400.1326011 MHz

F2 - Processing parameters

SI 16384  
 SF 100.6127562 MHz  
 WDW EM  
 SSB 0  
 LB 3.00 Hz  
 GB 0  
 PC 1.00

139.61 139.56 139.51 128.71 127.57 127.45 112.44 112.32 109.53 109.43 105.33 105.24 83.88 83.67 80.85 80.77 80.68 79.56 79.50 78.49 78.44 72.45 72.30 67.61 67.45 53.54 53.49 45.37 45.25 26.88 26.83 26.73 26.33 25.25

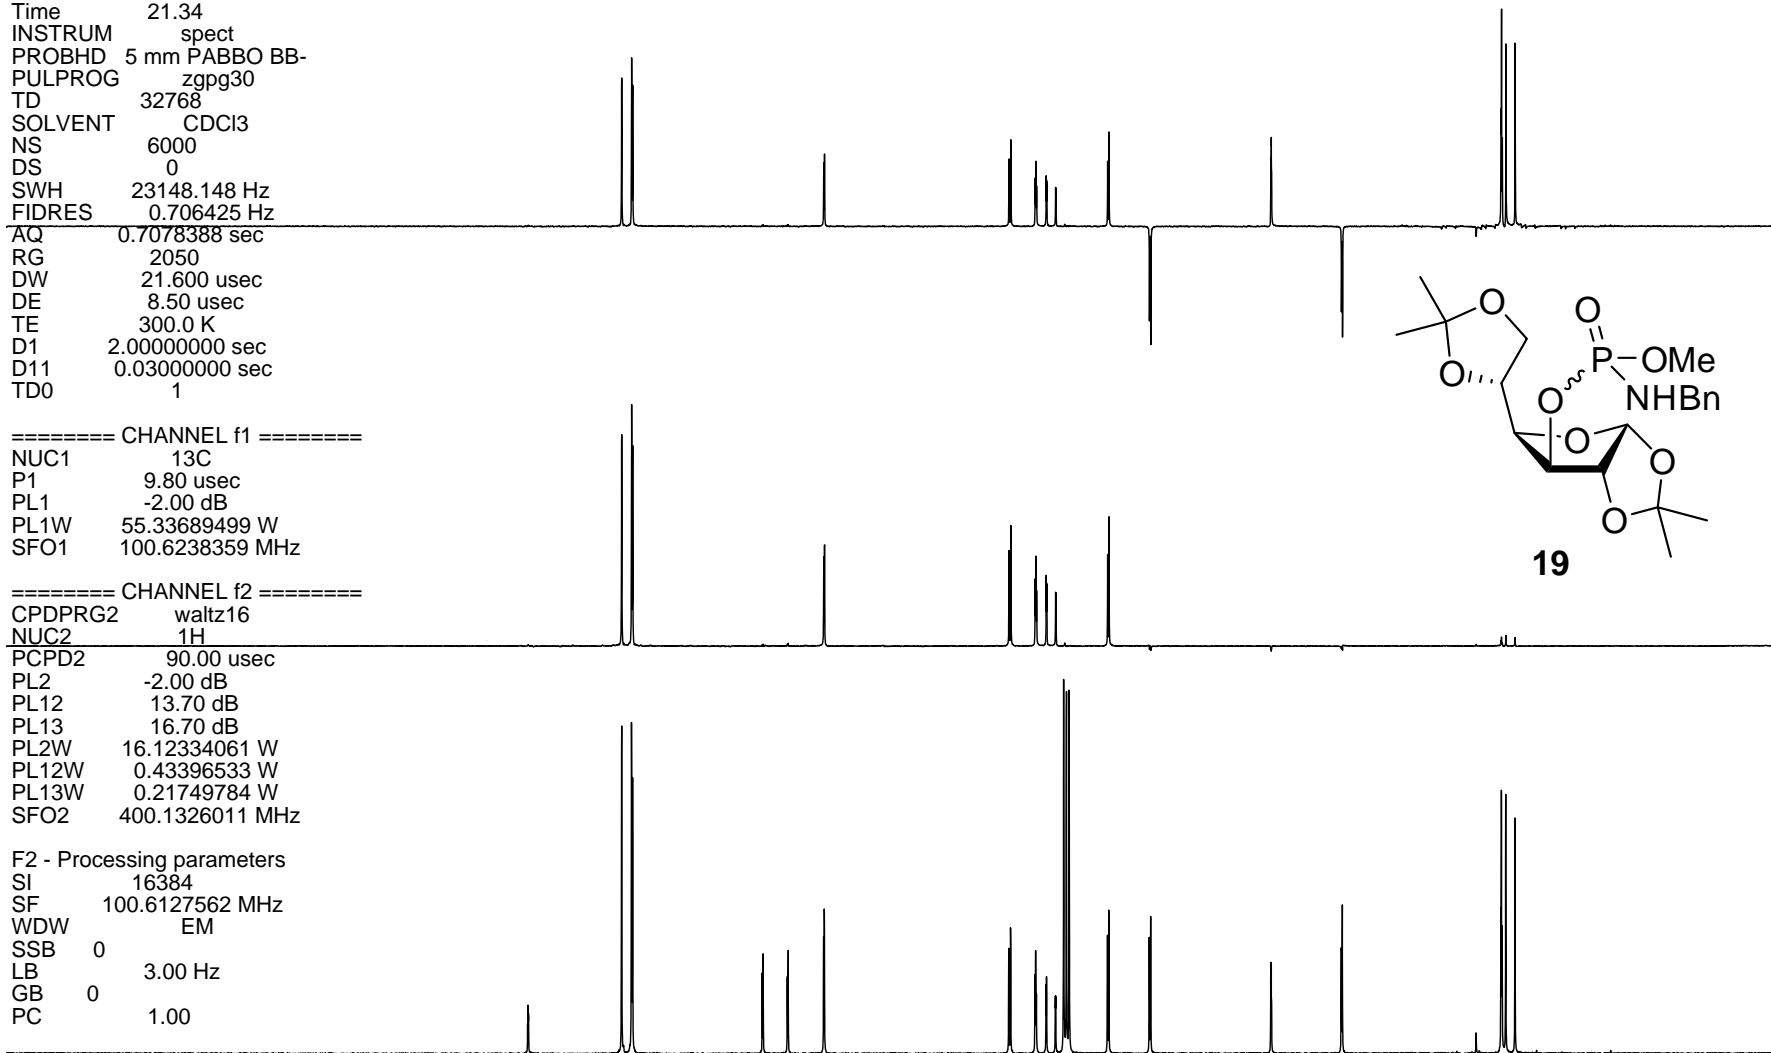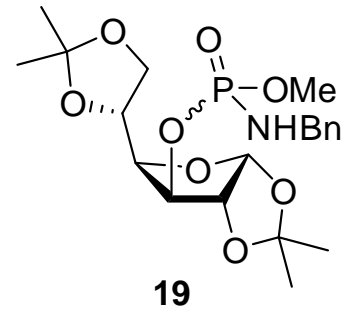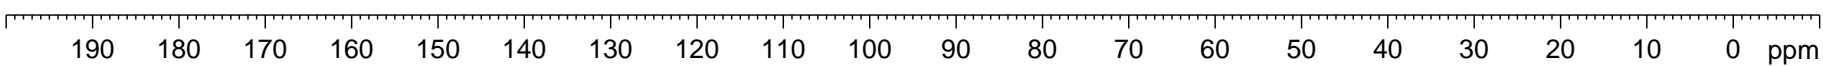



Current Data Parameters  
NAME GPM-161 P31  
EXPNO 2  
PROCNO 1

F2 - Acquisition Parameters  
Date\_ 20140814  
Time 21.25  
INSTRUM spect  
PROBHD 5 mm PABBO BB-  
PULPROG zgpg30  
TD 65536  
SOLVENT CDCl3  
NS 24  
DS 0  
SWH 104166.664 Hz  
FIDRES 1.589457 Hz  
AQ 0.3146228 sec  
RG 2050  
DW 4.800 usec  
DE 6.50 usec  
TE 300.0 K  
D1 2.00000000 sec  
D11 0.03000000 sec  
TD0 1

=====  
CHANNEL f1  
NUC1 31P  
P1 13.50 usec  
PL1 2.00 dB  
PL1W 16.00742149 W  
SFO1 161.9755930 MHz

=====  
CHANNEL f2  
CPDPRG2 waltz16  
NUC2 1H  
PCPD2 90.00 usec  
PL2 -2.00 dB  
PL12 13.70 dB  
PL13 16.70 dB  
PL2W 16.12334061 W  
PL12W 0.43396533 W  
PL13W 0.21749784 W  
SFO2 400.1320007 MHz

F2 - Processing parameters  
SI 32768  
SF 161.9755127 MHz  
WDW EM  
SSB 0  
GB 0  
PC 1.00

10.5073  
9.2506

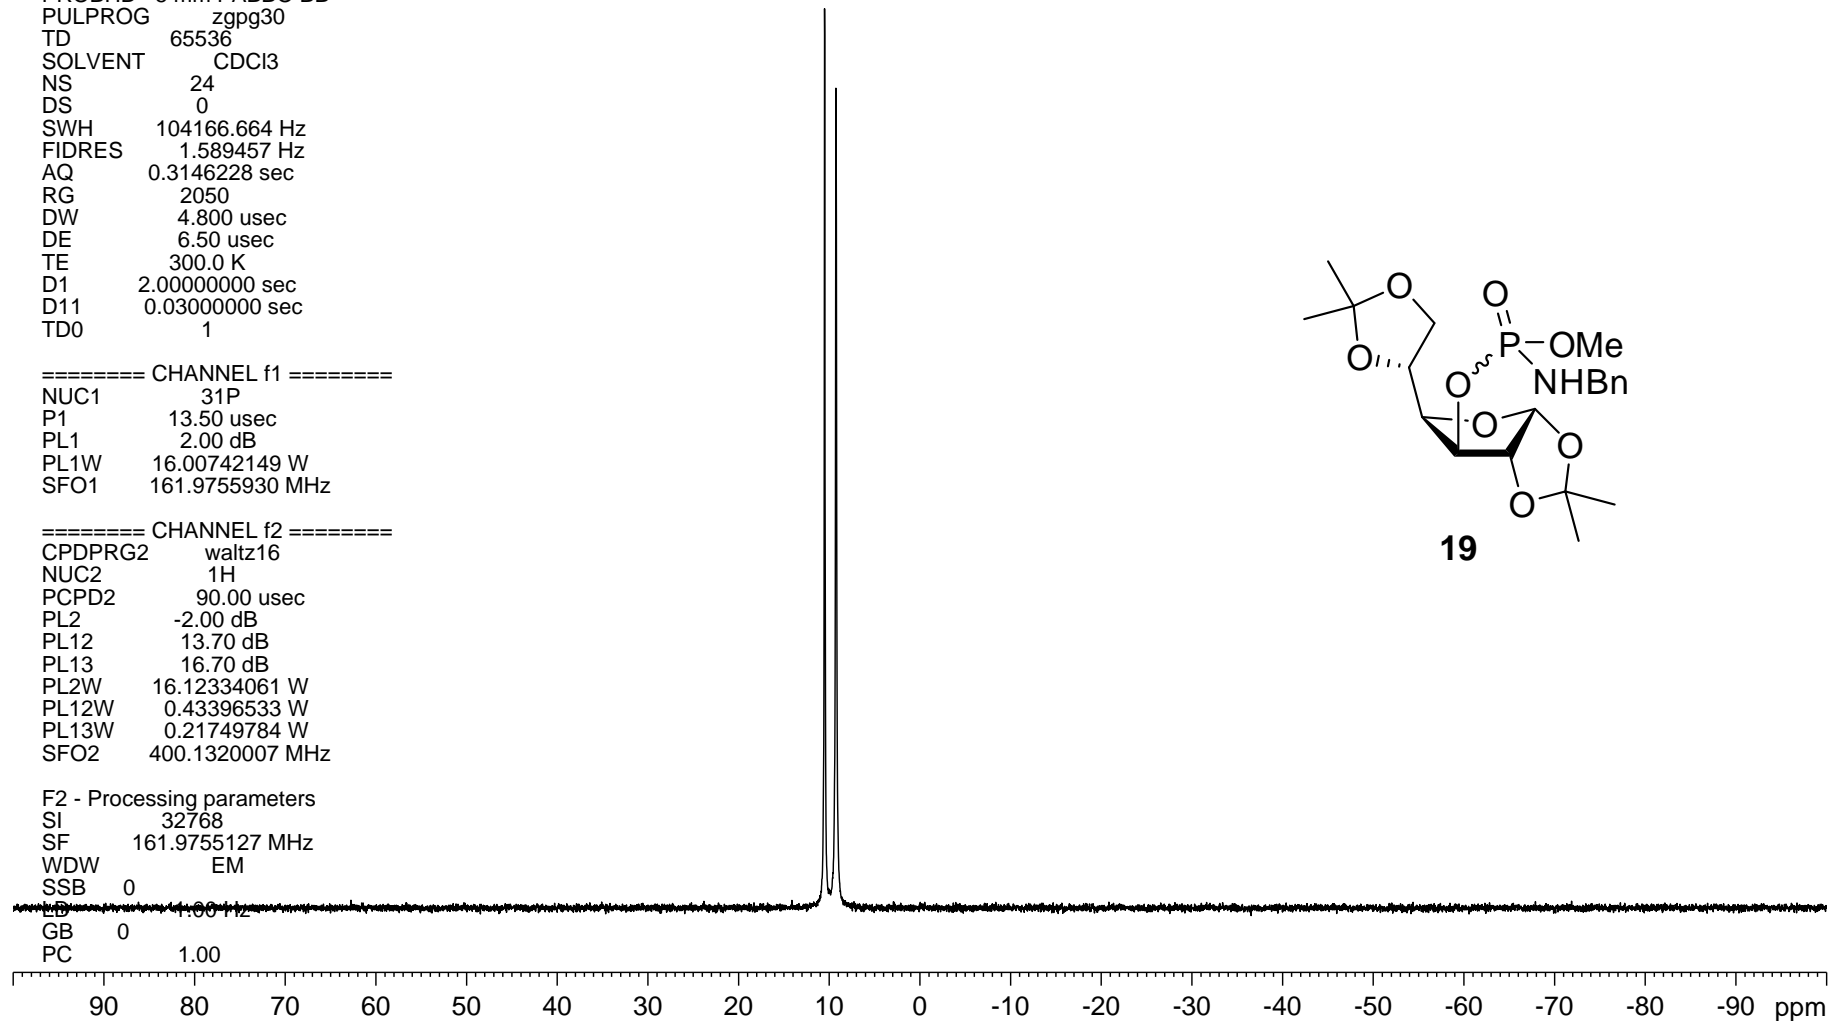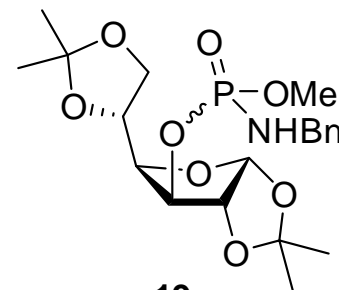

7.3317  
7.3202  
7.3005  
7.2908  
7.2842  
7.2633  
7.2462  
7.2401  
7.2339  
7.2269  
7.2166  
6.0799  
6.0610  
5.9322  
5.9136  
5.0933  
5.0813  
4.5330  
4.5156  
4.3496  
4.3413  
4.3218  
4.2998  
4.2919  
4.2672  
4.2608  
4.2499  
4.2424  
4.2350  
4.2233  
4.2167  
4.0263  
4.0002  
3.7330  
3.7163  
3.6820  
3.6506  
3.6223  
3.5948  
3.1742

Current Data Parameters

NAME GPM\_169-all  
EXPNO 1  
PROCNO 1

F2 - Acquisition Parameters

Date\_ 20140824  
Time 19.29  
INSTRUM spect  
PROBHD 5 mm PABBO BB-  
PULPROG zg30  
TD 16384  
SOLVENT CDCl3  
NS 16  
DS 0  
SWH 5597.015 Hz  
FIDRES 0.341615 Hz  
AQ 1.4636873 sec  
RG 114  
DW 89.333 usec  
DE 6.50 usec  
TE 300.0 K  
D1 2.00000000 sec  
TD0 1

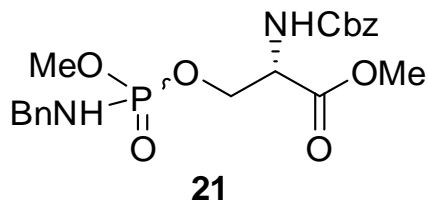

==== CHANNEL f1 =====

NUC1 1H  
P1 13.40 usec  
PL1 -2.00 dB  
PL1W 16.12334061 W  
SFO1 400.1326012 MHz

F2 - Processing parameters

SI 8192  
SF 400.1300175 MHz  
WDW no  
SSB 0  
LB 0 Hz  
GB 0  
PC 1.00

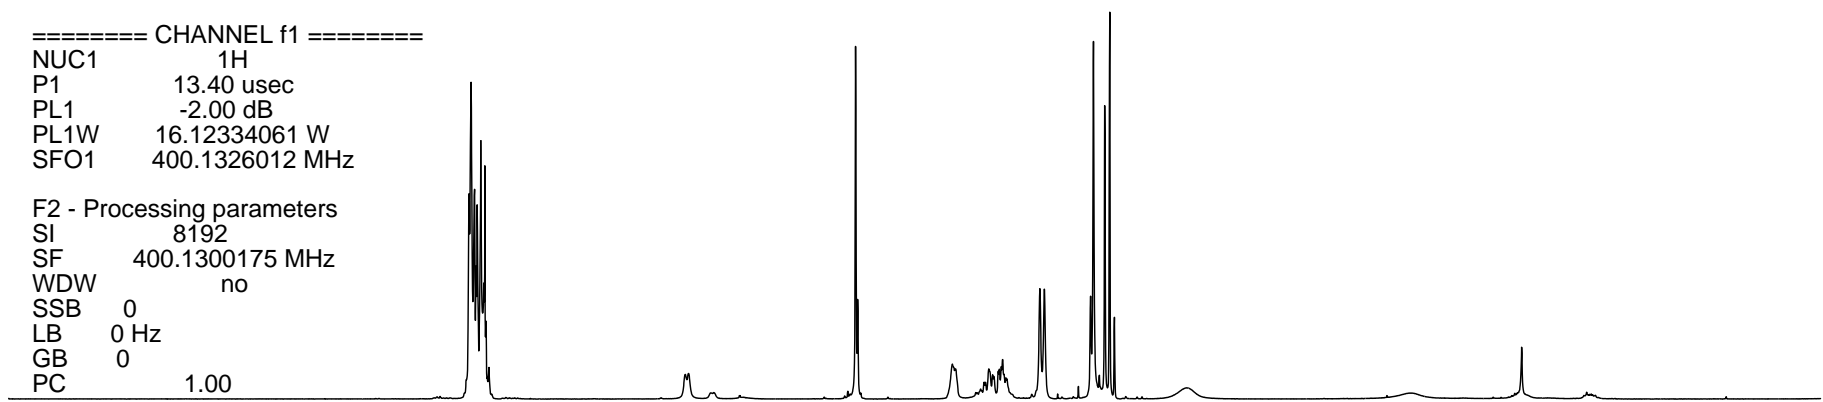

9.5 9.0 8.5 8.0 7.5 7.0 6.5 6.0 5.5 5.0 4.5 4.0 3.5 3.0 2.5 2.0 1.5 1.0 0.5 0.0 ppm

15.20  
1.00  
0.26  
2.27  
0.67  
1.35  
3.22  
3.12  
4.06  
4.33  
1.26

Current Data Parameters  
NAME GPM\_169-all  
EXPNO 3  
PROCNO 1

F2 - Acquisition Parameters  
Date\_ 20140824  
Time 19.39  
INSTRUM spect  
PROBHD 5 mm PABBO BB-  
PULPROG zgpg30  
TD 32768  
SOLVENT CDCl3  
NS 6000  
DS 0  
SWH 23148.148 Hz

FIDRES 0.706425 Hz  
AQ 0.7078388 sec  
RG 2050  
DW 21.600 usec  
DE 8.50 usec  
TE 300.0 K  
D1 2.00000000 sec  
D11 0.03000000 sec  
TD0 1

==== CHANNEL f1 =====  
NUC1 13C  
P1 9.60 usec  
PL1 -2.00 dB  
PL1W 55.33689499 W  
SFO1 100.6238359 MHz

==== CHANNEL f2 =====  
CPDPRG2 waltz16  
NUC2 1H  
PCPD2 90.00 usec  
PL2 -2.00 dB  
PL12 14.20 dB  
PL13 17.20 dB  
PL2W 16.12334061 W  
PL12W 0.38677201 W  
PL13W 0.19384515 W  
SFO2 400.1326011 MHz

F2 - Processing parameters  
SI 16384  
SF 100.6127503 MHz  
WDW EM  
SSB 0  
LB 3.00 Hz  
GB 0  
PC 1.00

156.16  
139.41  
139.36  
136.41  
128.84  
128.68  
128.34  
128.28  
127.71  
127.45  
77.54  
77.23  
76.91  
67.29  
66.29  
66.25  
54.81  
54.75  
53.60  
53.54  
53.45  
52.90  
45.47

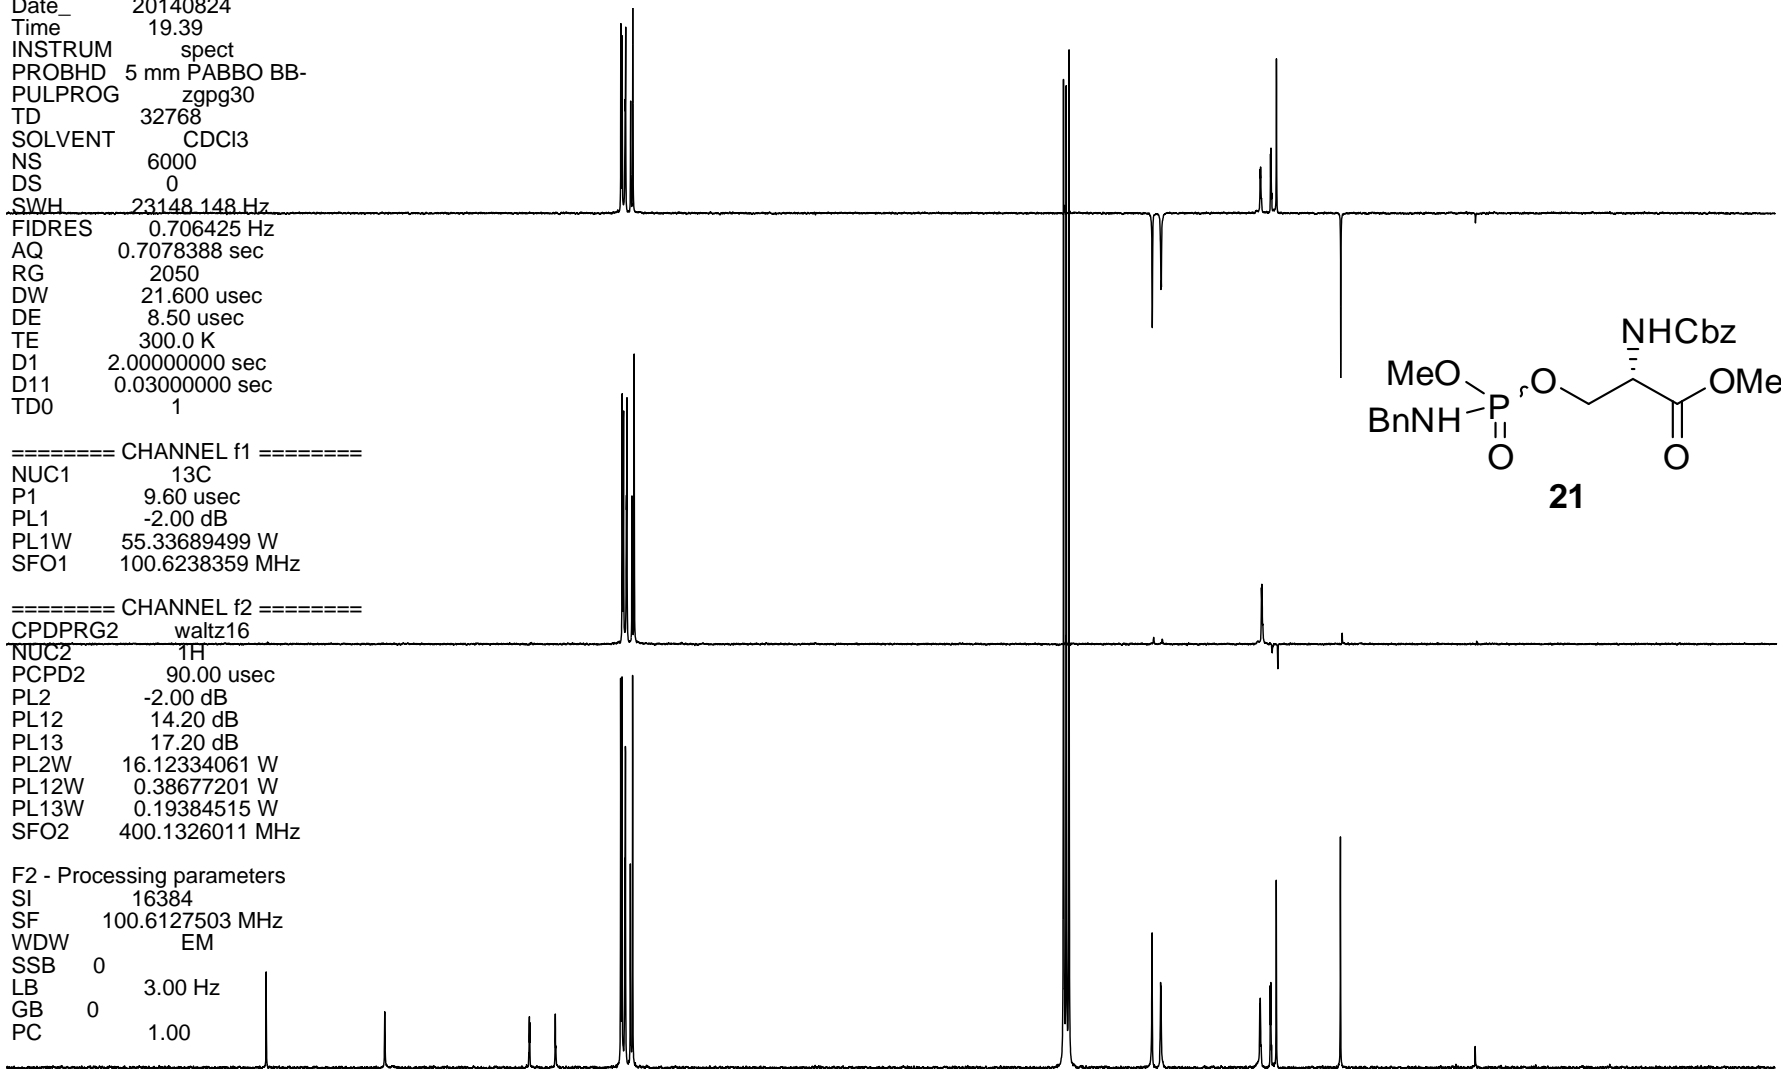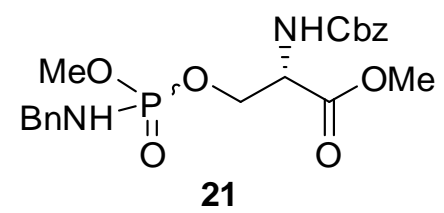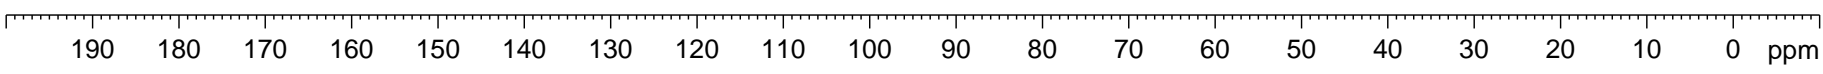

Current Data Parameters  
NAME GPM\_169-all  
EXPNO 10  
PROCNO 1

F2 - Acquisition Parameters  
Date\_ 20140825  
Time 13.22  
INSTRUM spect  
PROBHD 5 mm PABBO BB-  
PULPROG zgpg30  
TD 65536  
SOLVENT CDCl3  
NS 17  
DS 0  
SWH 104166.664 Hz  
FIDRES 1.589457 Hz  
AQ 0.3146228 sec  
RG 2050  
DW 4.800 usec  
DE 6.50 usec  
TE 300.0 K  
D1 2.00000000 sec  
D11 0.03000000 sec  
TD0 1

===== CHANNEL f1 =====  
NUC1 31P  
P1 13.50 usec  
PL1 2.00 dB  
PL1W 16.00742149 W  
SFO1 161.9755930 MHz

===== CHANNEL f2 =====  
CPDPRG2 waltz16  
NUC2 1H  
PCPD2 90.00 usec  
PL2 -2.00 dB  
PL12 14.20 dB  
PL13 17.20 dB  
PL2W 16.12334061 W  
PL12W 0.38677201 W  
PL13W 0.19384515 W  
SFO2 400.1320007 MHz

F2 - Processing parameters  
SI 32768  
SF 161.9755127 MHz  
WDW EM  
SSB 0  
LB 1.00 Hz  
GB 0  
PC 1.00

10.8580  
10.6352

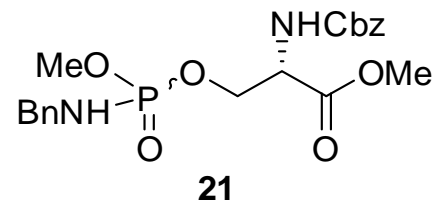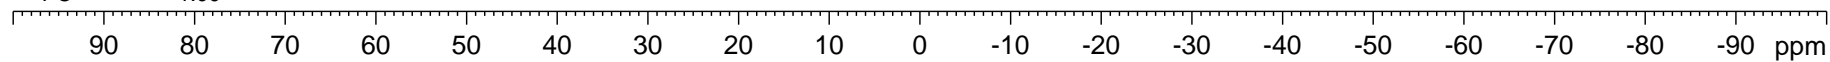

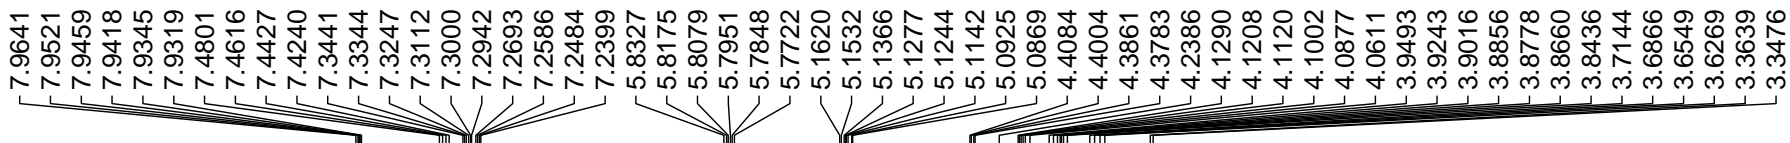

Current Data Parameters

NAME GPM-177-all  
EXPNO 1  
PROCNO 1

F2 - Acquisition Parameters

Date\_ 20140907  
Time 23.46  
INSTRUM spect  
PROBHD 5 mm PABBO BB-  
PULPROG zg30  
TD 16384  
SOLVENT CDCl3  
NS 16  
DS 0  
SWH 5597.015 Hz  
FIDRES 0.341615 Hz  
AQ 1.4636873 sec  
RG 71.8  
DW 89.333 usec  
DE 6.50 usec  
TE 300.0 K  
D1 2.00000000 sec  
TD0 1

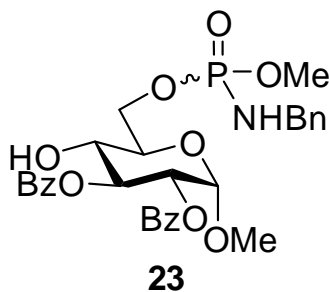

==== CHANNEL f1 =====

NUC1 1H  
P1 13.40 usec  
PL1 -2.00 dB  
PL1W 16.12334061 W  
SFO1 400.1326012 MHz

F2 - Processing parameters

SI 8192  
SF 400.1300175 MHz  
WDW no  
SSB 0  
LB 0 Hz  
GB 0  
PC 1.00

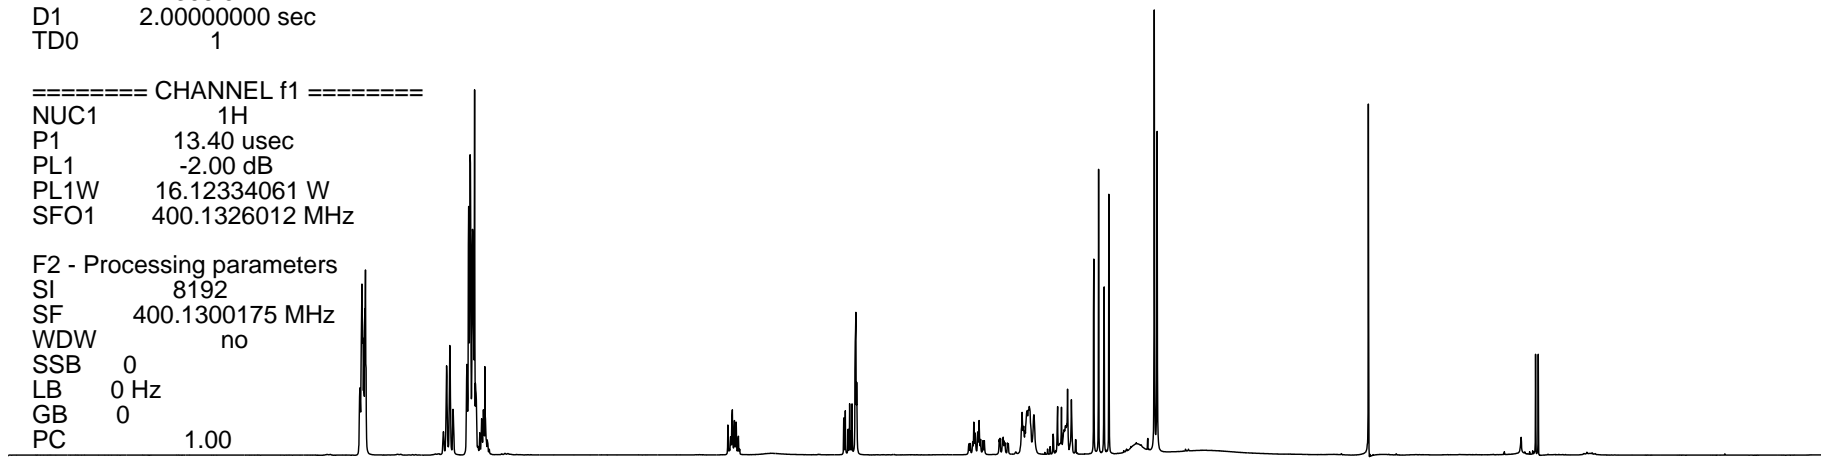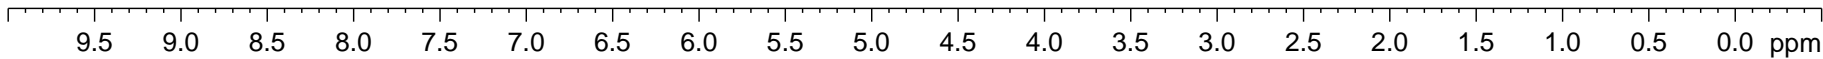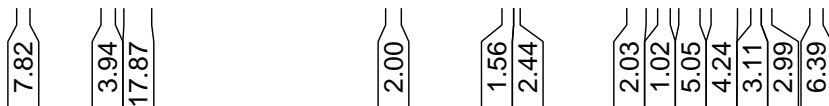

Current Data Parameters  
NAME GPM-177-all  
EXPNO 3  
PROCNO 1

F2 - Acquisition Parameters

Date\_ 20140908  
Time 0.01  
INSTRUM spect  
PROBHD 5 mm PABBO BB-  
PULPROG zgpg30  
TD 32768  
SOLVENT CDCl3  
NS 6000  
DS 0  
SWH 23148.148 Hz  
FIDRES 0.706425 Hz  
AQ 0.7078388 sec  
RG 2050  
DW 21.600 usec  
DE 8.50 usec  
TE 300.0 K  
D1 2.00000000 sec  
D11 0.03000000 sec  
TD0 1

==== CHANNEL f1 =====

NUC1 13C  
P1 9.60 usec  
PL1 -2.00 dB  
PL1W 55.33689499 W  
SFO1 100.6238359 MHz

==== CHANNEL f2 =====

CPDPRG2 waltz16  
NUC2 1H  
PCPD2 90.00 usec  
PL2 -2.00 dB  
PL12 14.20 dB  
PL13 17.20 dB  
PL2W 16.12334061 W  
PL12W 0.38677201 W  
PL13W 0.19384515 W  
SFO2 400.1326011 MHz

F2 - Processing parameters

SI 16384  
SF 100.6127548 MHz  
WDW EM  
SSB 0  
LB 3.00 Hz  
GB 0  
PC 1.00

166.72  
166.17  
139.60  
139.54  
139.48  
139.42  
133.41  
133.17  
130.03  
129.93  
129.36  
128.79  
128.51  
128.40  
127.64  
127.54  
127.52  
97.44  
97.38  
73.06  
72.90  
72.13  
70.93  
70.88  
68.57  
68.38  
65.37  
65.32  
64.79  
64.75  
55.57  
53.63  
53.58  
53.54  
53.49  
45.48  
45.41

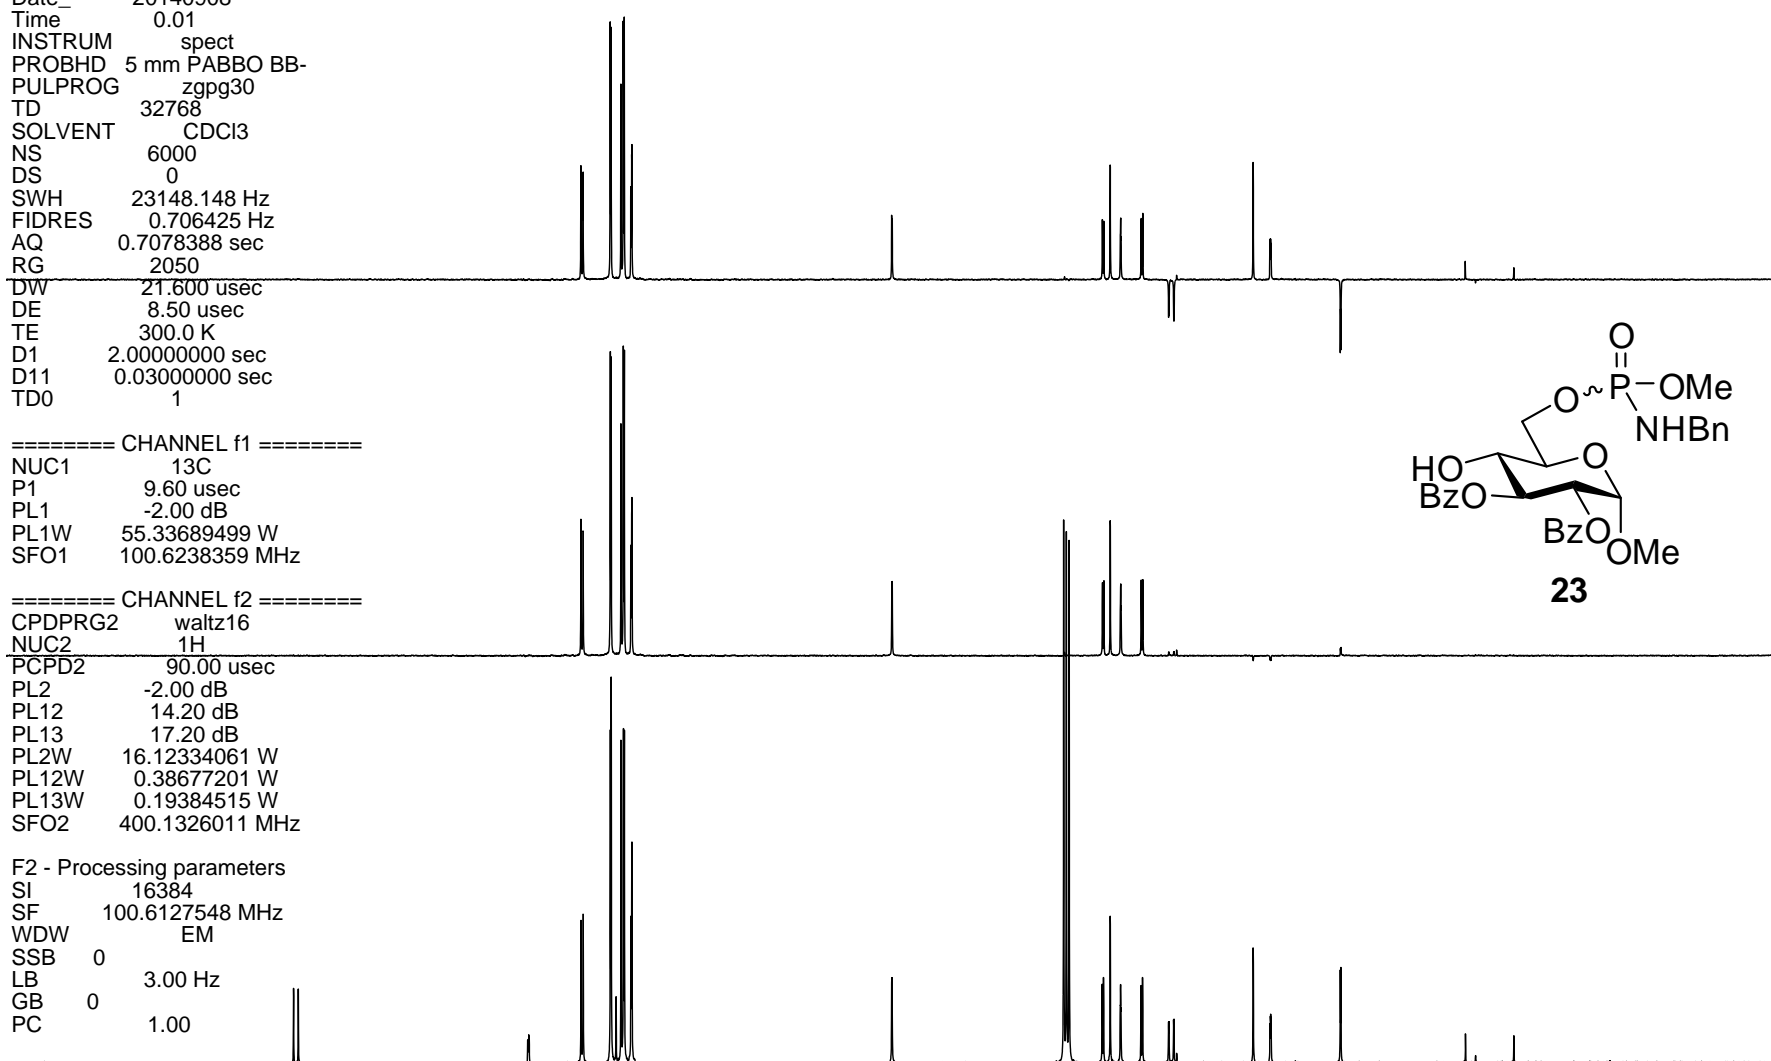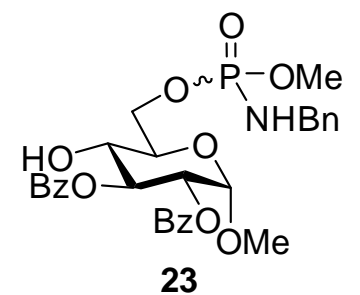

Current Data Parameters

NAME GPM-177-all  
EXPNO 2  
PROCNO 1

F2 - Acquisition Parameters

Date\_ 20140907  
Time 23.48  
INSTRUM spect  
PROBHD 5 mm PABBO BB-  
PULPROG zgpg30  
TD 65536  
SOLVENT CDCl3  
NS 28  
DS 0  
SWH 104166.664 Hz  
FIDRES 1.589457 Hz  
AQ 0.3146228 sec  
RG 2050  
DW 4.800 usec  
DE 6.50 usec  
TE 300.0 K  
D1 2.00000000 sec  
D11 0.03000000 sec  
TD0 1

===== CHANNEL f1 =====

NUC1 31P  
P1 13.50 usec  
PL1 2.00 dB  
PL1W 16.00742149 W  
SFO1 161.9755930 MHz

===== CHANNEL f2 =====

CPDPRG2 waltz16  
NUC2 1H  
PCPD2 90.00 usec  
PL2 -2.00 dB  
PL12 14.20 dB  
PL13 17.20 dB  
PL2W 16.12334061 W  
PL12W 0.38677201 W  
PL13W 0.19384515 W  
SFO2 400.1320007 MHz

F2 - Processing parameters

SI 32768  
SF 161.9755127 MHz  
WDW EM  
SSB 0  
LB 1.00 Hz  
GB 0  
PC 1.00

12.0855  
12.0265

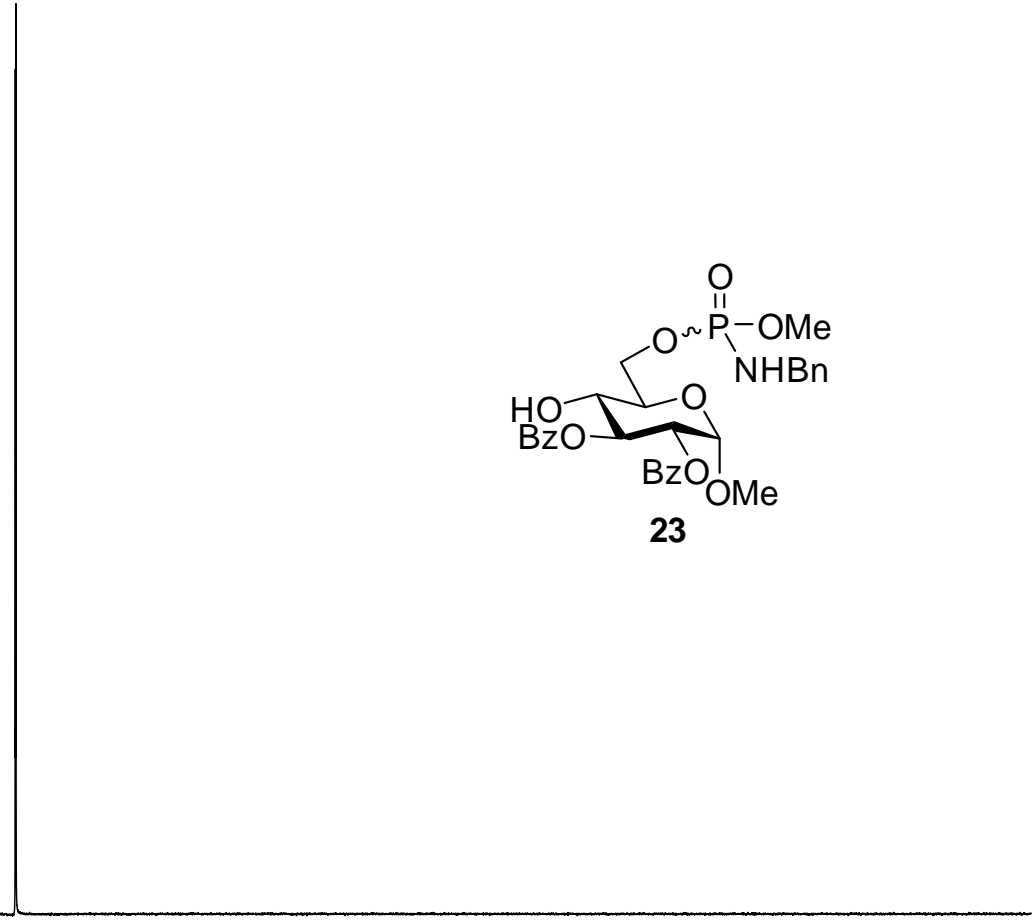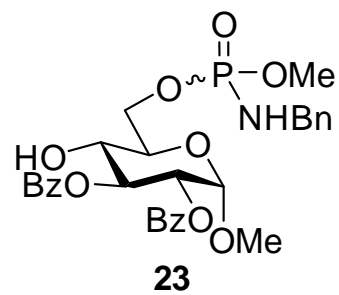

90 80 70 60 50 40 30 20 10 0 -10 -20 -30 -40 -50 -60 -70 -80 -90 ppm

7.9998  
7.9894  
7.9845  
7.9801  
7.9763  
7.9564  
7.9540  
7.9365  
7.9335  
7.4872  
7.4843  
7.4691  
7.4653  
7.4499  
7.4470  
7.3493  
7.3298  
7.3194  
7.3095  
7.3028  
7.2923  
7.2749  
7.2548  
7.2500  
7.2401  
5.6734  
5.6656  
5.6540  
5.6469  
5.6396  
5.6369  
5.6303  
5.6037  
5.1365  
5.1282  
4.3714  
4.3322  
4.2964  
4.2714  
4.2499  
4.1508  
4.1329  
4.1175  
4.1124  
4.0954  
4.0845  
4.0791  
4.0698  
4.0588  
4.0537  
4.0418  
3.8528  
3.8410  
3.6930  
3.6808  
3.6741  
3.6458  
3.3760

Current Data Parameters

NAME vd-728 all  
EXPNO 1  
PROCNO 1

F2 - Acquisition Parameters

Date\_ 20140911  
Time 21.36  
INSTRUM spect  
PROBHD 5 mm PABBO BB-  
PULPROG zg30  
TD 16384  
SOLVENT CDCl3  
NS 64  
DS 0  
SWH 5597.015 Hz  
FIDRES 0.341615 Hz  
AQ 1.4636873 sec  
RG 114  
DW 89.333 usec  
DE 6.50 usec  
TE 300.0 K  
D1 2.00000000 sec  
TD0 1

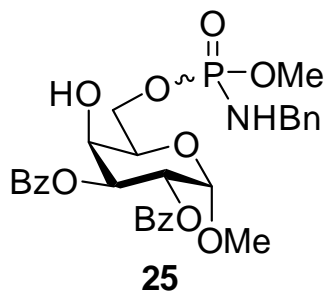

==== CHANNEL f1 =====

NUC1 1H  
P1 13.40 usec  
PL1 -2.00 dB  
PL1W 16.12334061 W  
SFO1 400.1326012 MHz

F2 - Processing parameters

SI 8192  
SF 400.1300175 MHz  
WDW no  
SSB 0  
LB 0 Hz  
GB 0  
PC 1.00

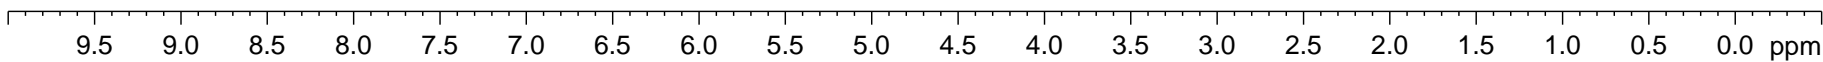

7.89  
4.03  
22.03  
4.07  
2.00  
2.11  
2.25  
1.98  
6.40  
1.05  
0.97  
6.53  
5.87  
2.01



Current Data Parameters  
NAME vd-728 all  
EXPNO 2  
PROCNO 1

F2 - Acquisition Parameters

Date\_ 20140911  
Time 21.41  
INSTRUM spect  
PROBHD 5 mm PABBO BB-  
PULPROG zgpg30  
TD 32768  
SOLVENT CDCl3  
NS 6000  
DS 0  
SWH 23148.148 Hz  
FIDRES 0.706425 Hz  
AQ 0.7078388 sec  
RG 2050  
Dw 21.600 usec  
DE 8.50 usec  
TE 300.0 K  
D1 2.00000000 sec  
D11 0.03000000 sec  
TD0 1

==== CHANNEL f1 =====

NUC1 13C  
P1 9.80 usec  
PL1 -2.00 dB  
PL1W 55.33689499 W  
SFO1 100.6238359 MHz

==== CHANNEL f2 =====

CPDPRG2 waltz16  
NUC2 1H  
PCPD2 90.00 usec  
PL2 -2.00 dB  
PL12 13.70 dB  
PL13 16.70 dB  
PL2W 16.12334061 W  
PL12W 0.43396533 W  
PL13W 0.21749784 W  
SFO2 400.1326011 MHz

F2 - Processing parameters

SI 16384  
SF 100.6127700 MHz  
WDW EM  
SSB 0  
LB 3.00 Hz  
GB 0  
PC 1.00

139.31  
139.25  
139.18  
133.12  
129.81  
129.68  
129.52  
128.65  
128.32  
127.52  
127.33  
97.65  
77.32  
77.20  
77.00  
76.68  
70.53  
70.40  
69.08  
68.54  
68.48  
68.41  
68.34  
67.12  
67.01  
64.19  
64.14  
63.94  
63.90  
61.99  
55.54  
53.37  
53.32  
51.60  
45.33

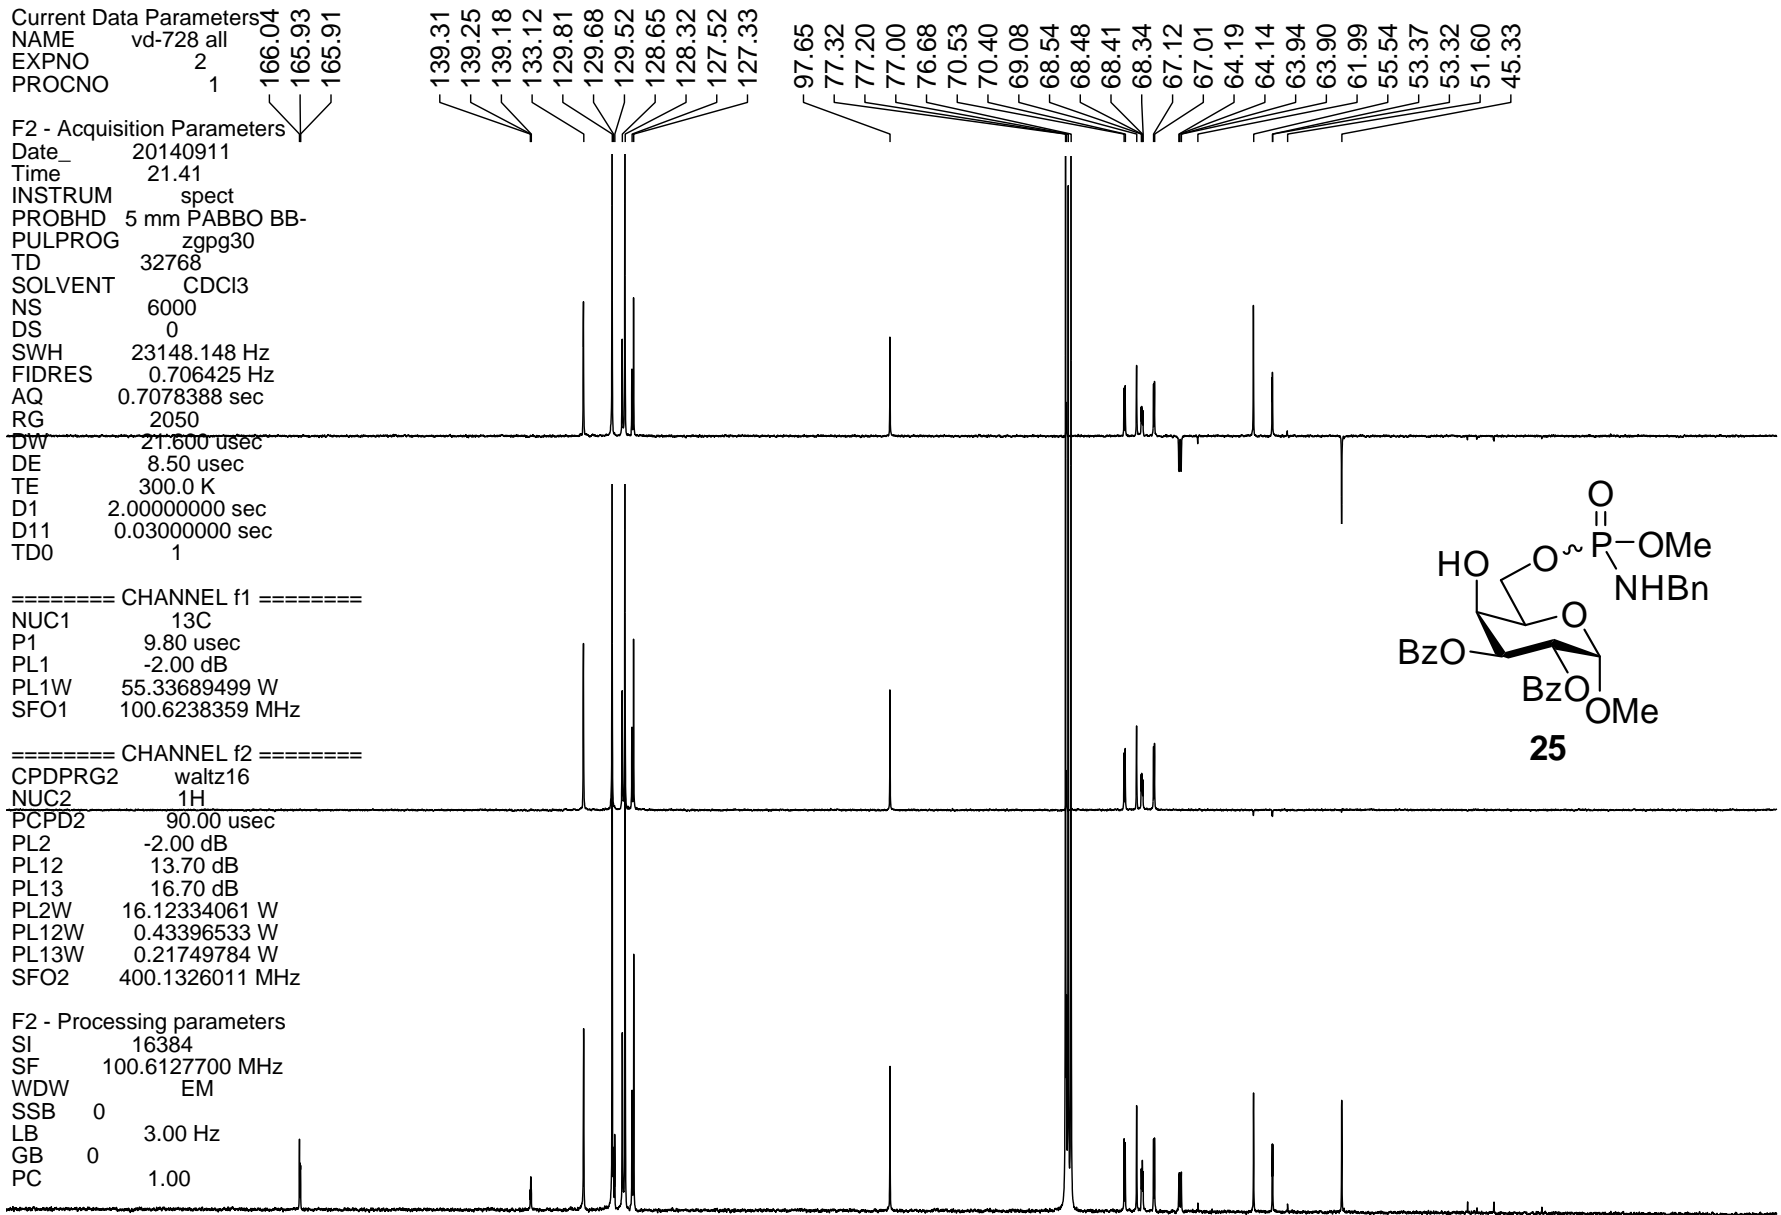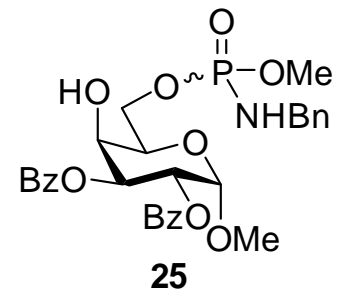

Current Data Parameters

NAME vd-728 P31  
EXPNO 1  
PROCNO 1

F2 - Acquisition Parameters

Date\_ 20140911  
Time 21.20  
INSTRUM spect  
PROBHD 5 mm PABBO BB-  
PULPROG zgpg30  
TD 65536  
SOLVENT CDCl3  
NS 16  
DS 0  
SWH 104166.664 Hz  
FIDRES 1.589457 Hz  
AQ 0.3146228 sec  
RG 2050  
DW 4.800 usec  
DE 6.50 usec  
TE 300.0 K  
D1 2.00000000 sec  
D11 0.03000000 sec  
TD0 1

===== CHANNEL f1 =====

NUC1 31P  
P1 13.50 usec  
PL1 2.00 dB  
PL1W 16.00742149 W  
SFO1 161.9755930 MHz

===== CHANNEL f2 =====

CPDPRG2 waltz16  
NUC2 1H  
PCPD2 90.00 usec  
PL2 -2.00 dB  
PL12 13.70 dB  
PL13 16.70 dB  
PL2W 16.12334061 W  
PL12W 0.43396533 W  
PL13W 0.21749784 W  
SFO2 400.1320007 MHz

F2 - Processing parameters

SI 32768  
SF 161.9755127 MHz  
WDW EM  
SSB 0  
GB 0  
PC 1.00

11.6746  
11.3757

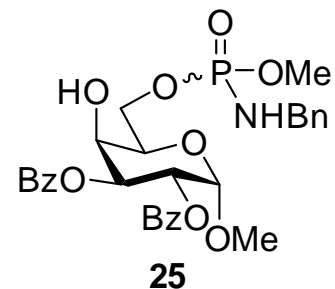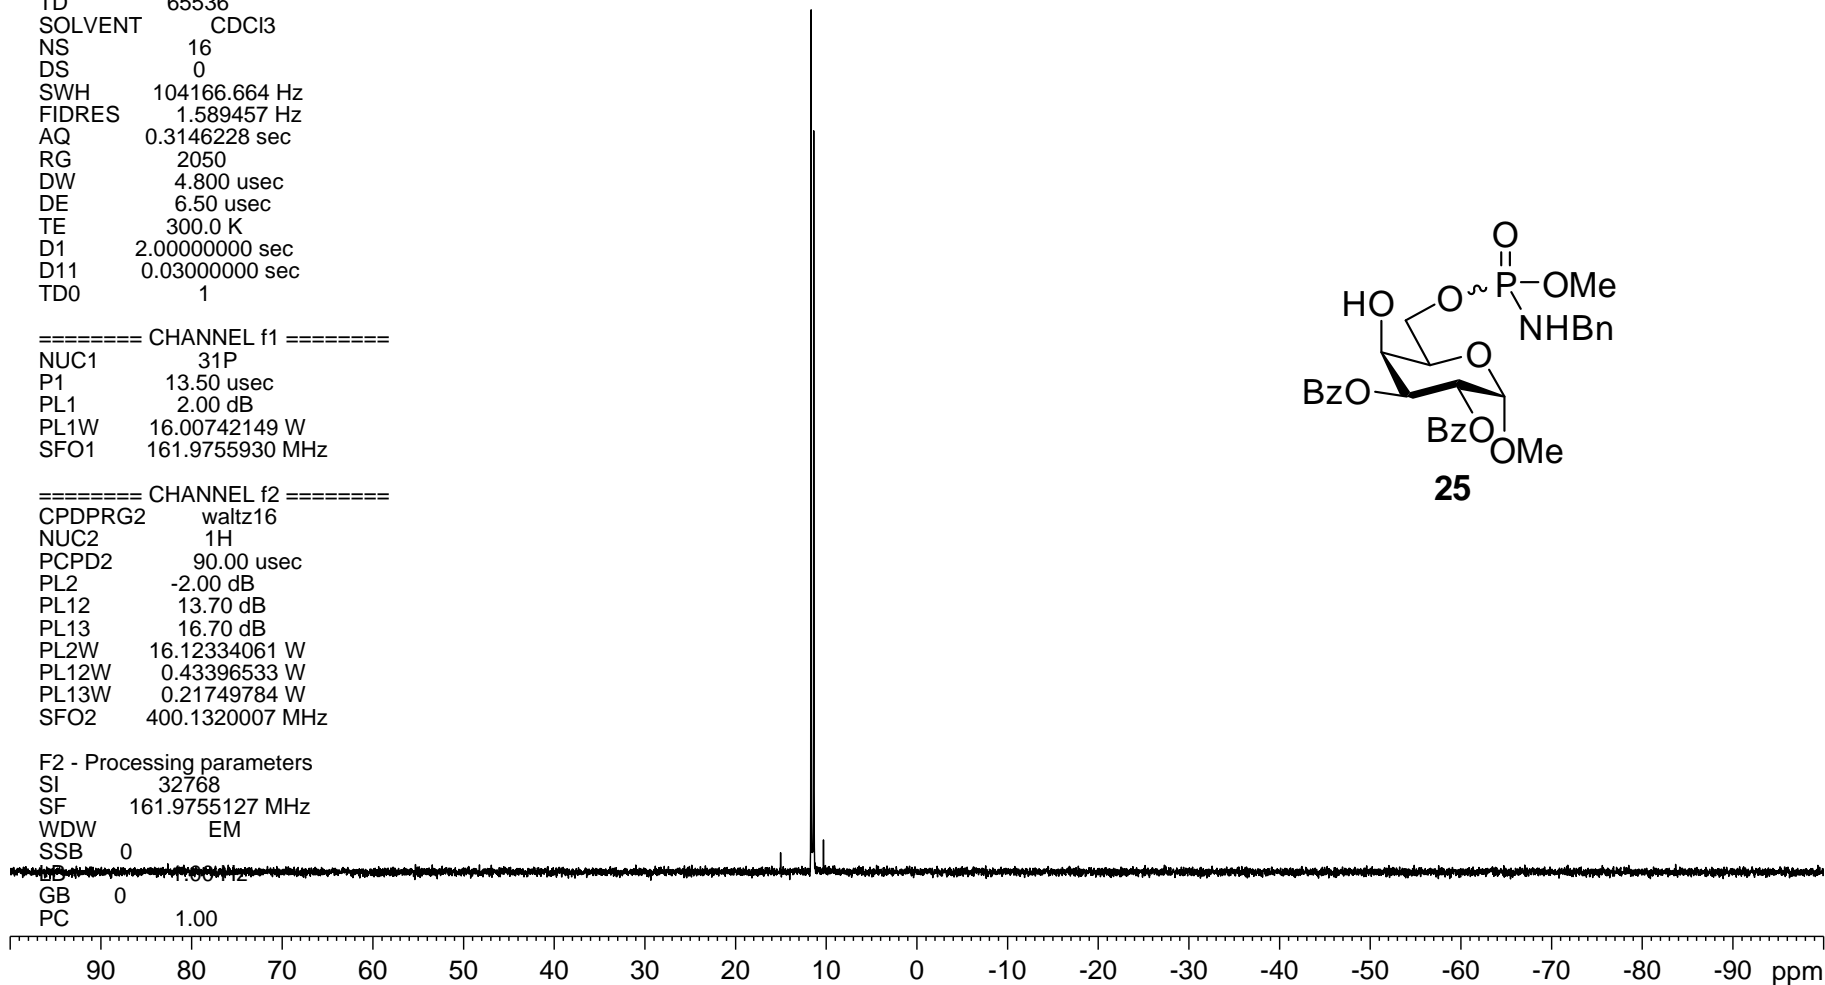

7.4820  
7.4724  
7.4631  
7.4585  
7.3489  
7.3404  
7.3365  
7.3288  
7.3237  
7.3145  
7.3037  
7.2839  
7.2724  
7.2625  
7.2525  
7.2404  
7.2315  
5.5064  
4.9196  
4.9104  
4.2862  
4.2743  
4.2689  
4.2605  
4.2482  
4.2370  
4.2245  
4.2148  
4.1597  
4.1472  
4.1371  
4.1304  
4.1224  
4.1054  
4.0978  
4.0899  
4.0804  
3.8622  
3.8505  
3.8371  
3.8255  
3.8128  
3.8011  
3.7382  
3.7127  
3.6981  
3.6868  
3.6698  
3.6429  
3.5043  
3.4813  
3.4579  
3.4189  
3.3548  
3.3402  
3.3281  
3.3207  
3.3111

NAME vd-716-1 All  
EXPNO 1  
PROCNO 1  
Date\_ 20140809  
Time 21.44  
INSTRUM spect  
PROBHD 5 mm PABBO BB-  
PULPROG zg30  
TD 16384  
SOLVENT CDCl3  
NS 64  
DS 0  
SWH 5597.015 Hz  
FIDRES 0.341615 Hz  
AQ 1.4636873 sec  
RG 144  
DW 89.333 usec  
DE 6.50 usec  
TE 300.0 K  
D1 2.00000000 sec  
TD0 1

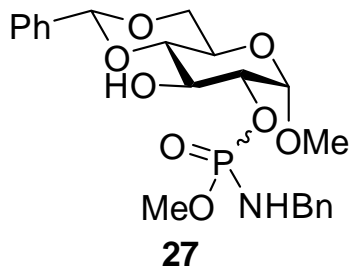

==== CHANNEL f1 =====  
NUC1 1H  
P1 13.40 usec  
PL1 -2.00 dB  
PL1W 16.12334061 W  
SFO1 400.1326012 MHz  
SI 8192  
SF 400.1300175 MHz  
WDW no  
SSB 0  
LB 0.00 Hz  
GB 0  
PC 1.00

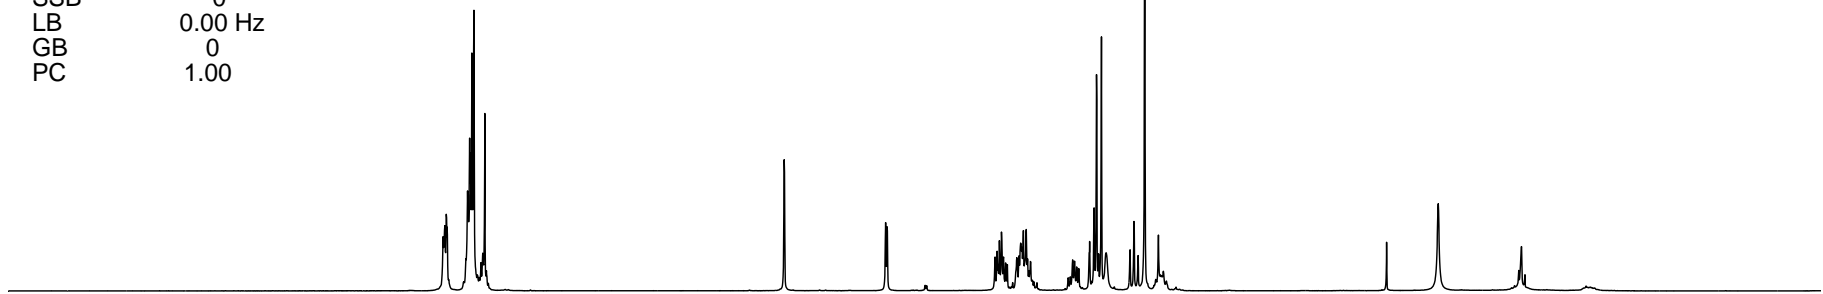

9.5 9.0 8.5 8.0 7.5 7.0 6.5 6.0 5.5 5.0 4.5 4.0 3.5 3.0 2.5 2.0 1.5 1.0 0.5 0.0 ppm

2.00  
8.81  
1.00  
0.94  
2.13  
3.44  
1.15  
1.10  
3.09  
0.94  
1.15  
2.87  
1.24



Current Data Parameters

NAME vd-716-1 P31  
EXPNO 1  
PROCNO 1

F2 - Acquisition Parameters

Date\_ 20140809  
Time 21.24  
INSTRUM spect  
PROBHD 5 mm PABBO BB-  
PULPROG zgpg30  
TD 65536  
SOLVENT CDCl3  
NS 24  
DS 0  
SWH 104166.664 Hz  
FIDRES 1.589457 Hz  
AQ 0.3146228 sec  
RG 2050  
DW 4.800 usec  
DE 6.50 usec  
TE 300.0 K  
D1 2.00000000 sec  
D11 0.03000000 sec  
TD0 1

===== CHANNEL f1 =====

NUC1 31P  
P1 13.50 usec  
PL1 2.00 dB  
PL1W 16.00742149 W  
SFO1 161.9755930 MHz

===== CHANNEL f2 =====

CPDPRG2 waltz16  
NUC2 1H  
PCPD2 90.00 usec  
PL2 -2.00 dB  
PL12 13.70 dB  
PL13 16.70 dB  
PL2W 16.12334061 W  
PL12W 0.43396533 W  
PL13W 0.21749784 W  
SFO2 400.1320007 MHz

F2 - Processing parameters

SI 32768  
SF 161.9755127 MHz  
WDW EM  
SSB 0  
GB 0  
PC 1.00

11.5404  
11.0651

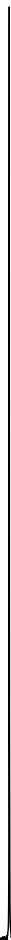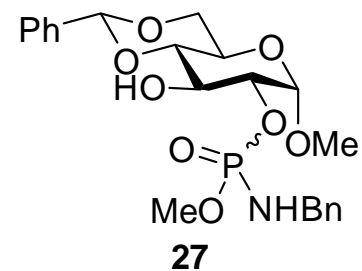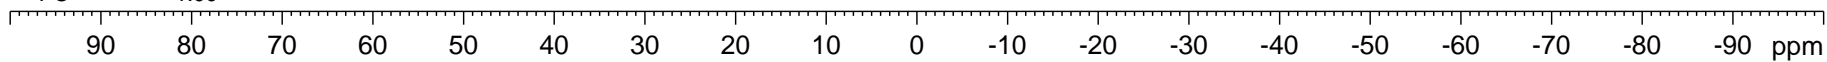

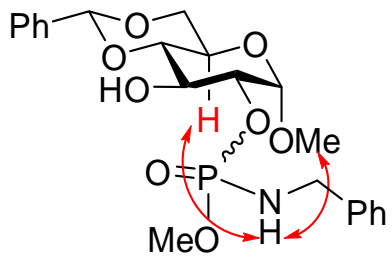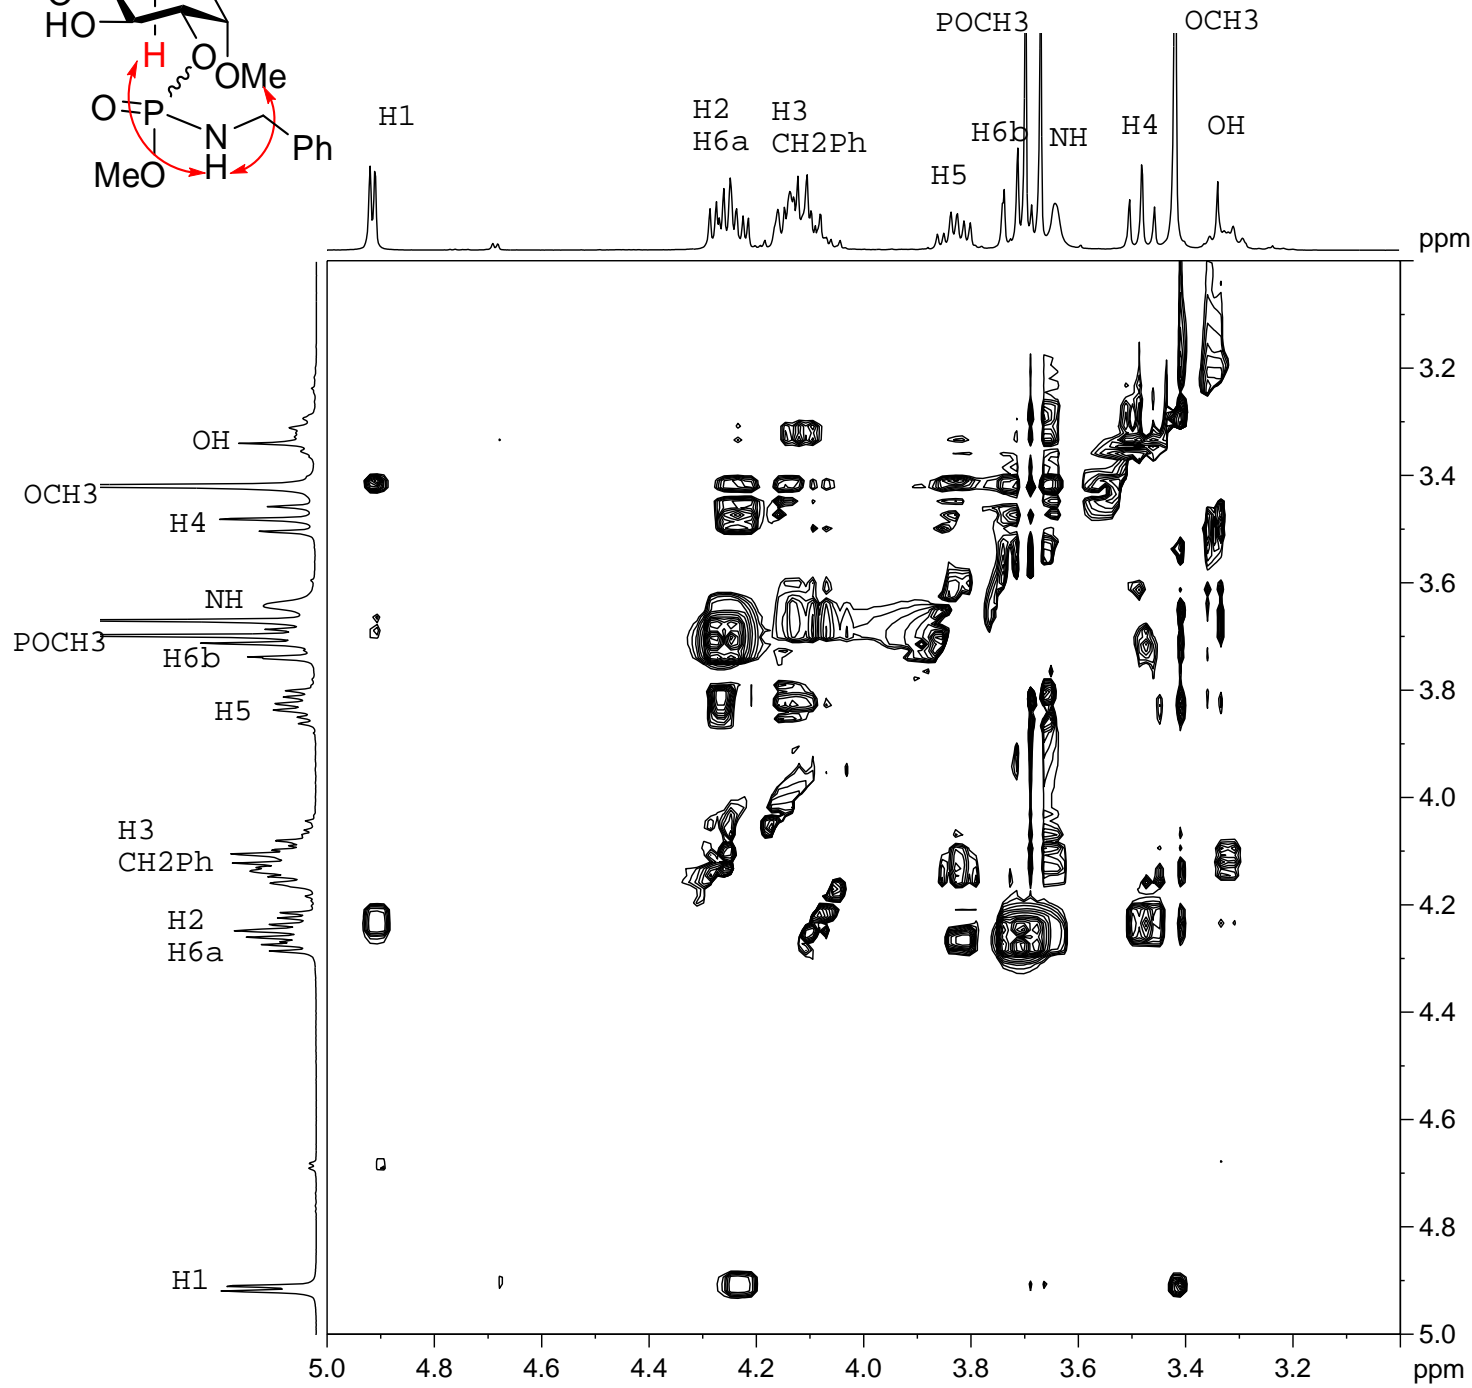

Current Data Parameters

NAME vd-716-1 All  
 EXPNO 7  
 PROCNO 1

F2 - Acquisition Parameters

Date\_ 20140810  
 Time 8.49  
 INSTRUM spect  
 PROBHD 5 mm PABBO BB-  
 PULPROG noesygpshpp  
 TD 2048  
 SOLVENT CDCl3  
 NS 4  
 DS 16  
 SWH 5197.505 Hz  
 FIDRES 2.537844 Hz  
 AQ 0.1970676 sec  
 RG 256  
 DW 96.200 usec  
 DE 6.50 usec  
 TE 300.0 K  
 D0 0.00007914 sec  
 D1 2.00000000 sec  
 D8 0.40000001 sec  
 D11 0.03000000 sec  
 D12 0.00002000 sec  
 D16 0.00020000 sec  
 IN0 0.00019240 sec

===== CHANNEL f1 =====

NUC1 1H  
 P1 13.40 usec  
 P2 26.80 usec  
 P17 2500.00 usec  
 PL1 -2.00 dB  
 PL10 3.30 dB  
 PL1W 16.12334061 W  
 PL10W 4.75833511 W  
 SFO1 400.1318006 MHz

===== GRADIENT CHANNEL =

GPAM1 SMSQ10.100  
 GPAM2 SMSQ10.100  
 GPZ1 40.00 %

7.4591  
7.4392  
7.4279  
7.4232  
7.3994  
7.3794  
7.3619  
7.3342  
7.3250  
7.3188  
7.3090  
7.2932  
7.2749  
7.2599  
7.2367  
7.2313  
7.2151  
7.1965  
7.1894  
7.1704  
7.1499  
7.1333  
7.1146  
7.0978  
5.5286  
4.6857  
4.6613  
4.4454  
4.4236  
4.4017  
4.3801  
4.2960  
4.2839  
4.2701  
4.2584  
4.2150  
3.9216  
3.8939  
3.7627  
3.7342  
3.7122  
3.7092  
3.6358  
3.6216  
3.6072  
3.5988  
3.5751  
3.5465  
3.5343  
3.5285  
3.5226  
3.5169  
3.5105  
3.4976  
3.4752  
3.4522  
2.3339  
2.3133

Current Data Parameters

NAME GPM-297-all  
EXPNO 1  
PROCNO 1

F2 - Acquisition Parameters

Date\_ 20150407  
Time 21.07  
INSTRUM spect  
PROBHD 5 mm PABBO BB-  
PULPROG zg30  
TD 16384  
SOLVENT MeOD  
NS 40  
DS 0  
SWH 5597.015 Hz  
FIDRES 0.341615 Hz  
AQ 1.4636873 sec  
RG 114  
DW 89.333 usec  
DE 6.50 usec  
TE 300.0 K  
D1 2.00000000 sec  
TD0 1

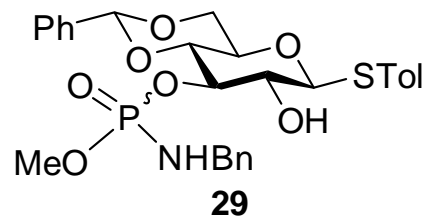

==== CHANNEL f1 =====

NUC1 1H  
P1 13.40 usec  
PL1 -2.00 dB  
PL1W 16.12334061 W  
SFO1 400.1326012 MHz

F2 - Processing parameters

SI 8192  
SF 400.1300077 MHz  
WDW EM  
SSB 0  
LB 0 Hz  
GB 0  
PC 1.00

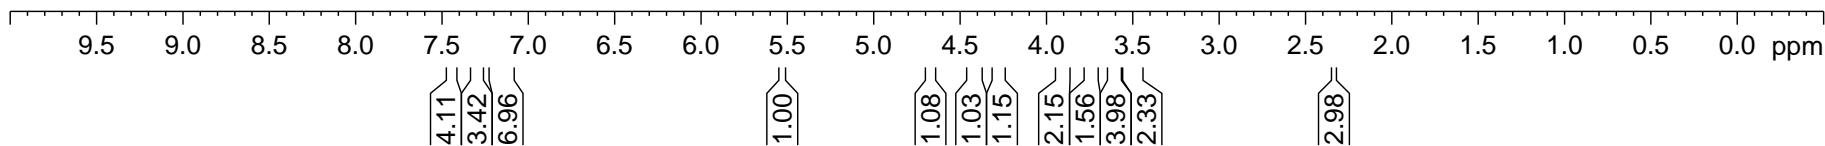

NAME GPM-297-all  
 EXPNO 3  
 PROCNO 1  
 Date\_ 20150407  
 Time 21.18  
 INSTRUM spect  
 PROBHD 5 mm PABBO BB-  
 PULPROG zgpg30  
 TD 32768  
 SOLVENT MeOD  
 NS 6000  
 DS 0  
 SWH 23148.148 Hz  
 FIDRES 0.706425 Hz  
 AQ 0.7078388 sec  
 RG 2050  
 DW 21.600 usec  
 DE 8.50 usec  
 TE 300.0 K  
 D1 2.00000000 sec  
 D11 0.03000000 sec  
 TD0 1

===== CHANNEL f1 =====  
 NUC1 13C  
 P1 9.60 usec  
 PL1 -2.00 dB  
 PL1W 55.33689499 W  
 SFO1 100.6238359 MHz

===== CHANNEL f2 =====  
 CPDPRG2 waltz16  
 NUC2 1H  
 PCPD2 90.00 usec  
 PL2 -2.00 dB  
 PL12 14.20 dB  
 PL13 17.20 dB  
 PL2W 16.12334061 W  
 PL12W 0.38677201 W  
 PL13W 0.19384515 W  
 SFO2 400.1326011 MHz  
 SI 16384  
 SF 100.6126142 MHz  
 WDW EM  
 SSB 0  
 LB 3.00 Hz  
 GB 0  
 PC 1.00

141.38 141.32 139.53 138.73 134.52 130.68 130.11 129.83 129.29 129.18 128.34 127.97 127.57  
 102.97 89.89 81.47 81.41 80.42 80.40 73.19 71.29 69.46 54.26 54.20 49.64 49.43 49.22 49.01 48.79 48.58 48.37 45.76 21.16

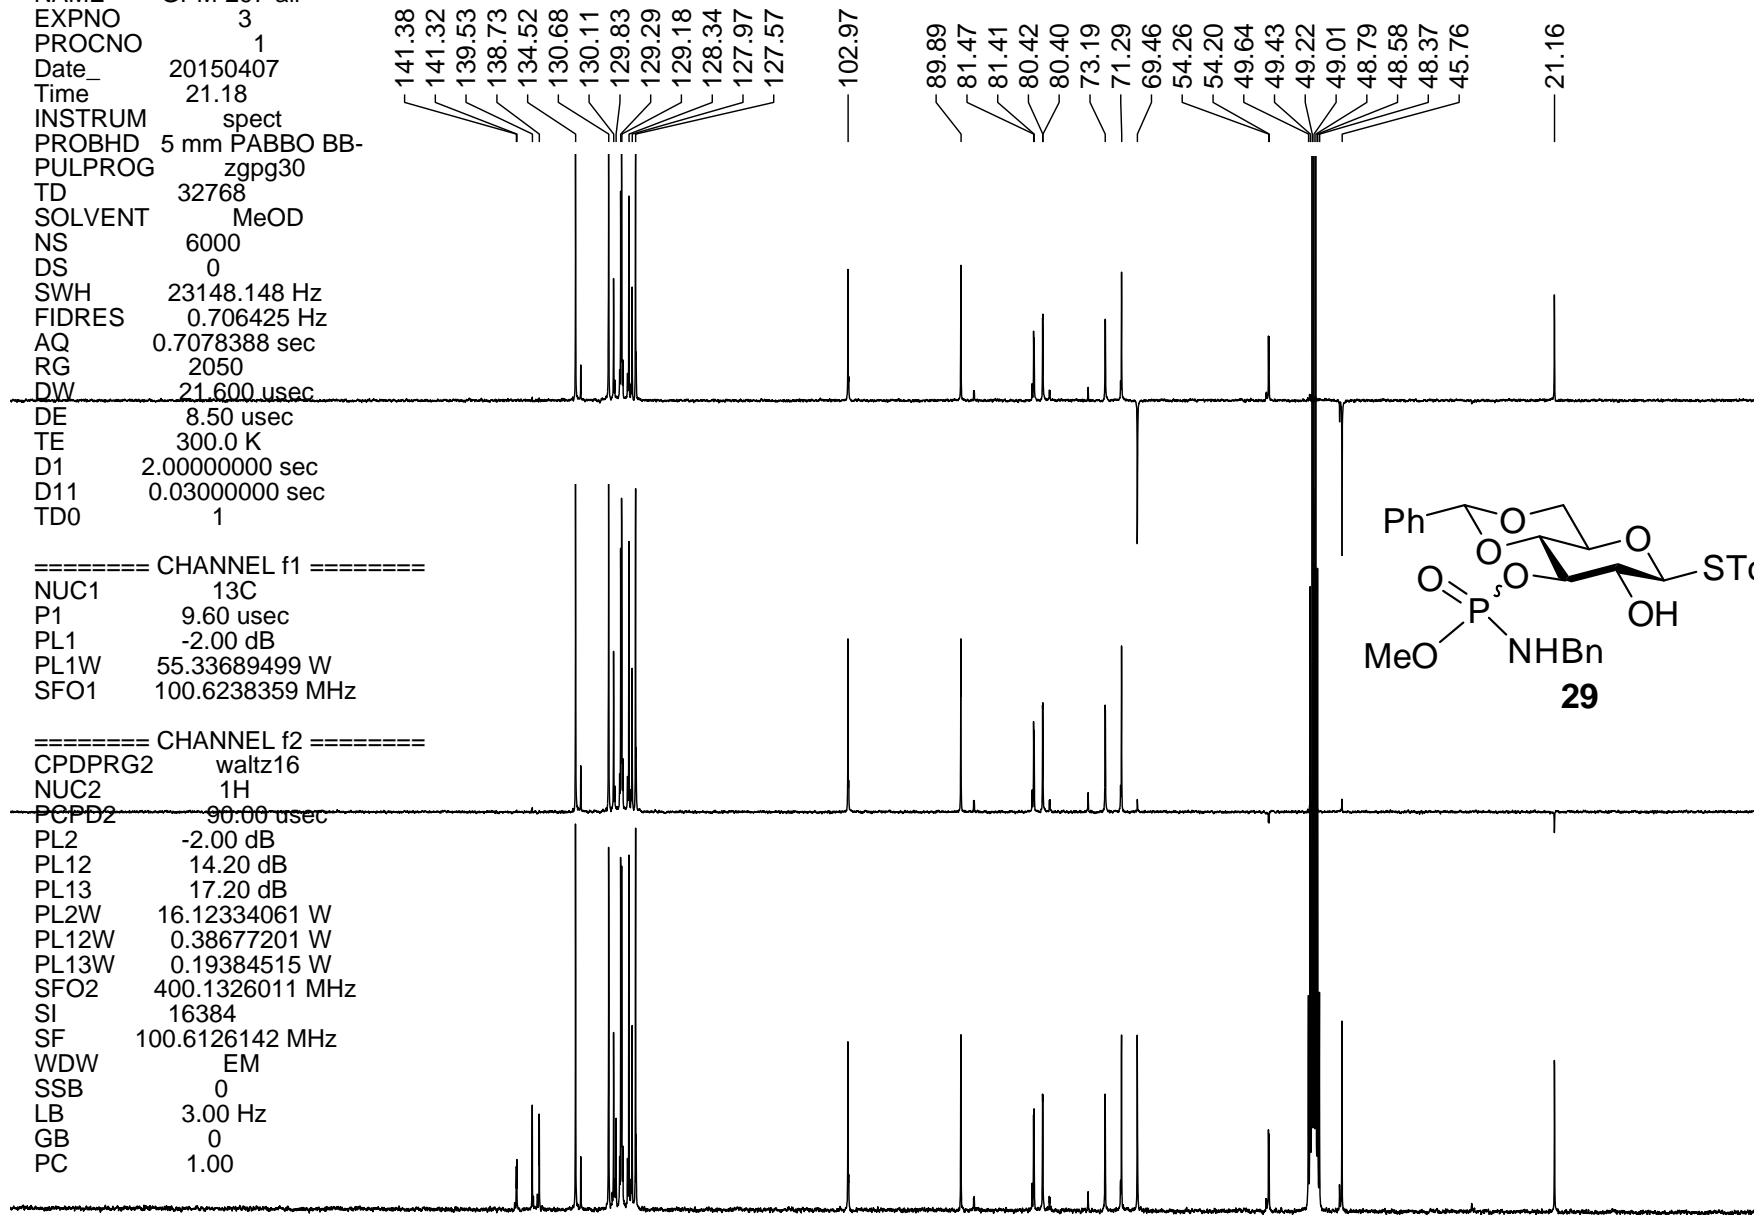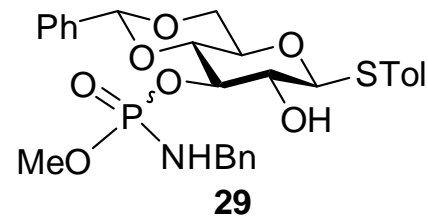

190 180 170 160 150 140 130 120 110 100 90 80 70 60 50 40 30 20 10 0 ppm



NAME GPM-297-all  
 EXPNO 2  
 PROCNO 1  
 Date\_ 20150407  
 Time 21.13  
 INSTRUM spect  
 PROBHD 5 mm PABBO BB-  
 PULPROG zgpg30  
 TD 65536  
 SOLVENT MeOD  
 NS 5  
 DS 0  
 SWH 104166.664 Hz  
 FIDRES 1.589457 Hz  
 AQ 0.3146228 sec  
 RG 2050  
 DW 4.800 usec  
 DE 6.50 usec  
 TE 300.0 K  
 D1 2.00000000 sec  
 D11 0.03000000 sec  
 TD0 1

==== CHANNEL f1 =====

NUC1 31P  
 P1 13.50 usec  
 PL1 2.00 dB  
 PL1W 16.00742149 W  
 SFO1 161.9755930 MHz

==== CHANNEL f2 =====

CPDPRG2 waltz16  
 NUC2 1H  
 PCPD2 90.00 usec  
 PL2 -2.00 dB  
 PL12 14.20 dB  
 PL13 17.20 dB  
 PL2W 16.12334061 W  
 PL12W 0.38677201 W  
 PL13W 0.19384515 W  
 SFO2 400.1320007 MHz  
 SI 32768  
 SF 161.9755127 MHz  
 WDW EM  
 SSB 0  
 LB 1.00 Hz  
 GB 0  
 PC 1.00

11.4366  
10.7755

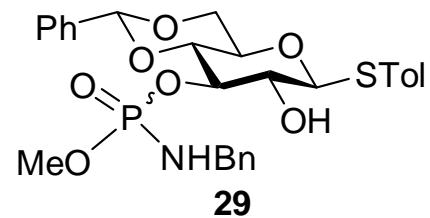

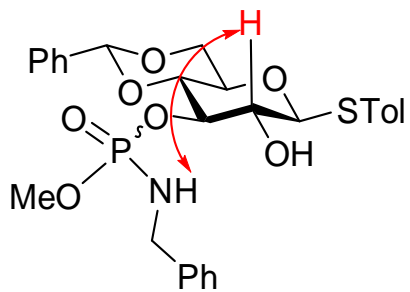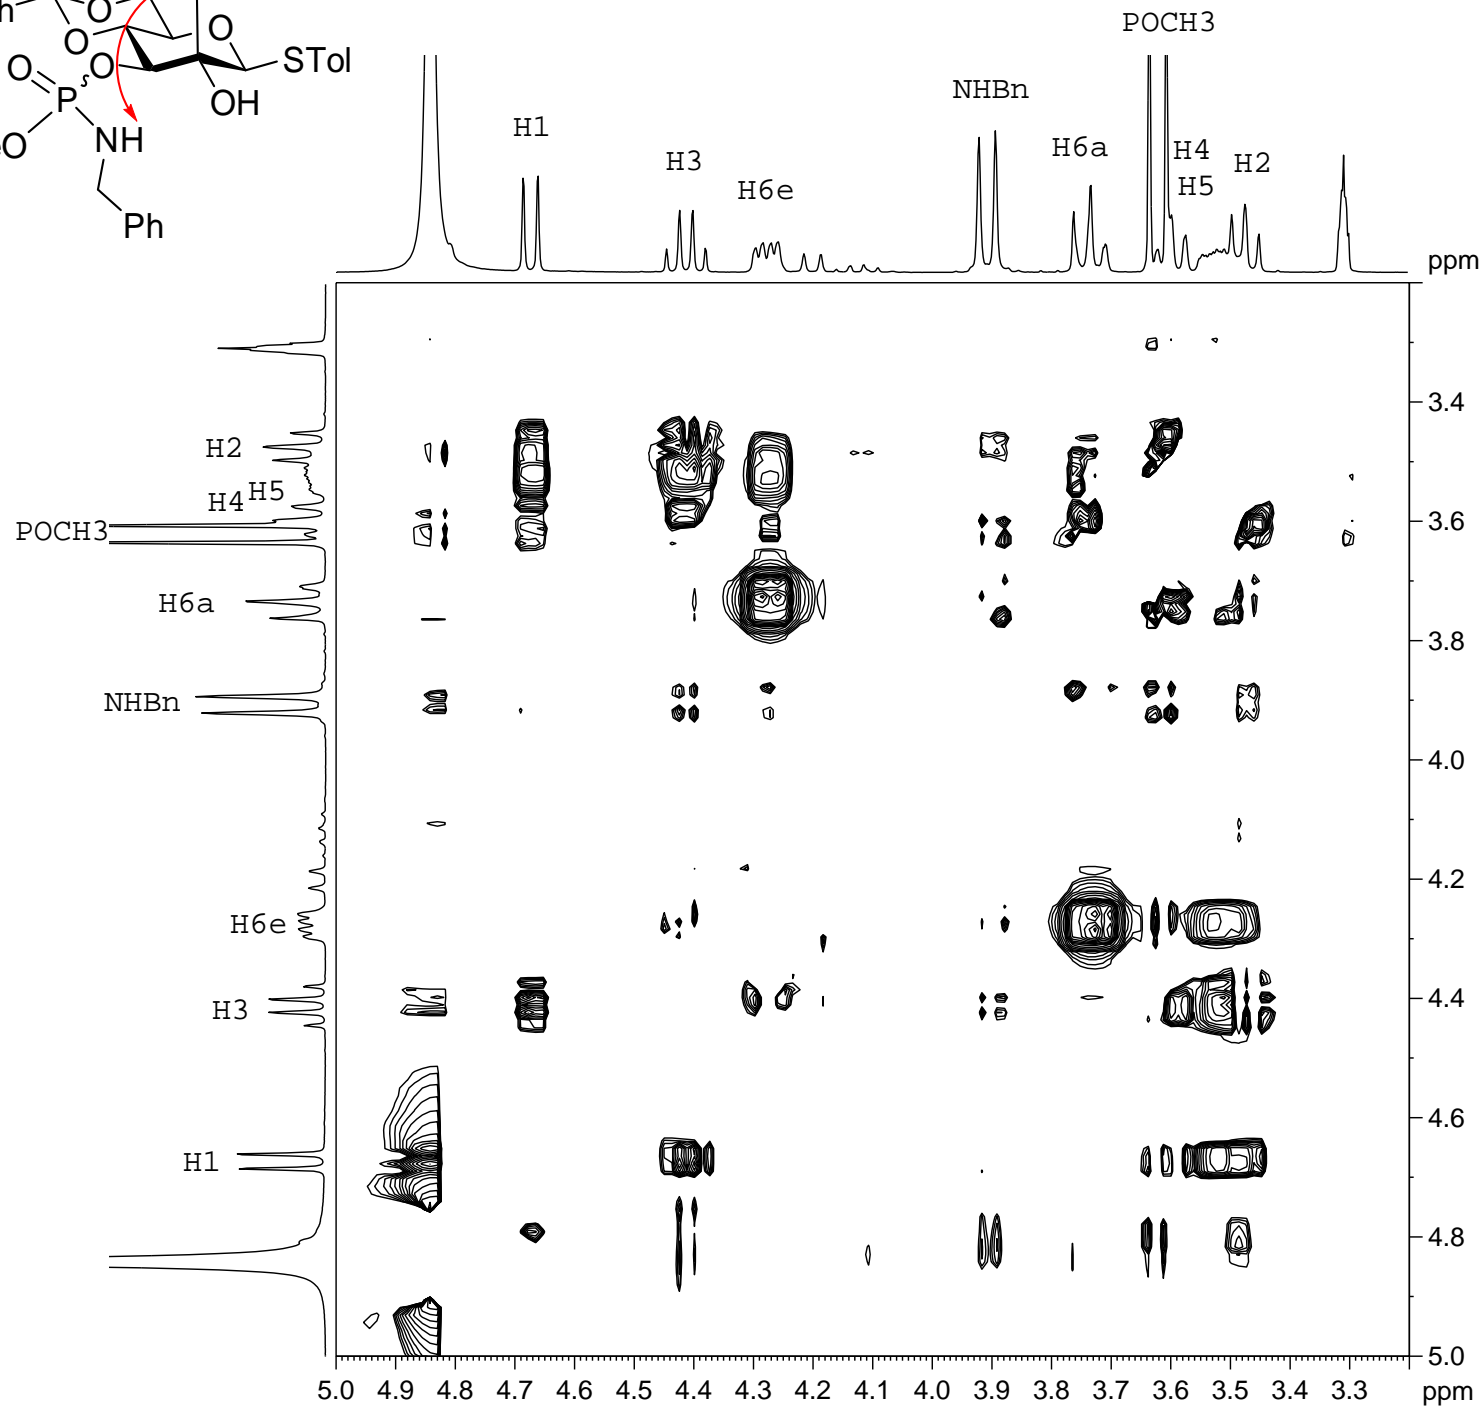

Current Data Parameters  
 NAME GPM-297-all  
 EXPNO 8  
 PROCNO 1

F2 - Acquisition Parameters  
 Date\_ 20150408  
 Time 7.32  
 INSTRUM spect  
 PROBHD 5 mm PABBO BB-  
 PULPROG noesygpphpp  
 TD 2048  
 SOLVENT MeOD  
 NS 4  
 DS 16  
 SWH 5197.505 Hz  
 FIDRES 2.537844 Hz  
 AQ 0.1970676 sec  
 RG 287  
 DW 96.200 usec  
 DE 6.50 usec  
 TE 300.0 K  
 D0 0.00007914 sec  
 D1 2.00000000 sec  
 D8 0.40000001 sec  
 D11 0.03000000 sec  
 D12 0.00002000 sec  
 D16 0.00020000 sec  
 IN0 0.00019240 sec

===== CHANNEL f1 =====  
 NUC1 1H  
 P1 13.40 usec  
 P2 26.80 usec  
 P17 2500.00 usec  
 PL1 -2.00 dB  
 PL10 3.30 dB  
 PL1W 16.12334061 W  
 PL10W 4.75833511 W  
 SFO1 400.1318006 MHz

===== GRADIENT CHANNEL =  
 GPNAM1 SMSQ10.100  
 GPNAM2 SMSQ10.100  
 GPZ1 40.00 %

7.2407  
 6.0065  
 6.0008  
 5.2600  
 5.2509  
 5.2420  
 5.2330  
 5.2237  
 4.3127  
 4.3027  
 4.2825  
 4.2725  
 4.2369  
 4.2187  
 4.2071  
 4.1886  
 4.1601  
 4.1518  
 4.1424  
 4.1341  
 4.0100  
 4.0042  
 3.9977  
 3.9922  
 3.9400  
 3.9277  
 3.9116  
 3.8988  
 3.4020  
 3.3898  
 2.1234  
 2.0931  
 2.0277

Current Data Parameters

NAME vd-758-2 all  
 EXPNO 1  
 PROCNO 1

F2 - Acquisition Parameters

Date\_ 20141230  
 Time 22.27  
 INSTRUM spect  
 PROBHD 5 mm PABBO BB-  
 PULPROG zg30  
 TD 16384  
 SOLVENT CDCl3  
 NS 64  
 DS 0  
 SWH 5597.015 Hz  
 FIDRES 0.341615 Hz  
 AQ 1.4636873 sec  
 RG 101  
 DW 89.333 usec  
 DE 6.50 usec  
 TE 300.0 K  
 D1 2.00000000 sec  
 TD0 1

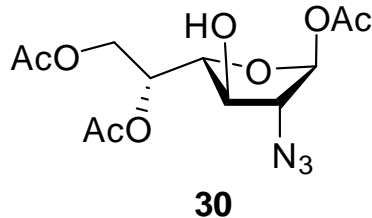

==== CHANNEL f1 =====

NUC1 1H  
 P1 13.40 usec  
 PL1 -2.00 dB  
 PL1W 16.12334061 W  
 SFO1 400.1326012 MHz

F2 - Processing parameters

SI 8192  
 SF 400.1300175 MHz  
 WDW no  
 SSB 0  
 LB 0 Hz  
 GB 0  
 PC 1.00

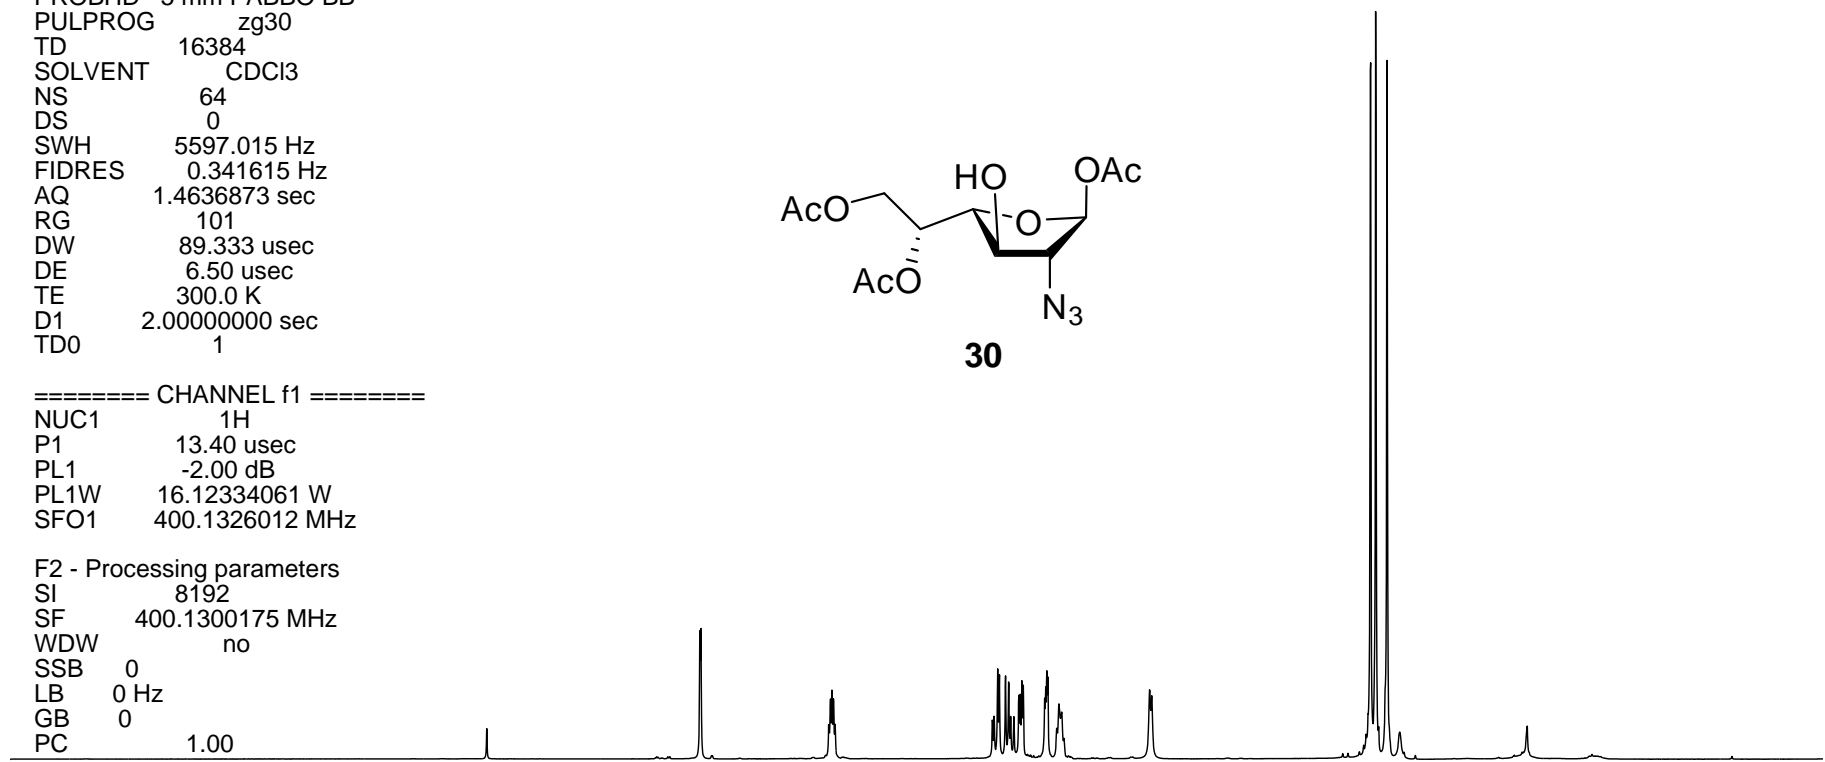

9.5 9.0 8.5 8.0 7.5 7.0 6.5 6.0 5.5 5.0 4.5 4.0 3.5 3.0 2.5 2.0 1.5 1.0 0.5 0.0 ppm

1.00  
 1.13  
 2.37  
 1.15  
 1.15  
 1.11  
 1.07  
 3.43  
 3.29  
 3.31

Current Data Parameters  
NAME vd-758-2-all-  
EXPNO 2  
PROCNO 1

F2 - Acquisition Parameters  
Date\_ 20141230  
Time 22.31  
INSTRUM spect  
PROBHD 5 mm PABBO BB-  
PULPROG zgpg30  
TD 32768  
SOLVENT CDCl3  
NS 5000  
DS 0  
SWH 23148.148 Hz  
FIDRES 0.706425 Hz  
AQ 0.7078388 sec  
RG 2050  
DW 21.600 usec  
DE 8.50 usec  
TE 300.0 K  
D1 2.00000000 sec  
D11 0.03000000 sec  
TD0 1

==== CHANNEL f1 =====  
NUC1 13C  
P1 9.80 usec  
PL1 -2.00 dB  
PL1W 55.33689499 W  
SFO1 100.6238359 MHz

==== CHANNEL f2 =====  
CPDPRG2 waltz16  
NUC2 1H  
PCPD2 90.00 usec  
PL2 -2.00 dB  
PL12 13.70 dB  
PL13 16.70 dB  
PL2W 16.12334061 W  
PL12W 0.43396533 W  
PL13W 0.21749784 W  
SFO2 400.1326011 MHz

F2 - Processing parameters  
SI 16384  
SF 100.6127721 MHz  
WDW EM  
SSB 0  
LB 3.00 Hz  
GB 0  
PC 1.00

99.51  
82.58  
77.32  
77.01  
76.69  
75.62  
71.34  
69.25  
62.81  
21.00  
20.81  
20.67

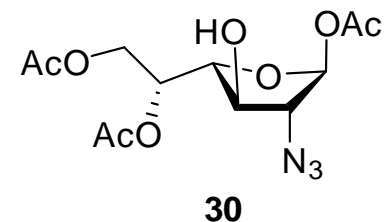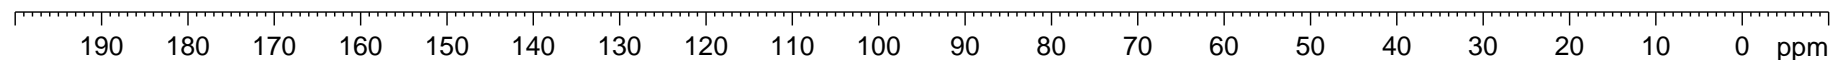

7.3473  
7.3447  
7.3276  
7.3086  
7.3001  
7.2795  
7.2587  
7.2491  
7.2409  
6.0881  
5.3413  
5.3327  
5.3240  
5.3141  
5.3044  
5.2958  
5.2874  
4.4922  
4.4880  
4.4788  
4.4728  
4.3544  
4.3456  
4.3406  
4.3322  
4.3268  
4.3183  
4.3016  
4.2911  
4.2828  
4.2722  
4.2614  
4.2532  
4.2408  
4.2331  
4.1906  
4.1730  
4.1609  
4.1422  
4.1392  
4.1363  
4.1328  
4.1043  
4.0868  
4.0772  
4.0596  
3.7168  
3.7076  
3.6885  
3.6798  
3.2829  
2.1200  
2.0942  
2.0697  
2.0630  
2.0579  
2.0146  
1.9986

Current Data Parameters

NAME vd-759 all  
EXPNO 1  
PROCNO 1

F2 - Acquisition Parameters

Date\_ 20150101  
Time 23.03  
INSTRUM spect  
PROBHD 5 mm PABBO BB-  
PULPROG zg30  
TD 16384  
SOLVENT CDCl3  
NS 64  
DS 0  
SWH 5597.015 Hz  
FIDRES 0.341615 Hz  
AQ 1.4636873 sec  
RG 101  
DW 89.333 usec  
DE 6.50 usec  
TE 300.0 K  
D1 2.00000000 sec  
TD0 1

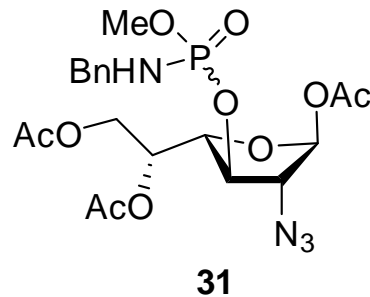

==== CHANNEL f1 =====

NUC1 1H  
P1 13.40 usec  
PL1 -2.00 dB  
PL1W 16.12334061 W  
SFO1 400.1326012 MHz

F2 - Processing parameters

SI 8192  
SF 400.1300175 MHz  
WDW no  
SSB 0  
LB 0 Hz  
GB 0  
PC 1.00

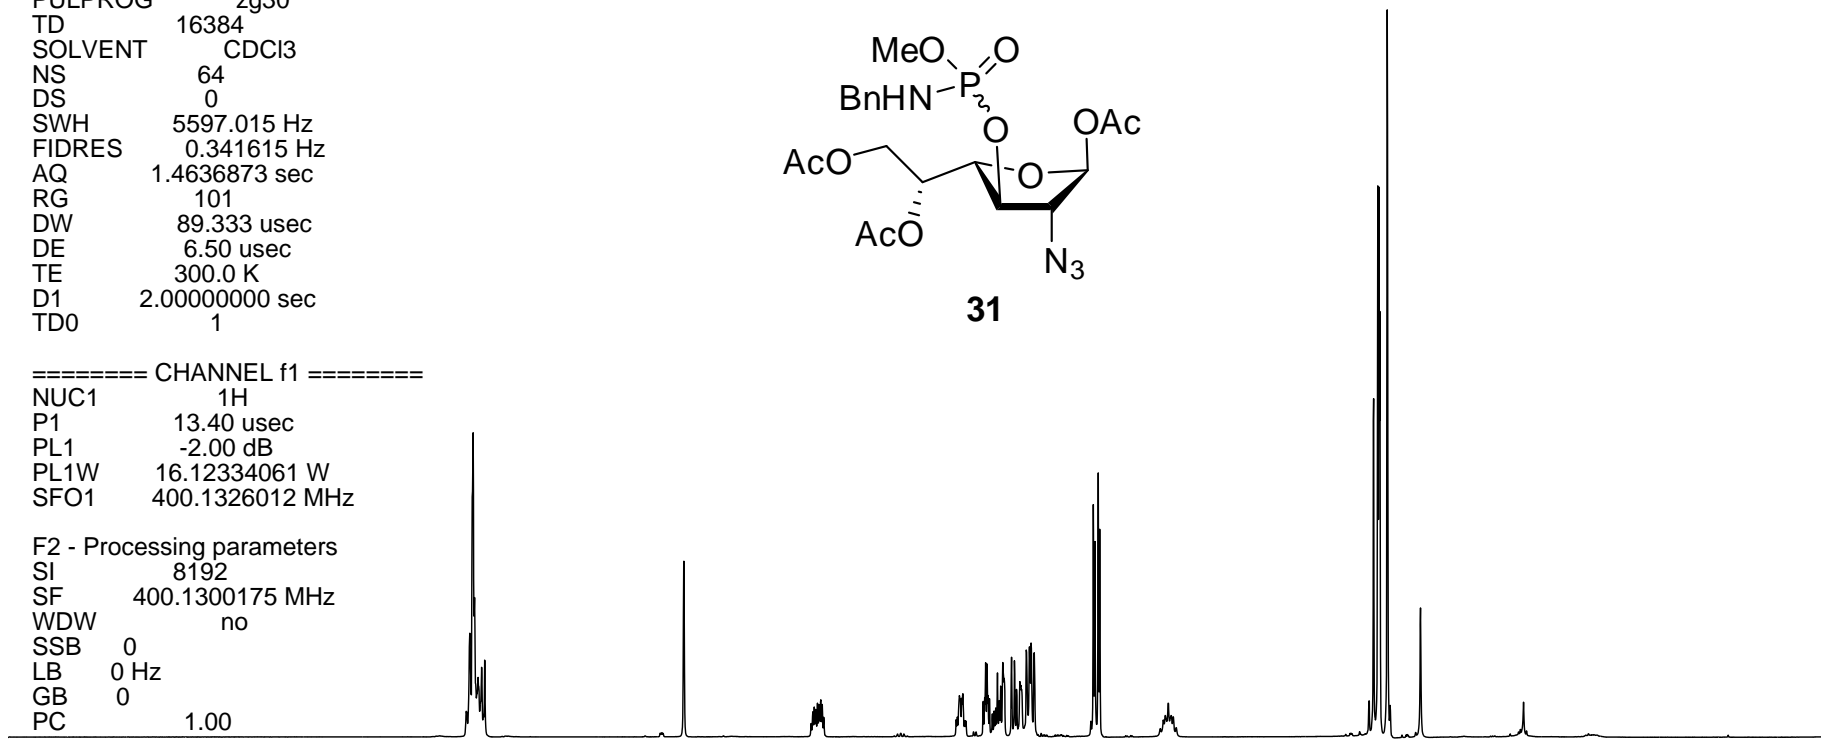

9.5 9.0 8.5 8.0 7.5 7.0 6.5 6.0 5.5 5.0 4.5 4.0 3.5 3.0 2.5 2.0 1.5 1.0 0.5 0.0 ppm

10.71  
2.00  
2.27  
2.16  
2.19  
3.49  
3.35  
4.55  
3.29  
3.18  
2.18  
2.90  
10.09  
6.47

Current Data Parameters  
NAME vd-759  
EXPNO 2  
PROCNO 1

F2 - Acquisition Parameters

Date\_ 20150101  
Time 23.04  
INSTRUM spect  
PROBHD 5 mm PABBO BB-  
PULPROG zgpg30  
TD 32768  
SOLVENT CDCl3  
NS 6000  
DS 0  
SWH 23148.148 Hz  
FIDRES 0.706425 Hz  
AQ 0.7078388 sec  
RG 2050  
DW 21.600 usec  
DE 8.50 usec  
TE 300.0 K  
D1 2.00000000 sec  
D11 0.03000000 sec  
TD0 1

==== CHANNEL f1 =====  
NUC1 13C  
P1 9.80 usec  
PL1 -2.00 dB  
PL1W 55.33689499 W  
SFO1 100.6238359 MHz

==== CHANNEL f2 =====  
CPDPRG2 waltz16  
NUC2 1H  
PCPD2 90.00 usec  
PL2 -2.00 dB  
PL12 13.70 dB  
PL13 16.70 dB  
PL2W 16.12334061 W  
PL12W 0.43396533 W  
PL13W 0.21749784 W  
SFO2 400.1326011 MHz

F2 - Processing parameters  
SI 16384  
SF 100.6127721 MHz  
WDW EM  
SSB 0  
LB 3.00 Hz  
GB 0  
PC 1.00

170.38  
170.33  
170.23  
169.29  
  
139.02  
138.97  
128.69  
127.63  
127.37  
127.32  
  
99.95  
99.90  
83.12  
83.06  
82.88  
82.80  
78.72  
77.32  
77.00  
76.69  
70.62  
70.60  
70.37  
70.33  
68.76  
68.67  
62.62  
62.55  
53.45  
53.42  
45.36  
  
20.92  
20.69  
20.65

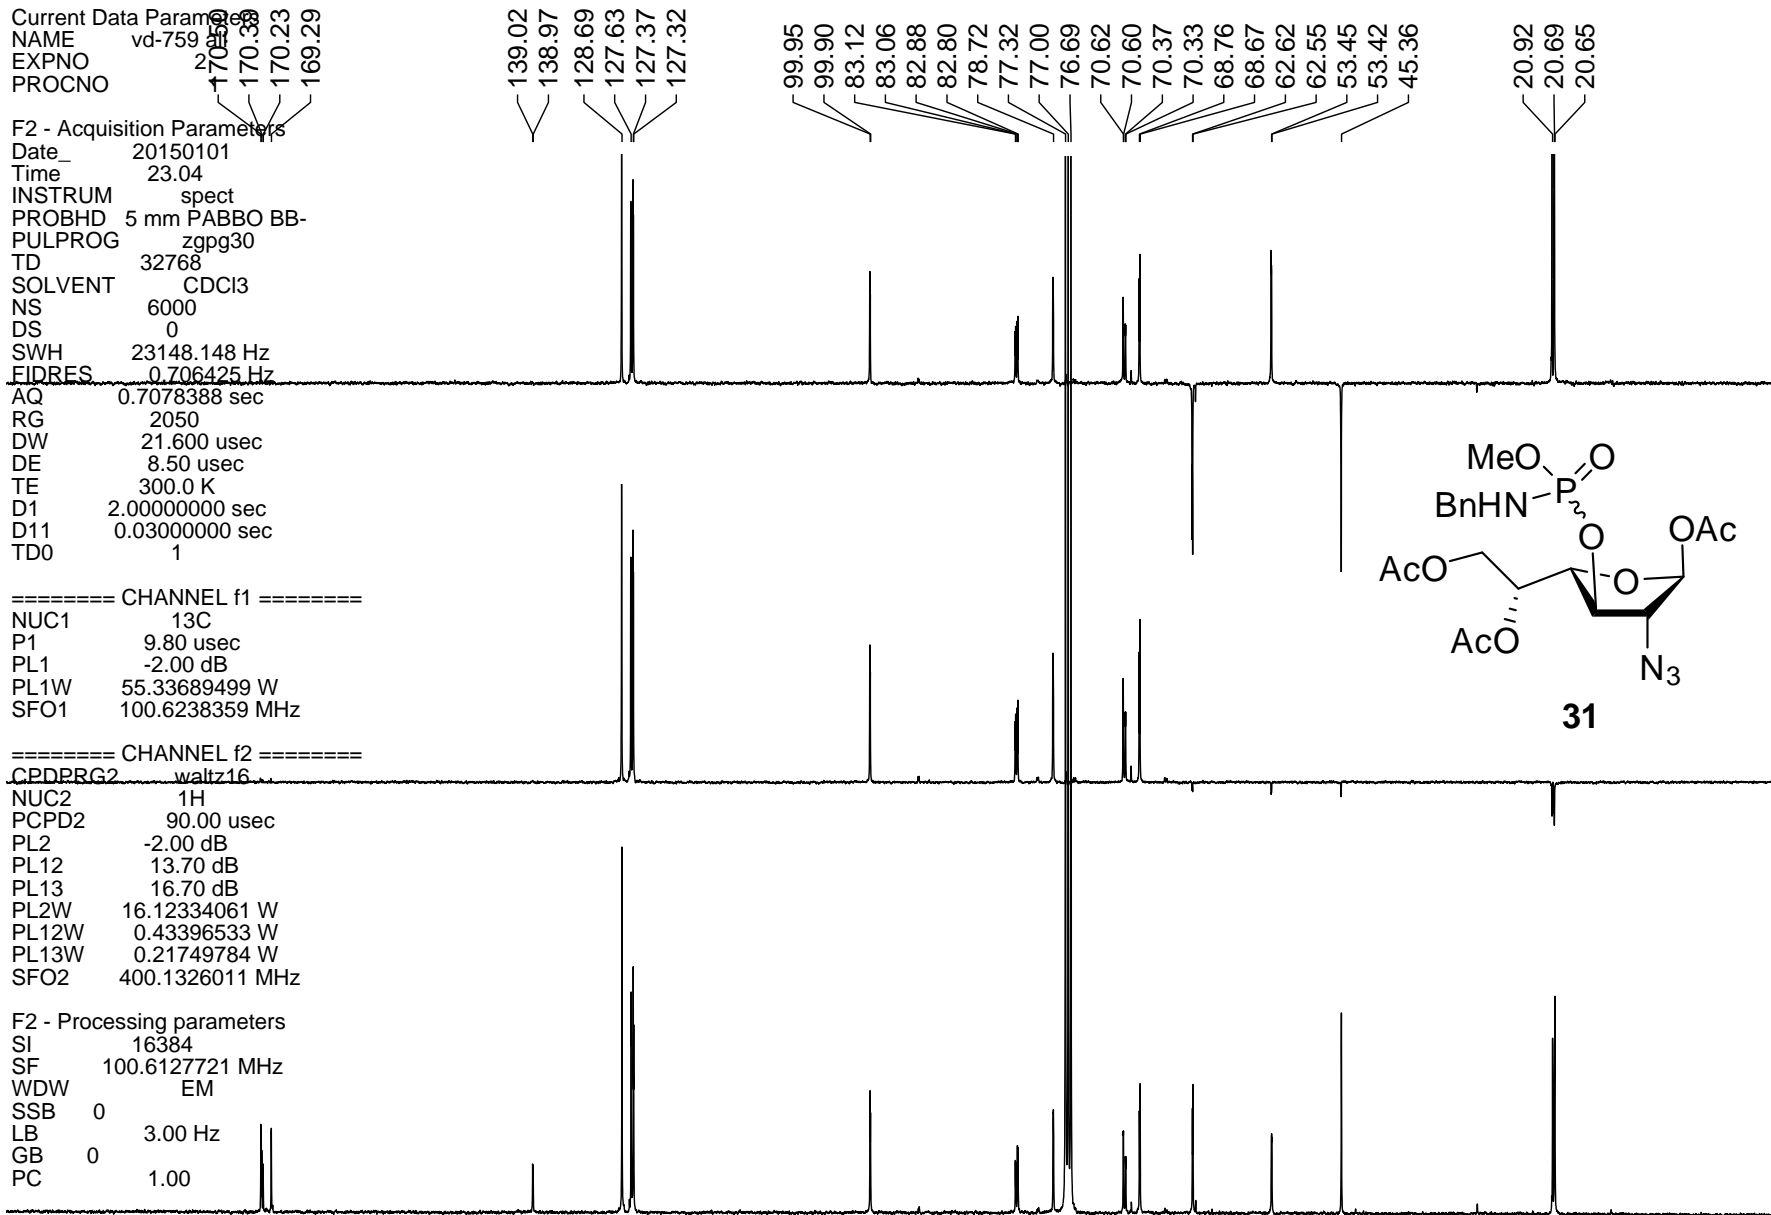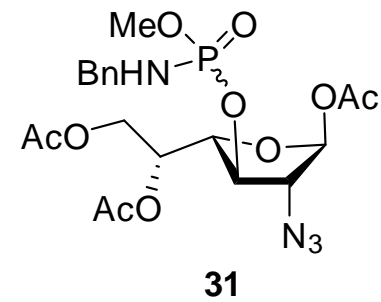

190 180 170 160 150 140 130 120 110 100 90 80 70 60 50 40 30 20 10 0 ppm

Current Data Parameters

NAME vd-759 P31  
EXPNO 1  
PROCNO 1

F2 - Acquisition Parameters

Date\_ 20150101  
Time 22.55  
INSTRUM spect  
PROBHD 5 mm PABBO BB-  
PULPROG zgpg30  
TD 65536  
SOLVENT CDCl3  
NS 24  
DS 0  
SWH 104166.664 Hz  
FIDRES 1.589457 Hz  
AQ 0.3146228 sec  
RG 2050  
DW 4.800 usec  
DE 6.50 usec  
TE 300.0 K  
D1 2.00000000 sec  
D11 0.03000000 sec  
TD0 1

==== CHANNEL f1 =====

NUC1 31P  
P1 13.50 usec  
PL1 2.00 dB  
PL1W 16.00742149 W  
SFO1 161.9755930 MHz

==== CHANNEL f2 =====

CPDPRG2 waltz16  
NUC2 1H  
PCPD2 90.00 usec  
PL2 -2.00 dB  
PL12 13.70 dB  
PL13 16.70 dB  
PL2W 16.12334061 W  
PL12W 0.43396533 W  
PL13W 0.21749784 W  
SFO2 400.1320007 MHz

F2 - Processing parameters

SI 32768  
SF 161.9755127 MHz  
WDW EM  
SSB 0  
LB 1.00 Hz  
GB 0  
PC 1.00

9.7669  
9.5678

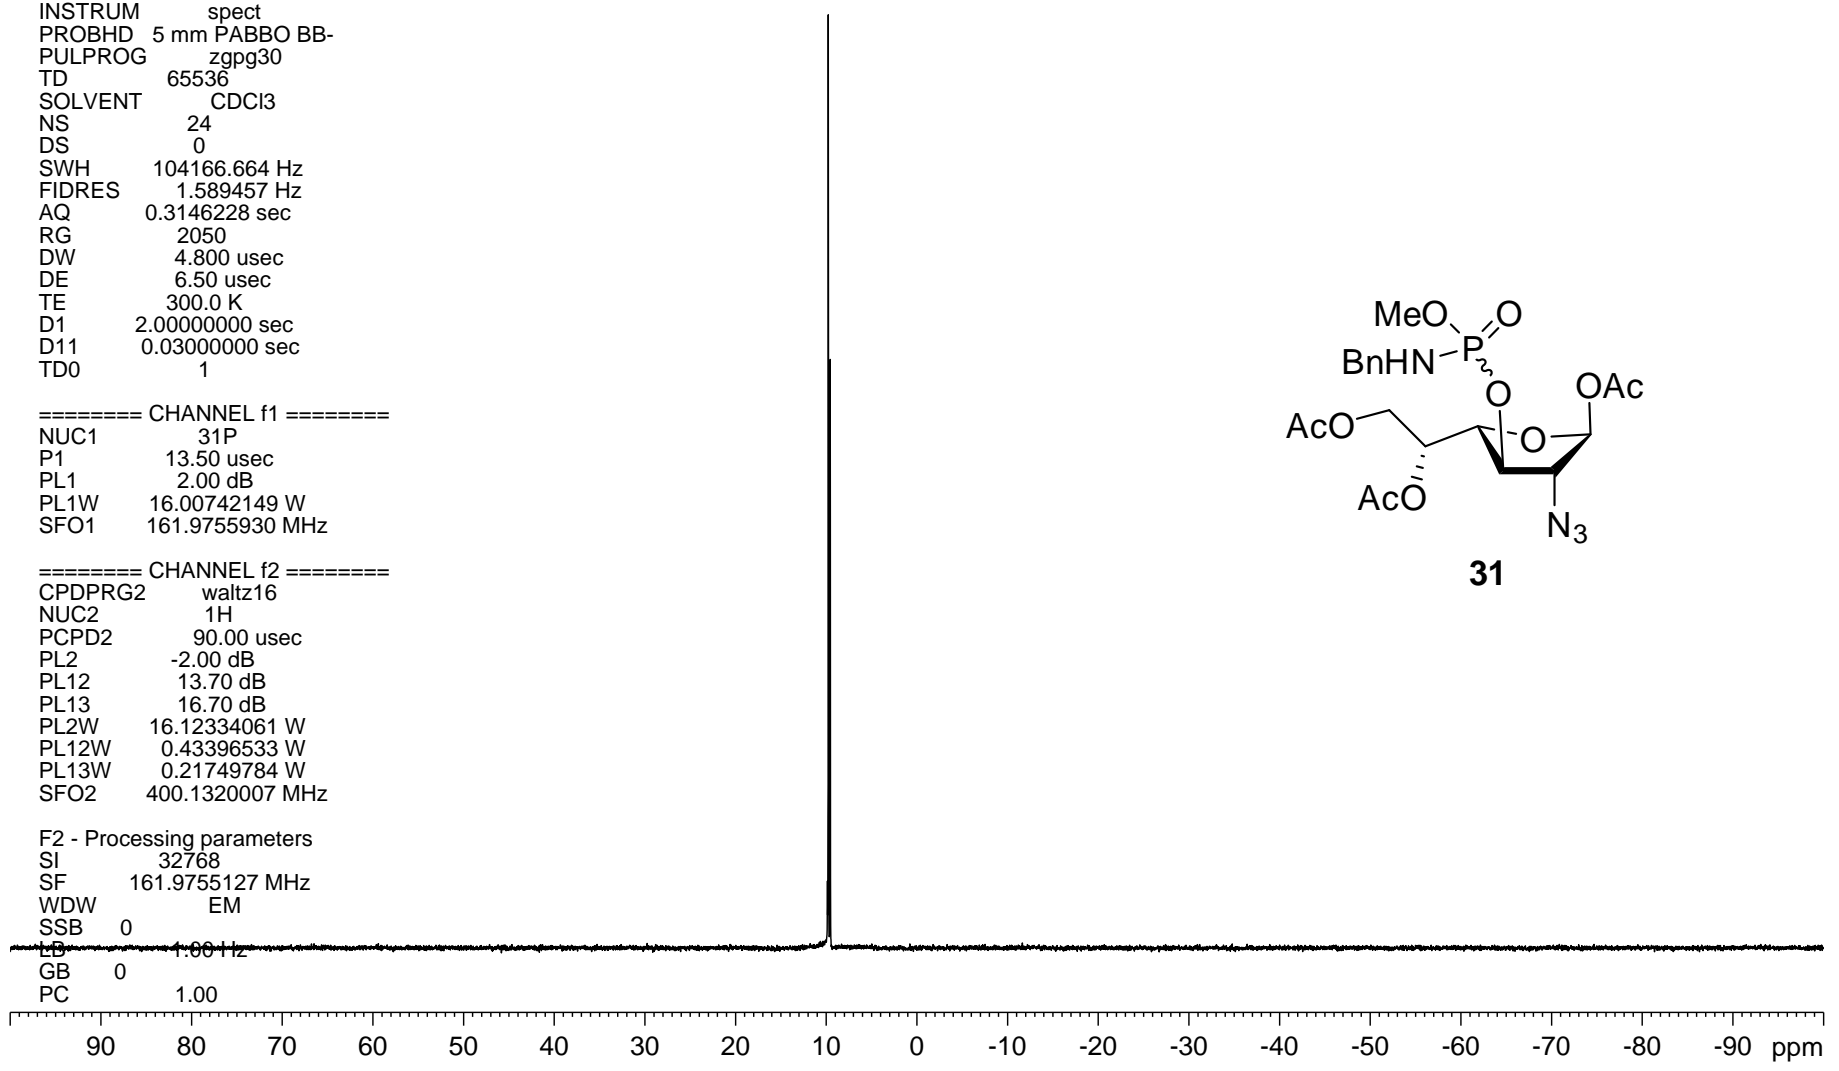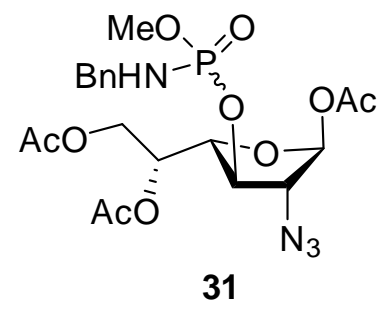

8.0442  
8.0246  
7.5432  
7.5241  
7.4379  
7.4189  
7.3995  
7.2407

4.7795  
4.7698  
4.5768  
4.5650  
4.5478  
4.5343  
4.5136  
4.5037  
4.4847  
4.3216  
4.3075  
4.3025  
4.2872  
4.2726  
4.2566  
3.8741  
3.8636  
3.4259  
2.4711  
2.4581

1.4936  
1.3375

Current Data Parameters

NAME vd-771 all  
EXPNO 1  
PROCNO 1

F2 - Acquisition Parameters

Date\_ 20150504  
Time 21.53  
INSTRUM spect  
PROBHD 5 mm PABBO BB-  
PULPROG zg30  
TD 16384  
SOLVENT CDCl3  
NS 64  
DS 0  
SWH 5597.015 Hz  
FIDRES 0.341615 Hz  
AQ 1.4636873 sec  
RG 114  
DW 89.333 usec  
DE 6.50 usec  
TE 300.0 K  
D1 2.00000000 sec  
TD0 1

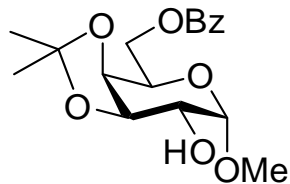

32

==== CHANNEL f1 =====

NUC1 1H  
P1 13.40 usec  
PL1 -2.00 dB  
PL1W 16.12334061 W  
SFO1 400.1326012 MHz

F2 - Processing parameters

SI 8192  
SF 400.1300175 MHz  
WDW no  
SSB 0  
LB 0 Hz  
GB 0  
PC 1.00

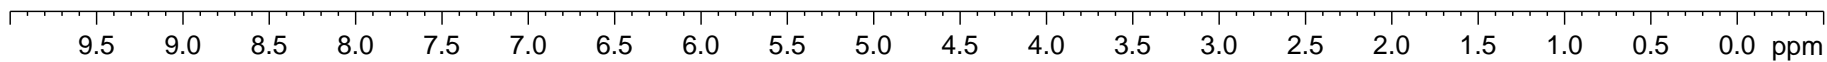

1.98  
1.04  
2.08

1.00  
2.19  
3.21  
1.04

3.13

0.95

3.17  
3.16



Current Data Parameters  
NAME vd-771 all  
EXPNO 2  
PROCNO 1

F2 - Acquisition Parameters

Date\_ 20150504  
Time 21.56  
INSTRUM spect  
PROBHD 5 mm PABBO BB-  
PULPROG zgpg30  
TD 32768  
SOLVENT CDCl3  
NS 6000  
DS 0  
SWH 23148.148 Hz  
FIDRES 0.706425 Hz  
AQ 0.7078388 sec  
RG 2050  
DW 21.600 usec  
DE 8.50 usec  
TE 300.0 K  
D1 2.00000000 sec  
D11 0.03000000 sec  
TD0 1

=====  
CHANNEL f1  
=====  
NUC1 13C  
P1 9.80 usec  
PL1 -2.00 dB  
PL1W 55.33689499 W  
SFO1 100.6238359 MHz

=====  
CHANNEL f2  
=====  
CPDPRG2 waltz16  
NUC2 1H  
PCPD2 90.00 usec  
PL2 -2.00 dB  
PL12 13.70 dB  
PL13 16.70 dB  
PL2W 16.12334061 W  
PL12W 0.43396533 W  
PL13W 0.21749784 W  
SFO2 400.1326011 MHz

F2 - Processing parameters  
SI 16384  
SF 100.6127475 MHz  
WDW EM  
SSB 0  
LB 3.00 Hz  
GB 0  
PC 1.00

133.27  
130.26  
129.83  
128.60  
110.16  
98.26  
77.55  
77.44  
77.23  
76.92  
76.02  
73.23  
69.10  
66.80  
64.33  
55.52  
27.70  
26.01

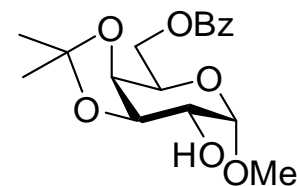

32

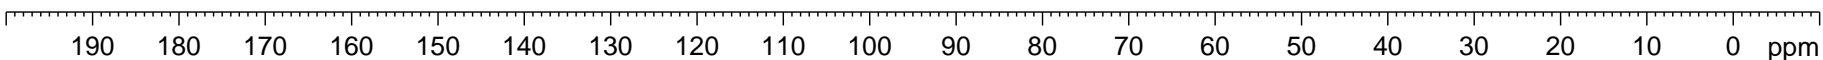

8.0420  
 8.0234  
 7.5679  
 7.5493  
 7.5308  
 7.4432  
 7.4242  
 7.4054  
 7.3181  
 7.3057  
 7.2856  
 7.2407  
 4.9875  
 4.9794  
 4.9142  
 4.9059  
 4.6193  
 4.6072  
 4.5911  
 4.5781  
 4.5647  
 4.5562  
 4.5375  
 4.5085  
 4.4586  
 4.4497  
 4.4385  
 4.4301  
 4.4182  
 4.4099  
 4.3928  
 4.3841  
 4.3735  
 4.3637  
 4.3464  
 4.3290  
 4.3166  
 4.3102  
 4.2969  
 4.2784  
 4.2662  
 4.1769  
 4.1571  
 4.1388  
 4.1152  
 4.0962  
 3.7165  
 3.6892  
 3.6601  
 3.4058  
 3.3415  
 3.1193  
 3.1010  
 3.0759  
 1.5187  
 1.4572  
 1.3318  
 1.3159

Current Data Parameters

NAME vd-772 all  
 EXPNO 1  
 PROCNO 1

F2 - Acquisition Parameters

Date\_ 20150430  
 Time 21.48  
 INSTRUM spect  
 PROBHD 5 mm PABBO BB-  
 PULPROG zg30  
 TD 16384  
 SOLVENT CDCl3  
 NS 64  
 DS 0  
 SWH 5597.015 Hz  
 FIDRES 0.341615 Hz  
 AQ 1.4636873 sec  
 RG 114  
 DW 89.333 usec  
 DE 6.50 usec  
 TE 300.0 K  
 D1 2.00000000 sec  
 TD0 1

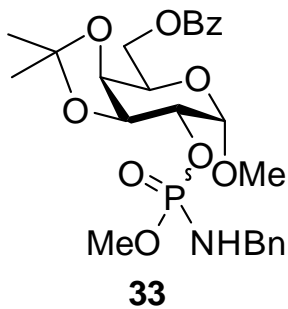

==== CHANNEL f1 =====

NUC1 1H  
 P1 13.40 usec  
 PL1 -2.00 dB  
 PL1W 16.12334061 W  
 SFO1 400.1326012 MHz

F2 - Processing parameters

SI 8192  
 SF 400.1300175 MHz  
 WDW no  
 SSB 0  
 LB 0 Hz  
 GB 0  
 PC 1.00

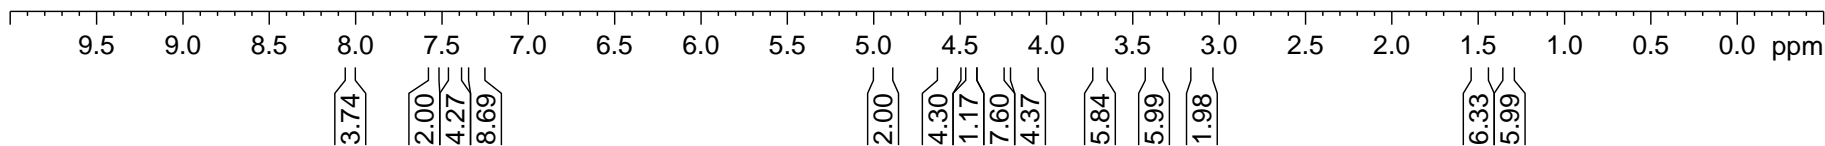

Current Data Parameters  
NAME vd-772 all  
EXPNO 2  
PROCNO 1

F2 - Acquisition Parameters  
Date\_ 20150430  
Time 21.51  
INSTRUM spect  
PROBHD 5 mm PABBO BB-  
PULPROG zgpg30  
TD 32768  
SOLVENT CDCl3  
NS 6000  
DS 0  
SWH 23148.148 Hz  
FIDRES 0.706425 Hz  
AQ 0.7078388 sec  
RG 2050  
DW 21.600 usec  
DE 8.50 usec  
TE 300.0 K  
D1 2.00000000 sec  
D11 0.03000000 sec  
TD0 1

=====  
CHANNEL f1  
=====  
NUC1 13C  
P1 9.80 usec  
PL1 -2.00 dB  
PL1W 55.33689499 W  
SFO1 100.6238359 MHz

=====  
CHANNEL f2  
=====  
CPDPRG2 waltz16  
NUC2 1H  
PCPD2 90.00 usec  
PL2 -2.00 dB  
PL12 13.70 dB  
PL13 16.70 dB  
PL2W 16.12334061 W  
PL12W 0.43396533 W  
PL13W 0.21749784 W  
SFO2 400.1326011 MHz

F2 - Processing parameters  
SI 16384  
SF 100.6127475 MHz  
WDW EM  
SSB 0  
LB 3.00 Hz  
GB 0  
PC 1.00

139.83  
139.76  
139.68  
133.32  
130.19  
129.84  
128.78  
128.63  
127.70  
127.58  
110.26  
110.17  
98.54  
98.29  
77.55  
77.44  
77.24  
76.92  
75.04  
74.98  
74.92  
74.86  
74.79  
74.75  
73.93  
66.04  
65.76  
64.15  
55.86  
55.76  
53.65  
53.59  
53.47  
53.42  
45.68  
45.58  
28.19  
28.07  
26.56

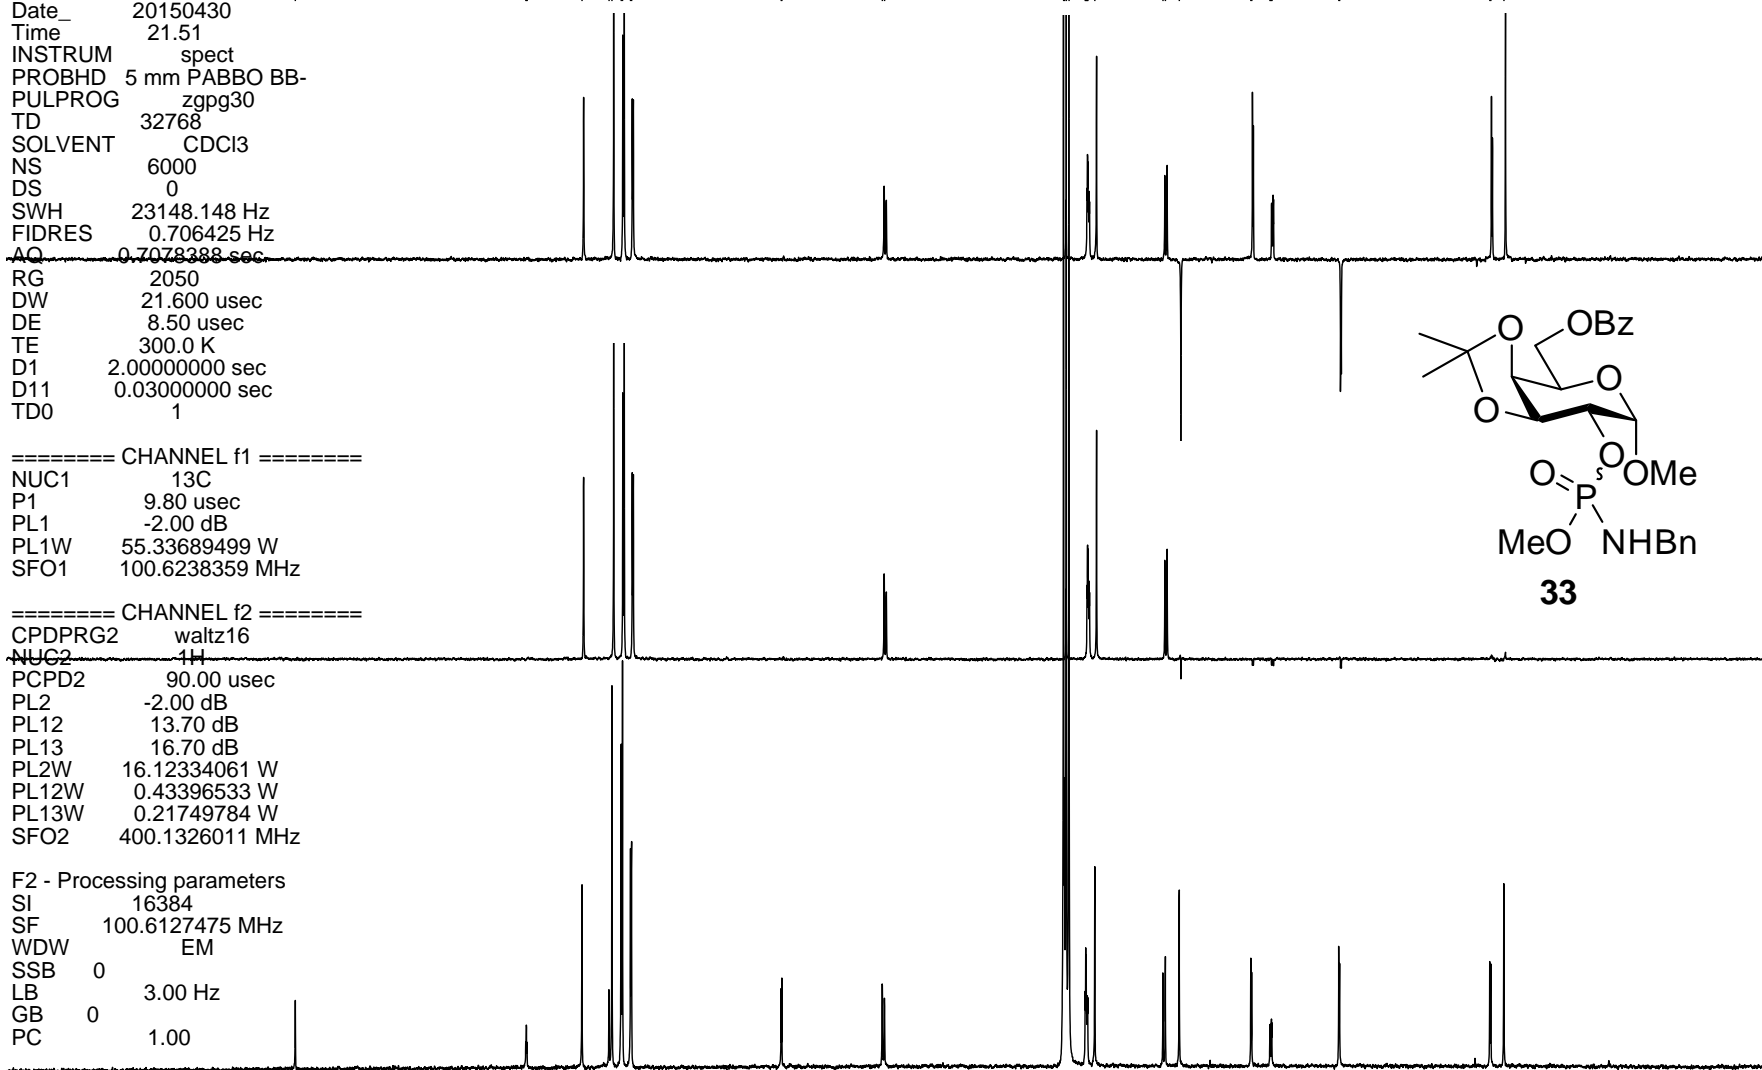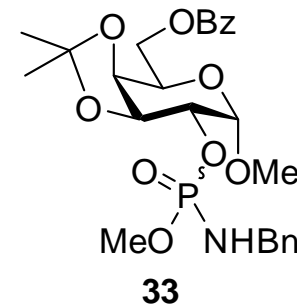

190 180 170 160 150 140 130 120 110 100 90 80 70 60 50 40 30 20 10 0 ppm

Current Data Parameters

NAME vd-772 P31  
EXPNO 2  
PROCNO 1

F2 - Acquisition Parameters

Date\_ 20150430  
Time 21.30  
INSTRUM spect  
PROBHD 5 mm PABBO BB-  
PULPROG zgpg30  
TD 65536  
SOLVENT CDCl3  
NS 36  
DS 0  
SWH 104166.664 Hz  
FIDRES 1.589457 Hz  
AQ 0.3146228 sec  
RG 2050  
DW 4.800 usec  
DE 6.50 usec  
TE 300.0 K  
D1 2.00000000 sec  
D11 0.03000000 sec  
TD0 1

==== CHANNEL f1 =====

NUC1 31P  
P1 13.50 usec  
PL1 2.00 dB  
PL1W 16.00742149 W  
SFO1 161.9755930 MHz

==== CHANNEL f2 =====

CPDPRG2 waltz16  
NUC2 1H  
PCPD2 90.00 usec  
PL2 -2.00 dB  
PL12 13.70 dB  
PL13 16.70 dB  
PL2W 16.12334061 W  
PL12W 0.43396533 W  
PL13W 0.21749784 W  
SFO2 400.1320007 MHz

F2 - Processing parameters

SI 32768  
SF 161.9755127 MHz  
WDW EM  
SSB 0  
LB 1.00 Hz  
GB 0  
PC 1.00

10.7385  
9.7683

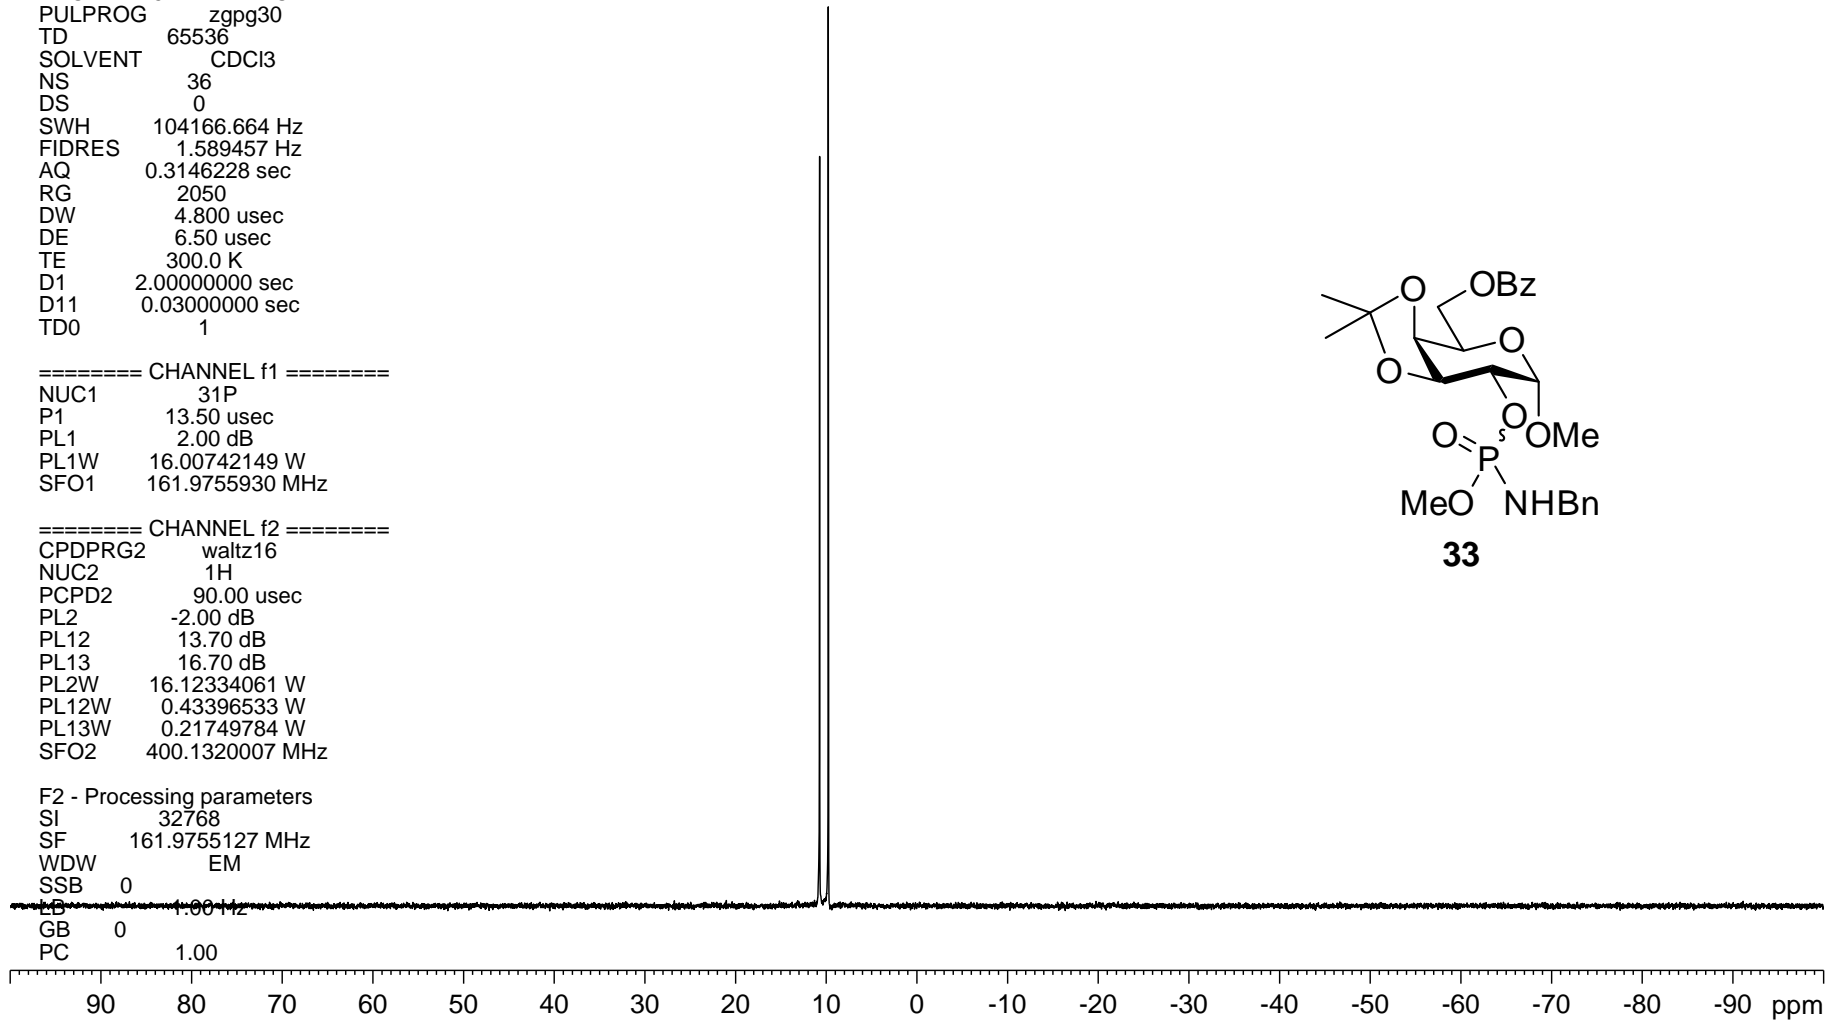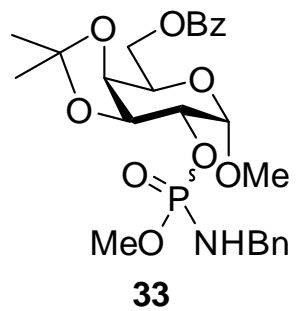

4.6772  
 4.6703  
 4.2547  
 4.2513  
 4.2423  
 4.2387  
 4.2327  
 4.2291  
 4.2203  
 4.2169  
 4.1622  
 4.1583  
 4.1484  
 4.1387  
 4.1335  
 4.1297  
 4.1265  
 4.1164  
 4.1113  
 3.7290  
 3.7259  
 3.7063  
 3.7032  
 3.6897  
 3.6796  
 3.6689  
 3.6371  
 3.6186  
 3.6000  
 3.4082  
 3.3992  
 3.3867  
 3.3793  
 3.3485  
 3.3412  
 3.3270  
 3.3214  
 3.3096  
 3.3068  
 3.2897

NAME SL-84  
 EXPNO 1  
 PROCNO 1  
 Date\_ 20150610  
 Time 11.48  
 INSTRUM spect  
 PROBHD 5 mm PABBO BB/  
 PULPROG zg30  
 TD 32768  
 SOLVENT MeOD  
 NS 16  
 DS 2  
 SWH 5252.101 Hz  
 FIDRES 0.160281 Hz  
 AQ 3.1195636 sec  
 RG 200.35  
 DW 95.200 usec  
 DE 14.57 usec  
 TE 298.0 K  
 D1 2.00000000 sec  
 TD0 1

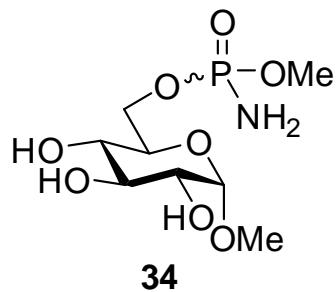

==== CHANNEL f1 =====  
 SFO1 500.1325007 MHz  
 NUC1 1H  
 P1 15.50 usec  
 SI 16384  
 SF 500.1300092 MHz  
 WDW no  
 SSB 0  
 LB 0.00 Hz  
 GB 0  
 PC 1.00

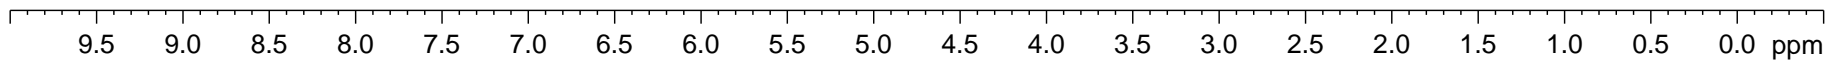

2.00  
 2.04  
 2.04  
 6.08  
 2.14  
 2.36  
 8.22  
 2.27

NAME SL-84  
EXPNO 6  
PROCNO 1  
Date\_ 20150610  
Time 11.55  
INSTRUM spect  
PROBHD 5 mm PABBO BB/  
PULPROG zgpg60  
TD 32768  
SOLVENT MeOD  
NS 903

SWH 31250.000 Hz  
FIDRES 0.953674 Hz  
AQ 0.5243380 sec  
RG 200.35  
DW 16.000 usec  
DE 6.50 usec  
TE 298.3 K  
D1 3.00000000 sec  
D11 0.03000000 sec  
TD0 1

==== CHANNEL f1 =====  
SFO1 125.7722511 MHz  
NUC1 13C  
P1 10.50 usec  
SI 32768  
SF 125.7576123 MHz  
WDW EM  
SSB 0  
LB 3.00 Hz  
GB 0  
PC 1.00

101.33  
74.99  
73.45  
72.06  
72.03  
72.00  
71.33  
71.26  
66.89  
66.82  
66.78  
55.66  
53.76  
53.72  
49.51  
49.34  
49.17  
49.00  
48.83  
48.66  
48.49

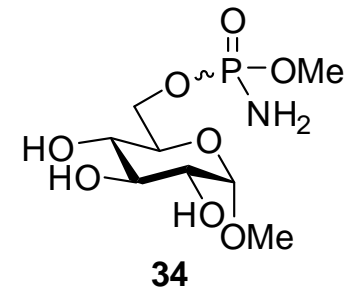

190 180 170 160 150 140 130 120 110 100 90 80 70 60 50 40 30 20 10 0 ppm

NAME SL-84  
EXPNO 9  
PROCNO 1  
Date\_ 20150610  
Time 11.52  
INSTRUM spect  
PROBHD 5 mm PABBO BB/  
PULPROG zgpg30  
TD 65536  
SOLVENT MeOD  
NS 16  
DS 4  
SWH 40760.871 Hz  
FIDRES 0.621962 Hz  
AQ 0.8039582 sec  
RG 200.35  
DW 12.267 usec  
DE 6.50 usec  
TE 298.1 K  
D1 2.00000000 sec  
D11 0.03000000 sec  
TD0 1

==== CHANNEL f1 =====  
SFO1 202.4462121 MHz  
NUC1 31P  
P1 12.50 usec  
SI 32768  
SF 202.4563350 MHz  
WDW no  
SSB 0  
LB 0.00 Hz  
GB 0  
PC 1.40

13.9218

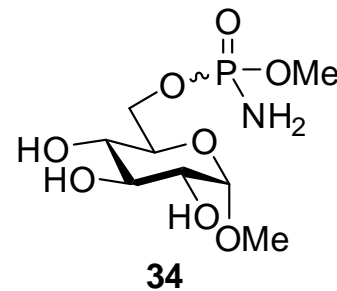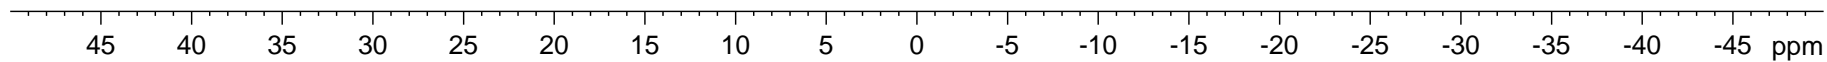

7.2388  
5.4884  
5.4775  
5.4642  
5.4533  
5.4395  
5.4286  
5.1205  
5.1164  
5.0923  
5.0679  
4.9399  
4.9310  
4.8809  
4.8740  
4.8655  
4.8556  
4.8485  
4.8399  
4.1385  
4.1230  
4.1103  
4.1019  
4.0955  
4.0848  
3.9669  
3.9516  
3.9418  
3.7460  
3.7415  
3.7171  
3.7129  
3.3918  
2.8229  
2.0509  
2.0276  
2.0155  
1.9827

Current Data Parameters

NAME GPM-339  
EXPNO 1  
PROCNO 1

F2 - Acquisition Parameters

Date\_ 20150605  
Time 17.33  
INSTRUM spect  
PROBHD 5 mm PABBO BB-  
PULPROG zg30  
TD 16384  
SOLVENT CDCl3  
NS 16  
DS 0  
SWH 5597.015 Hz  
FIDRES 0.341615 Hz  
AQ 1.4636873 sec  
RG 322  
DW 89.333 usec  
DE 6.50 usec  
TE 300.0 K  
D1 2.00000000 sec  
TD0 1

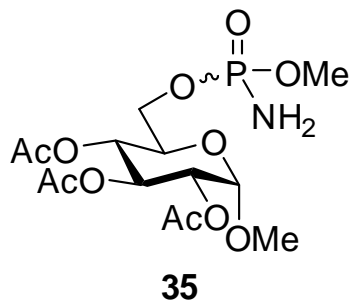

==== CHANNEL f1 =====

NUC1 1H  
P1 13.40 usec  
PL1 -2.00 dB  
PL1W 16.12334061 W  
SFO1 400.1326012 MHz

F2 - Processing parameters

SI 8192  
SF 400.1300182 MHz  
WDW no  
SSB 0  
LB 0 Hz  
GB 0  
PC 1.00

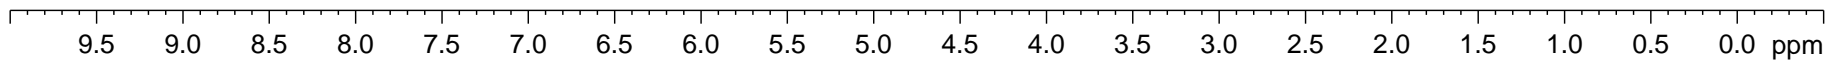

1.96  
2.01  
2.00  
1.98  
4.17  
2.06  
3.00  
2.96  
6.00  
3.68  
6.01  
6.09  
5.86



NAME GPM-339-repeat-all  
 EXPNO 2  
 PROCNO 1  
 Date\_ 20150607  
 Time 21.38  
 INSTRUM spect  
 PROBHD 5 mm PABBO BB-  
 PULPROG zgpg30  
 TD 32768  
 SOLVENT CDCl3  
 NS 6000  
 DS 0  
 SWH 23148.148 Hz  
 FIDRES 0.706425 Hz  
 AQ 0.7078388 sec  
 RG 2050  
 DW 21.600 usec  
 DE 8.50 usec  
 TE 300.0 K  
 D1 2.00000000 sec  
 D11 0.03000000 sec  
 TD0 1

===== CHANNEL f1 =====  
 NUC1 13C  
 P1 9.60 usec  
 PL1 -2.00 dB  
 PL1W 55.33689499 W  
 SFO1 100.6238359 MHz

===== CHANNEL f2 =====  
 CPDPRG2 waltz16  
 NUC2 1H  
 PCPD2 90.00 usec  
 PL2 -2.00 dB  
 PL12 14.20 dB  
 PL13 17.20 dB  
 PL2W 16.12334061 W  
 PL12W 0.38677201 W  
 PL13W 0.19384515 W  
 SFO2 400.1326011 MHz  
 SI 16384  
 SF 100.6127491 MHz  
 WDW EM  
 SSB 0  
 LB 3.00 Hz  
 GB 0  
 PC 1.00

96.84 77.31 77.00 76.68 70.79 70.16 68.47 68.31 67.91 67.79 67.71 64.36 64.32 64.22 64.18 55.56 55.53 53.47 53.42 20.64 20.62

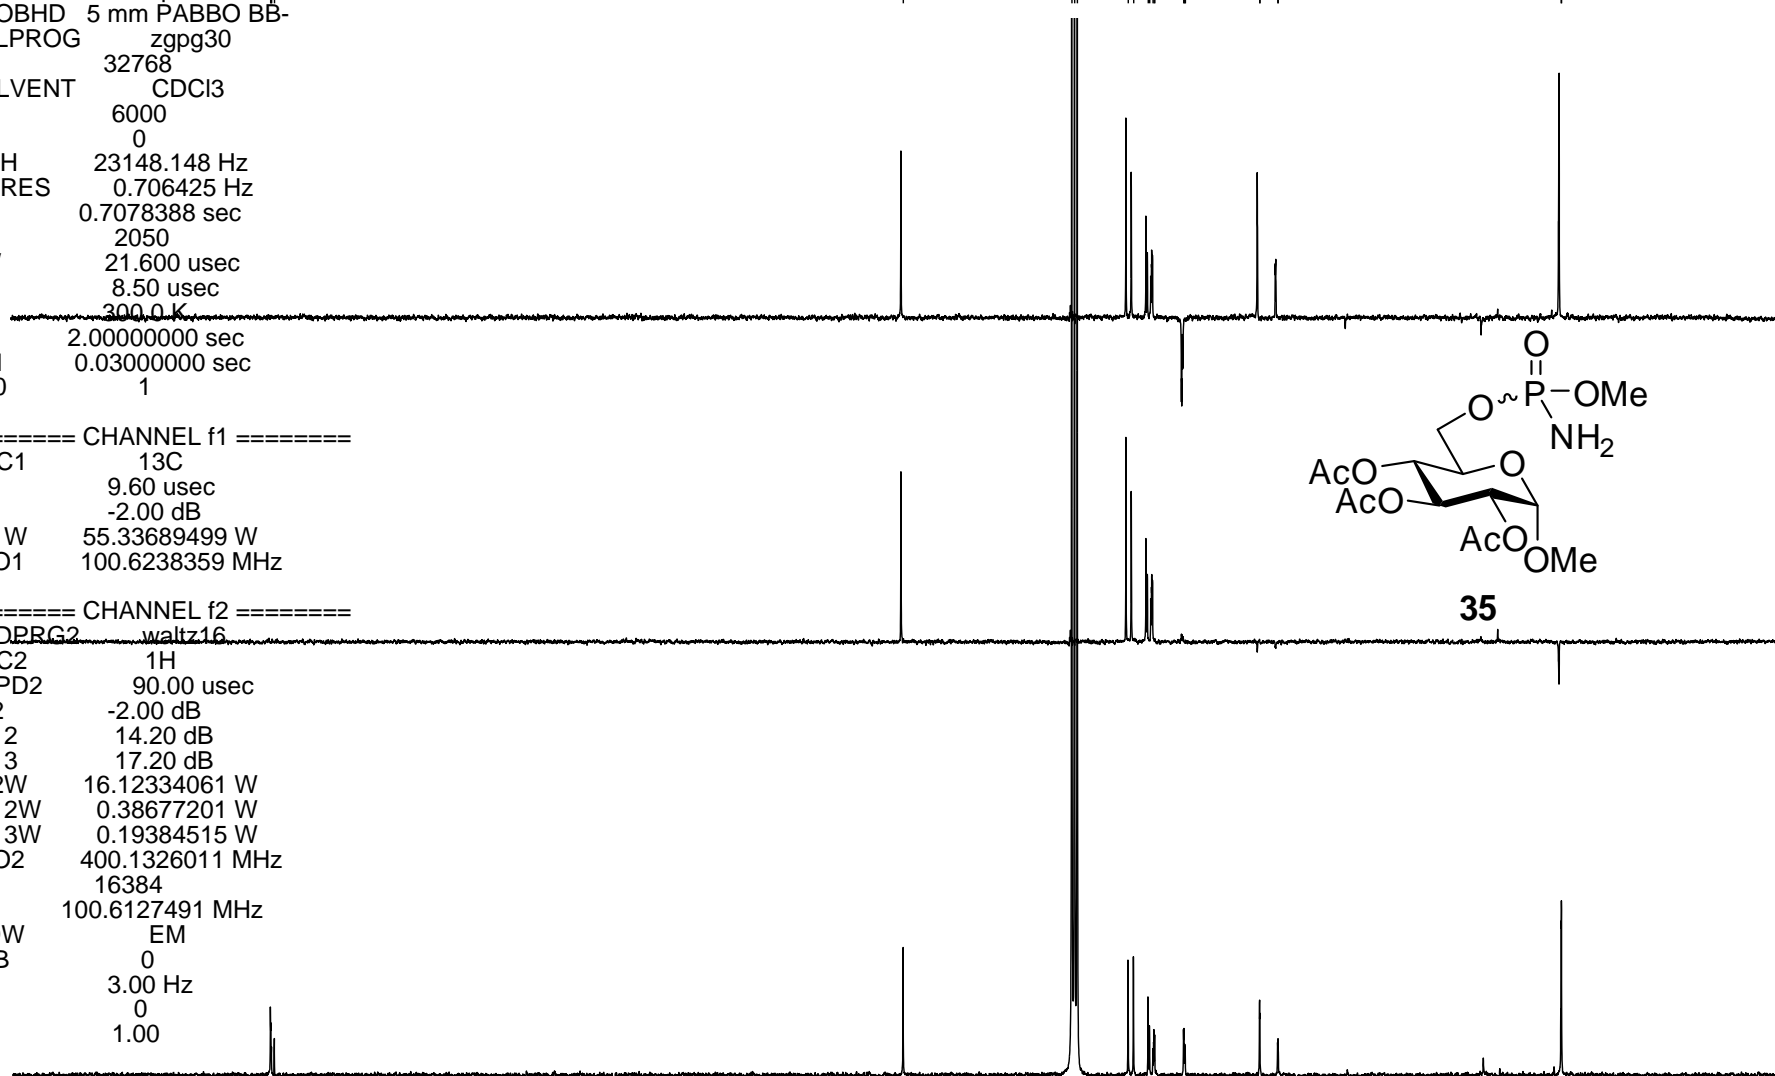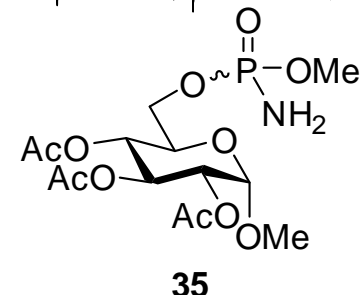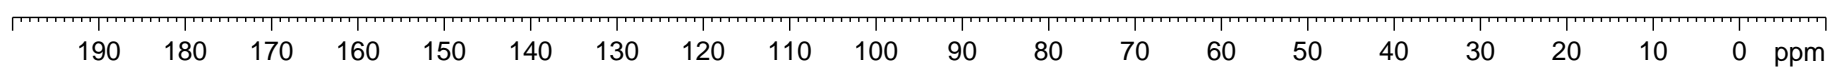

Current Data Parameters

NAME GPM-339  
EXPNO 2  
PROCNO 1

F2 - Acquisition Parameters

Date\_ 20150605  
Time 17.39  
INSTRUM spect  
PROBHD 5 mm PABBO BB-  
PULPROG zgpg30  
TD 65536  
SOLVENT CDCl3  
NS 100  
DS 0  
SWH 104166.664 Hz  
FIDRES 1.589457 Hz  
AQ 0.3146228 sec  
RG 2050  
DW 4.800 usec  
DE 6.50 usec  
TE 300.0 K  
D1 2.00000000 sec  
D11 0.03000000 sec  
TD0 1

==== CHANNEL f1 =====

NUC1 31P  
P1 13.50 usec  
PL1 2.00 dB  
PL1W 16.00742149 W  
SFO1 161.9755930 MHz

==== CHANNEL f2 =====

CPDPRG2 waltz16  
NUC2 1H  
PCPD2 90.00 usec  
PL2 -2.00 dB  
PL12 14.20 dB  
PL13 17.20 dB  
PL2W 16.12334061 W  
PL12W 0.38677201 W  
PL13W 0.19384515 W  
SFO2 400.1320007 MHz

F2 - Processing parameters

SI 32768  
SF 161.9755127 MHz  
WDW EM  
SSB 0  
GB 0  
PC 1.00

11.5553  
10.9682

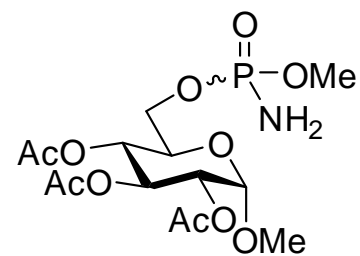

35



7.3754  
7.3571  
7.3329  
7.3279  
7.3144  
7.2952  
7.2512  
7.2335  
7.2150  
4.8276  
4.6553  
4.6465  
4.6376  
4.2387  
4.2337  
4.2280  
4.2239  
4.2187  
4.2130  
4.2059  
4.2008  
4.1905  
4.1853  
4.1640  
4.1511  
4.1490  
4.1362  
4.1283  
4.1238  
4.1216  
4.1031  
4.0864  
4.0830  
4.0745  
3.6892  
3.6791  
3.6715  
3.6613  
3.6514  
3.6373  
3.6341  
3.6119  
3.5874  
3.3930  
3.3835  
3.3683  
3.3612  
3.3583  
3.3444  
3.3185  
3.3134  
3.3100  
3.3055  
3.3021  
3.2984  
3.2804  
3.2560  
2.3213

Current Data Parameters

NAME vd-779-1  
EXPNO 1  
PROCNO 1

F2 - Acquisition Parameters

Date\_ 20150630  
Time 9.22  
INSTRUM spect  
PROBHD 5 mm PABBO BB-  
PULPROG zg30  
TD 16384  
SOLVENT MeOD  
NS 16  
DS 0  
SWH 5597.015 Hz  
FIDRES 0.341615 Hz  
AQ 1.4636873 sec  
RG 144  
DW 89.333 usec  
DE 6.50 usec  
TE 300.0 K  
D1 2.00000000 sec  
TD0 1

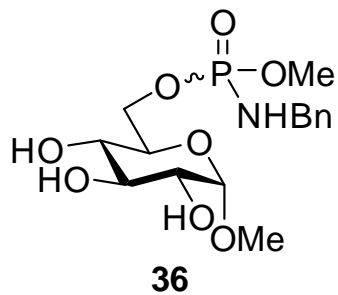

==== CHANNEL f1 =====

NUC1 1H  
P1 13.40 usec  
PL1 -2.00 dB  
PL1W 16.12334061 W  
SFO1 400.1326012 MHz

F2 - Processing parameters

SI 8192  
SF 400.1300077 MHz  
WDW no  
SSB 0  
LB 0 Hz  
GB 0  
PC 1.00



3.75  
3.80  
2.57  
2.00  
0.40  
2.08  
6.11  
9.98  
8.30  
1.94

NAME gpm-358-2D  
 EXPNO 4  
 PROCNO 1  
 Date\_ 20150701  
 Time 16.05  
 INSTRUM spect  
 PROBHD 5 mm Dual 13C/  
 PULPROG zg0dc  
 TD 32768  
 SOLVENT MeOD  
 NS 5000  
 DS 2  
 SWH 23980.814 Hz  
 FIDRES 0.731836 Hz  
 AQ 0.6832628 sec  
 RG 18390.4  
 LW 20.650 usec  
 DE 6.50 usec  
 TE 298.9 K  
 D1 3.00000000 sec  
 D11 0.03000000 sec  
 TDO 1

===== CHANNEL f1 =====  
 NUC1 13C  
 P0 25.00 usec  
 PL1 -3.00 dB  
 PL1W 75.17808533 W  
 SFO1 100.6228293 MHz

===== CHANNEL f2 =====  
 CPDPRG2 waltz16  
 NUC2 1H  
 PCPD2 90.00 usec  
 PL2 -3.00 dB  
 PL12 15.50 dB  
 PL2W 30.07123375 W  
 PL12W 0.42476746 W  
 SFO2 400.1318764 MHz  
 SI 32768  
 SF 100.6126128 MHz  
 WDW EM  
 SSB 0  
 LB 3.00 Hz  
 GB 0  
 PC 1.40

141.60  
 129.44  
 128.50  
 128.15  
 101.33  
 75.01  
 73.46  
 72.03  
 71.95  
 71.41  
 71.23  
 67.05  
 66.99  
 66.82  
 66.77  
 55.67  
 53.78  
 49.64  
 49.43  
 49.21  
 49.00  
 48.79  
 48.58  
 48.36  
 45.91

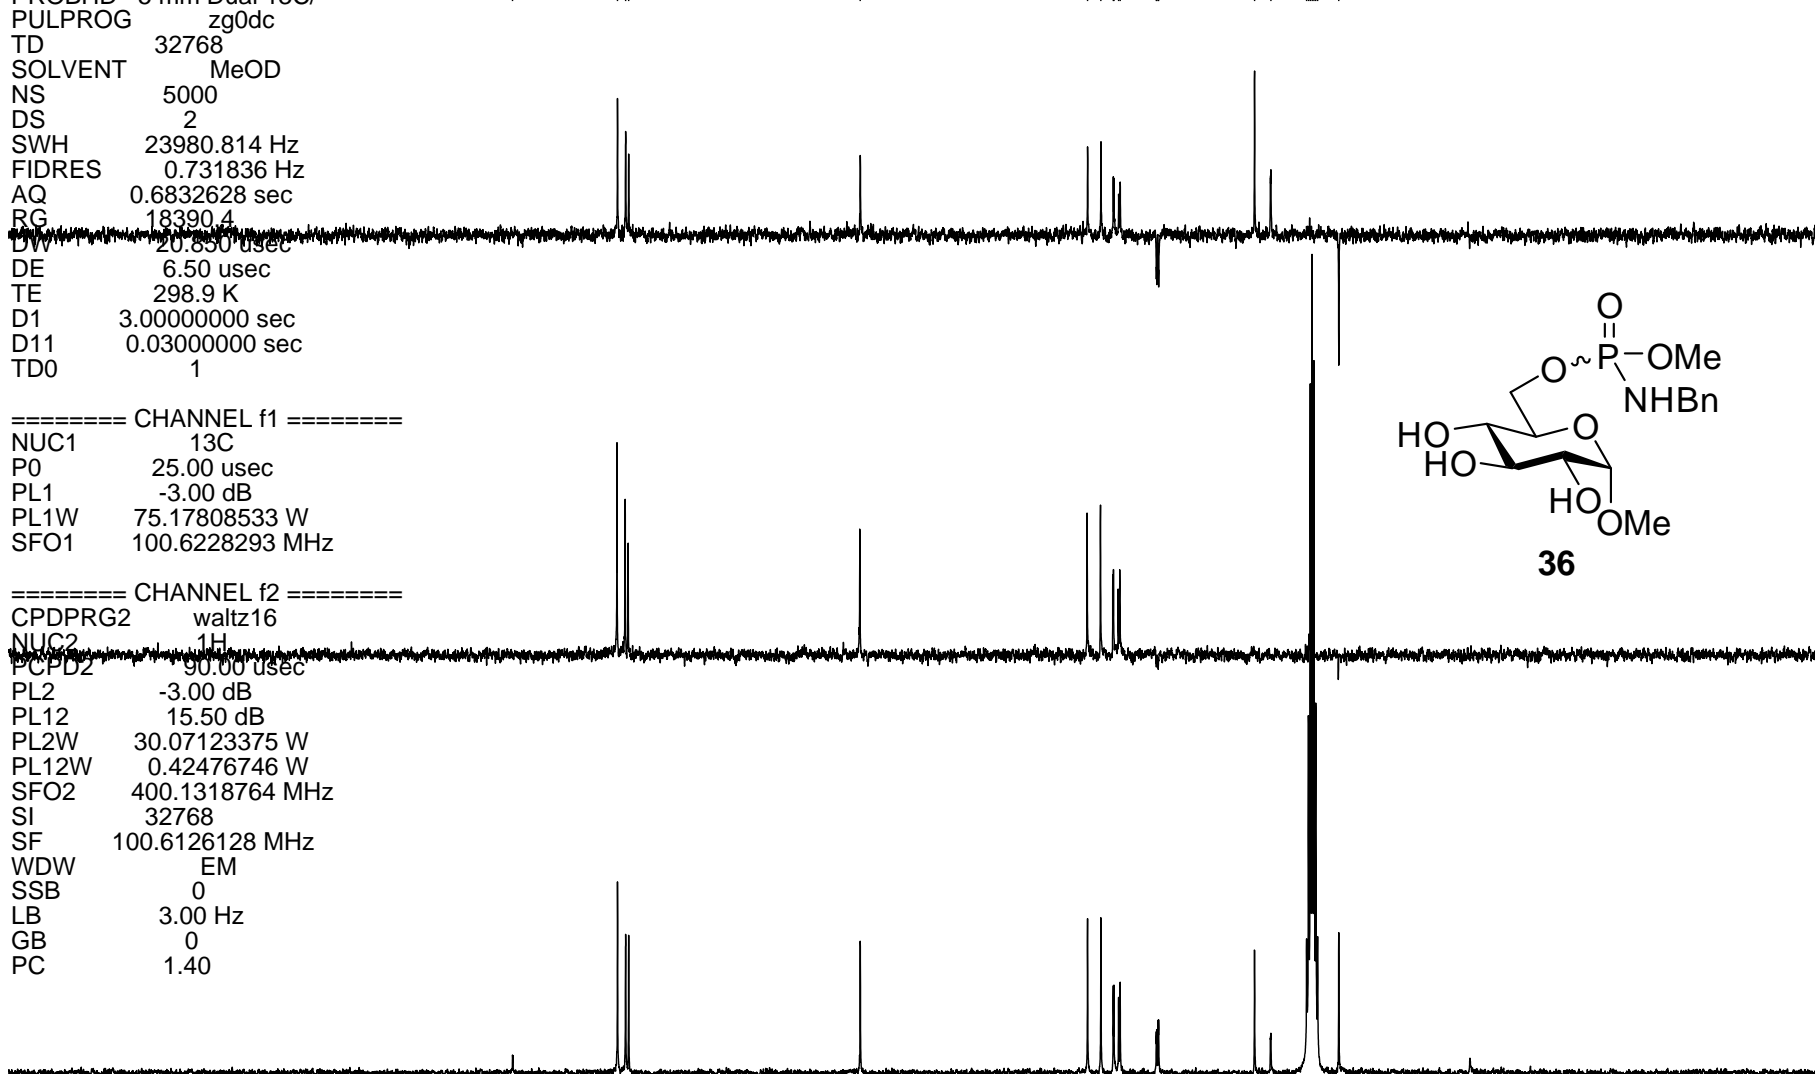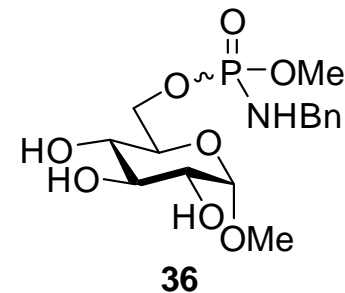

190 180 170 160 150 140 130 120 110 100 90 80 70 60 50 40 30 20 10 0 ppm

Current Data Parameters

NAME vd-779-1  
EXPNO 2  
PROCNO 1

F2 - Acquisition Parameters

Date\_ 20150630  
Time 9.25  
INSTRUM spect  
PROBHD 5 mm PABBO BB-  
PULPROG zgpg30  
TD 65536  
SOLVENT MeOD  
NS 24  
DS 0  
SWH 104166.664 Hz  
FIDRES 1.589457 Hz  
AQ 0.3146228 sec  
RG 2050  
DW 4.800 usec  
DE 6.50 usec  
TE 300.0 K  
D1 2.00000000 sec  
D11 0.03000000 sec  
TD0 1

==== CHANNEL f1 =====

NUC1 31P  
P1 13.50 usec  
PL1 2.00 dB  
PL1W 16.00742149 W  
SFO1 161.9755930 MHz

==== CHANNEL f2 =====

CPDPRG2 waltz16  
NUC2 1H  
PCPD2 90.00 usec  
PL2 -2.00 dB  
PL12 13.70 dB  
PL13 16.70 dB  
PL2W 16.12334061 W  
PL12W 0.43396533 W  
PL13W 0.21749784 W  
SFO2 400.1320007 MHz

F2 - Processing parameters

SI 32768  
SF 161.9755127 MHz  
WDW EM  
SSB 0  
GB 0  
PC 1.00

12.1944

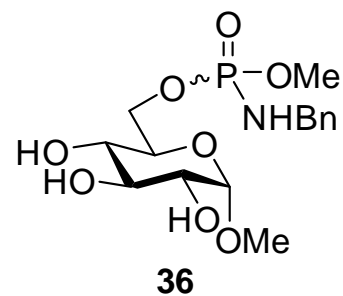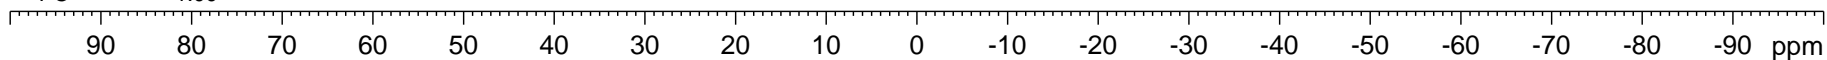

7.2406  
6.0793  
5.3707  
5.3610  
5.3535  
5.3449  
5.3365  
5.3285  
5.3190  
4.5240  
4.5165  
4.5074  
4.5008  
4.4888  
4.4828  
4.4733  
4.4660  
4.3923  
4.3839  
4.3779  
4.3694  
4.3596  
4.3509  
4.3444  
4.3357  
4.3064  
4.2958  
4.2763  
4.2658  
4.2571  
4.2504  
4.2382  
4.2203  
4.2079  
4.2023  
4.1904  
4.1720  
3.7634  
3.7573  
3.7348  
3.7292  
3.3288  
3.3161  
2.1171  
2.1097  
2.0846  
2.0218

Current Data Parameters

NAME vd-775 All  
EXPNO 1  
PROCNO 1

F2 - Acquisition Parameters

Date\_ 20150604  
Time 21.46  
INSTRUM spect  
PROBHD 5 mm PABBO BB-  
PULPROG zg30  
TD 16384  
SOLVENT CDCl3  
NS 64  
DS 0  
SWH 5597.015 Hz  
FIDRES 0.341615 Hz  
AQ 1.4636873 sec  
RG 114  
DW 89.333 usec  
DE 6.50 usec  
TE 300.0 K  
D1 2.00000000 sec  
TD0 1

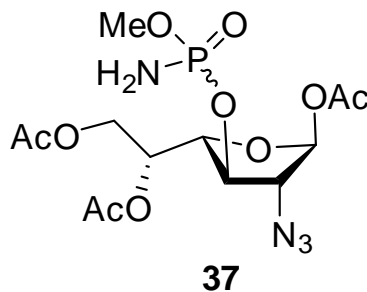

==== CHANNEL f1 =====

NUC1 1H  
P1 13.40 usec  
PL1 -2.00 dB  
PL1W 16.12334061 W  
SFO1 400.1326012 MHz

F2 - Processing parameters

SI 8192  
SF 400.1300175 MHz  
WDW no  
SSB 0  
LB 0 Hz  
GB 0  
PC 1.00

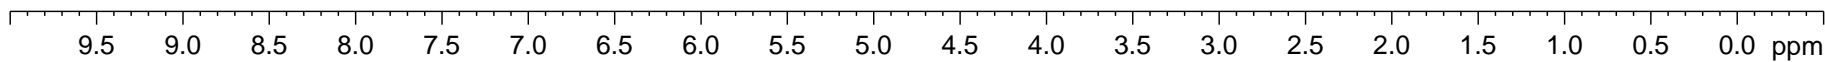

2.00  
2.32  
2.17  
2.18  
6.89  
3.28  
3.22  
4.21  
6.57  
6.78  
6.74

Current Data Parameters  
NAME vd-775 All  
EXPNO 2  
PROCNO 1

F2 - Acquisition Parameters  
Date\_ 20150604  
Time 21.48  
INSTRUM spect  
PROBHD 5 mm PABBO BB-  
PULPROG zgpg30  
TD 32768  
SOLVENT CDCl3  
NS 5000  
DS 0  
SWH 23148.148 Hz  
FIDRES 0.706425 Hz  
AQ 0.7078388 sec  
RG 2050  
DW 21.600 usec  
DE 8.50 usec  
TE 300.0 K  
D1 2.00000000 sec  
D11 0.03000000 sec  
TD0 1

==== CHANNEL f1 =====  
NUC1 13C  
P1 9.80 usec  
PL1 -2.00 dB  
PL1W 55.33689499 W  
SFO1 100.6238359 MHz

==== CHANNEL f2 =====  
CPDPRG2 waltz16  
NUC2 1H  
PCPD2 90.00 usec  
PL2 -2.00 dB  
PL12 13.70 dB  
PL13 16.70 dB  
PL2W 16.12334061 W  
PL12W 0.43396533 W  
PL13W 0.21749784 W  
SFO2 400.1326011 MHz

F2 - Processing parameters  
SI 16384  
SF 100.6127721 MHz  
WDW EM  
SSB 0  
LB 3.00 Hz  
GB 0  
PC 1.00

100.02  
99.94  
82.74  
82.67  
82.41  
82.33  
78.95  
78.90  
78.80  
78.76  
77.32  
77.00  
76.68  
70.70  
70.55  
70.53  
68.81  
68.71  
62.61  
53.61  
53.54  
53.48  
20.93  
20.76  
20.64

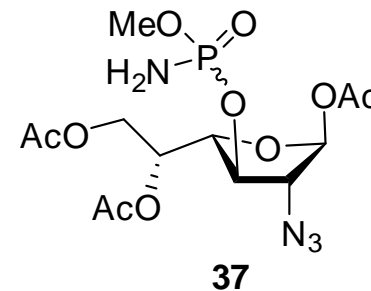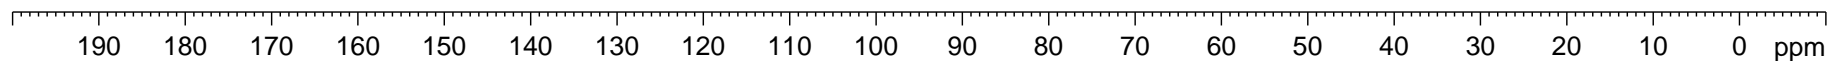

Current Data Parameters

NAME vd-775 P31  
EXPNO 1  
PROCNO 1

F2 - Acquisition Parameters

Date\_ 20150604  
Time 21.39  
INSTRUM spect  
PROBHD 5 mm PABBO BB-  
PULPROG zgpg30  
TD 65536  
SOLVENT CDCl3  
NS 36  
DS 0  
SWH 104166.664 Hz  
FIDRES 1.589457 Hz  
AQ 0.3146228 sec  
RG 2050  
DW 4.800 usec  
DE 6.50 usec  
TE 300.0 K  
D1 2.00000000 sec  
D11 0.03000000 sec  
TD0 1

==== CHANNEL f1 =====

NUC1 31P  
P1 13.50 usec  
PL1 2.00 dB  
PL1W 16.00742149 W  
SFO1 161.9755930 MHz

==== CHANNEL f2 =====

CPDPRG2 waltz16  
NUC2 1H  
PCPD2 90.00 usec  
PL2 -2.00 dB  
PL12 13.70 dB  
PL13 16.70 dB  
PL2W 16.12334061 W  
PL12W 0.43396533 W  
PL13W 0.21749784 W  
SFO2 400.1320007 MHz

F2 - Processing parameters

SI 32768  
SF 161.9755127 MHz  
WDW EM  
SSB 0  
GB 0  
PC 1.00

10.9606  
10.6319

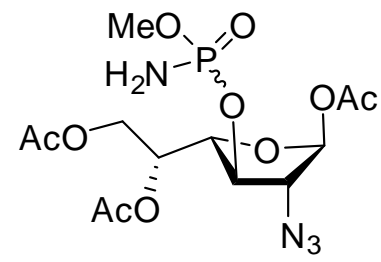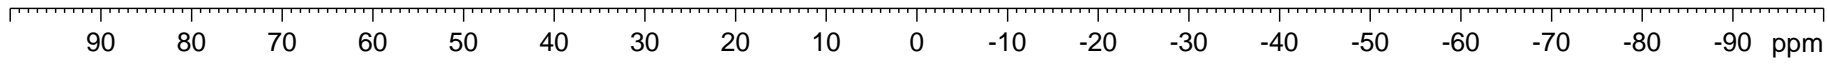



7.2409  
7.0855  
7.0743  
7.0596  
6.1263  
6.1240  
6.0865  
5.2824  
5.2715  
5.2623  
5.2543  
5.2440  
4.5964  
4.5879  
4.5834  
4.5755  
4.5683  
4.5552  
4.5368  
4.5276  
4.5217  
4.5138  
4.5018  
4.4922  
4.4259  
4.4146  
4.4045  
4.3908  
4.3781  
4.3652  
4.3578  
4.3445  
4.3307  
4.3253  
4.3150  
4.2942  
4.2846  
4.2027  
4.1851  
4.1724  
4.1549  
3.7278  
3.7239  
3.6994  
3.6951  
3.5432  
3.5297  
3.5037  
3.4892  
2.1154  
2.1006  
2.0811  
2.0715  
2.0278

Current Data Parameters

NAME vd-776 NHAc all  
EXPNO 1  
PROCNO 1

F2 - Acquisition Parameters

Date\_ 20150608  
Time 21.32  
INSTRUM spect  
PROBHD 5 mm PABBO BB-  
PULPROG zg30  
TD 16384  
SOLVENT CDCl3  
NS 64  
DS 0  
SWH 5597.015 Hz  
FIDRES 0.341615 Hz  
AQ 1.4636873 sec  
RG 144  
DW 89.333 usec  
DE 6.50 usec  
TE 300.0 K  
D1 2.00000000 sec  
TD0 1

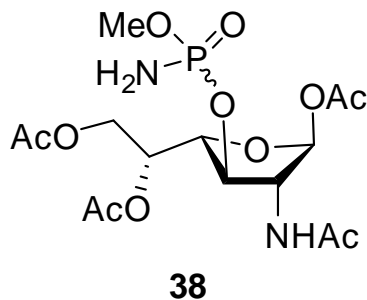

==== CHANNEL f1 =====

NUC1 1H  
P1 13.40 usec  
PL1 -2.00 dB  
PL1W 16.12334061 W  
SFO1 400.1326012 MHz

F2 - Processing parameters

SI 8192  
SF 400.1300175 MHz  
WDW no  
SSB 0  
LB 0 Hz  
GB 0  
PC 1.00

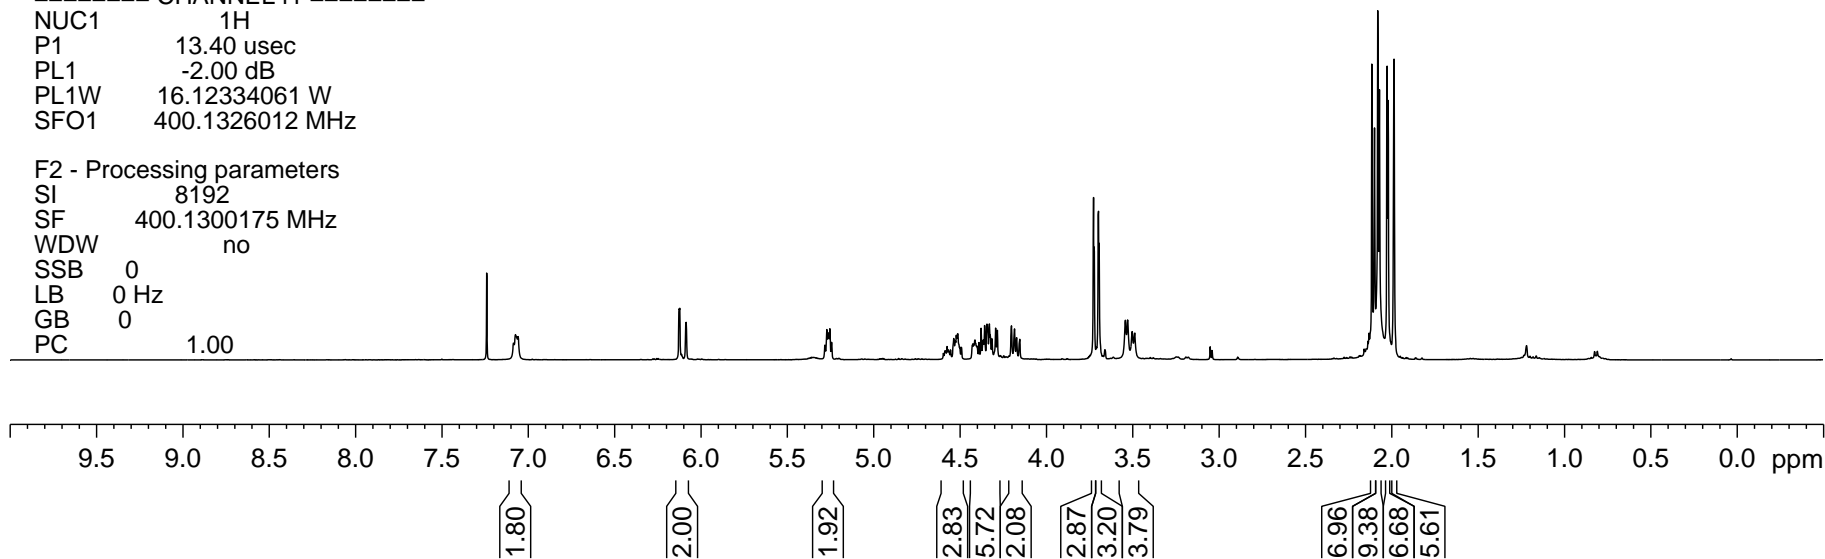

Current Data Parameters  
NAME vd-776 N13C  
EXPNO 1  
PROCNO 1

F2 - Acquisition Parameters  
Date\_ 20150608  
Time 21.34  
INSTRUM spect  
PROBHD 5 mm PABBO BB-  
PULPROG zgpg30  
TD 32768  
SOLVENT CDCl3  
NS 5500  
DS 0  
SWH 23148.148 Hz  
FIDRES 0.706425 Hz  
AQ 0.7078388 sec  
RG 2050  
DW 21.600 usec  
DE 8.50 usec  
TE 300.0 K  
D1 2.00000000 sec  
D11 0.03000000 sec  
TD0 1

==== CHANNEL f1 =====  
NUC1 13C  
P1 9.80 usec  
PL1 -2.00 dB  
PL1W 55.33689499 W  
SFO1 100.6238359 MHz

==== CHANNEL f2 =====  
CPDPRG2 waltz16  
NUC2 1H  
PCPD2 90.00 usec  
PL2 -2.00 dB  
PL12 13.70 dB  
PL13 16.70 dB  
PL2W 16.12334061 W  
PL12W 0.43396533 W  
PL13W 0.21749784 W  
SFO2 400.1326011 MHz

F2 - Processing parameters  
SI 16384  
SF 100.6127707 MHz  
WDW EM  
SSB 0  
LB 3.00 Hz  
GB 0  
PC 1.00

99.54  
99.29  
82.23  
82.16  
81.76  
81.68  
79.47  
79.43  
78.66  
78.60  
77.31  
77.00  
76.68  
69.53  
69.20  
62.62  
62.51  
61.35  
60.97  
53.57  
53.52  
53.48  
53.42  
22.88  
22.84  
21.04  
20.82  
20.65

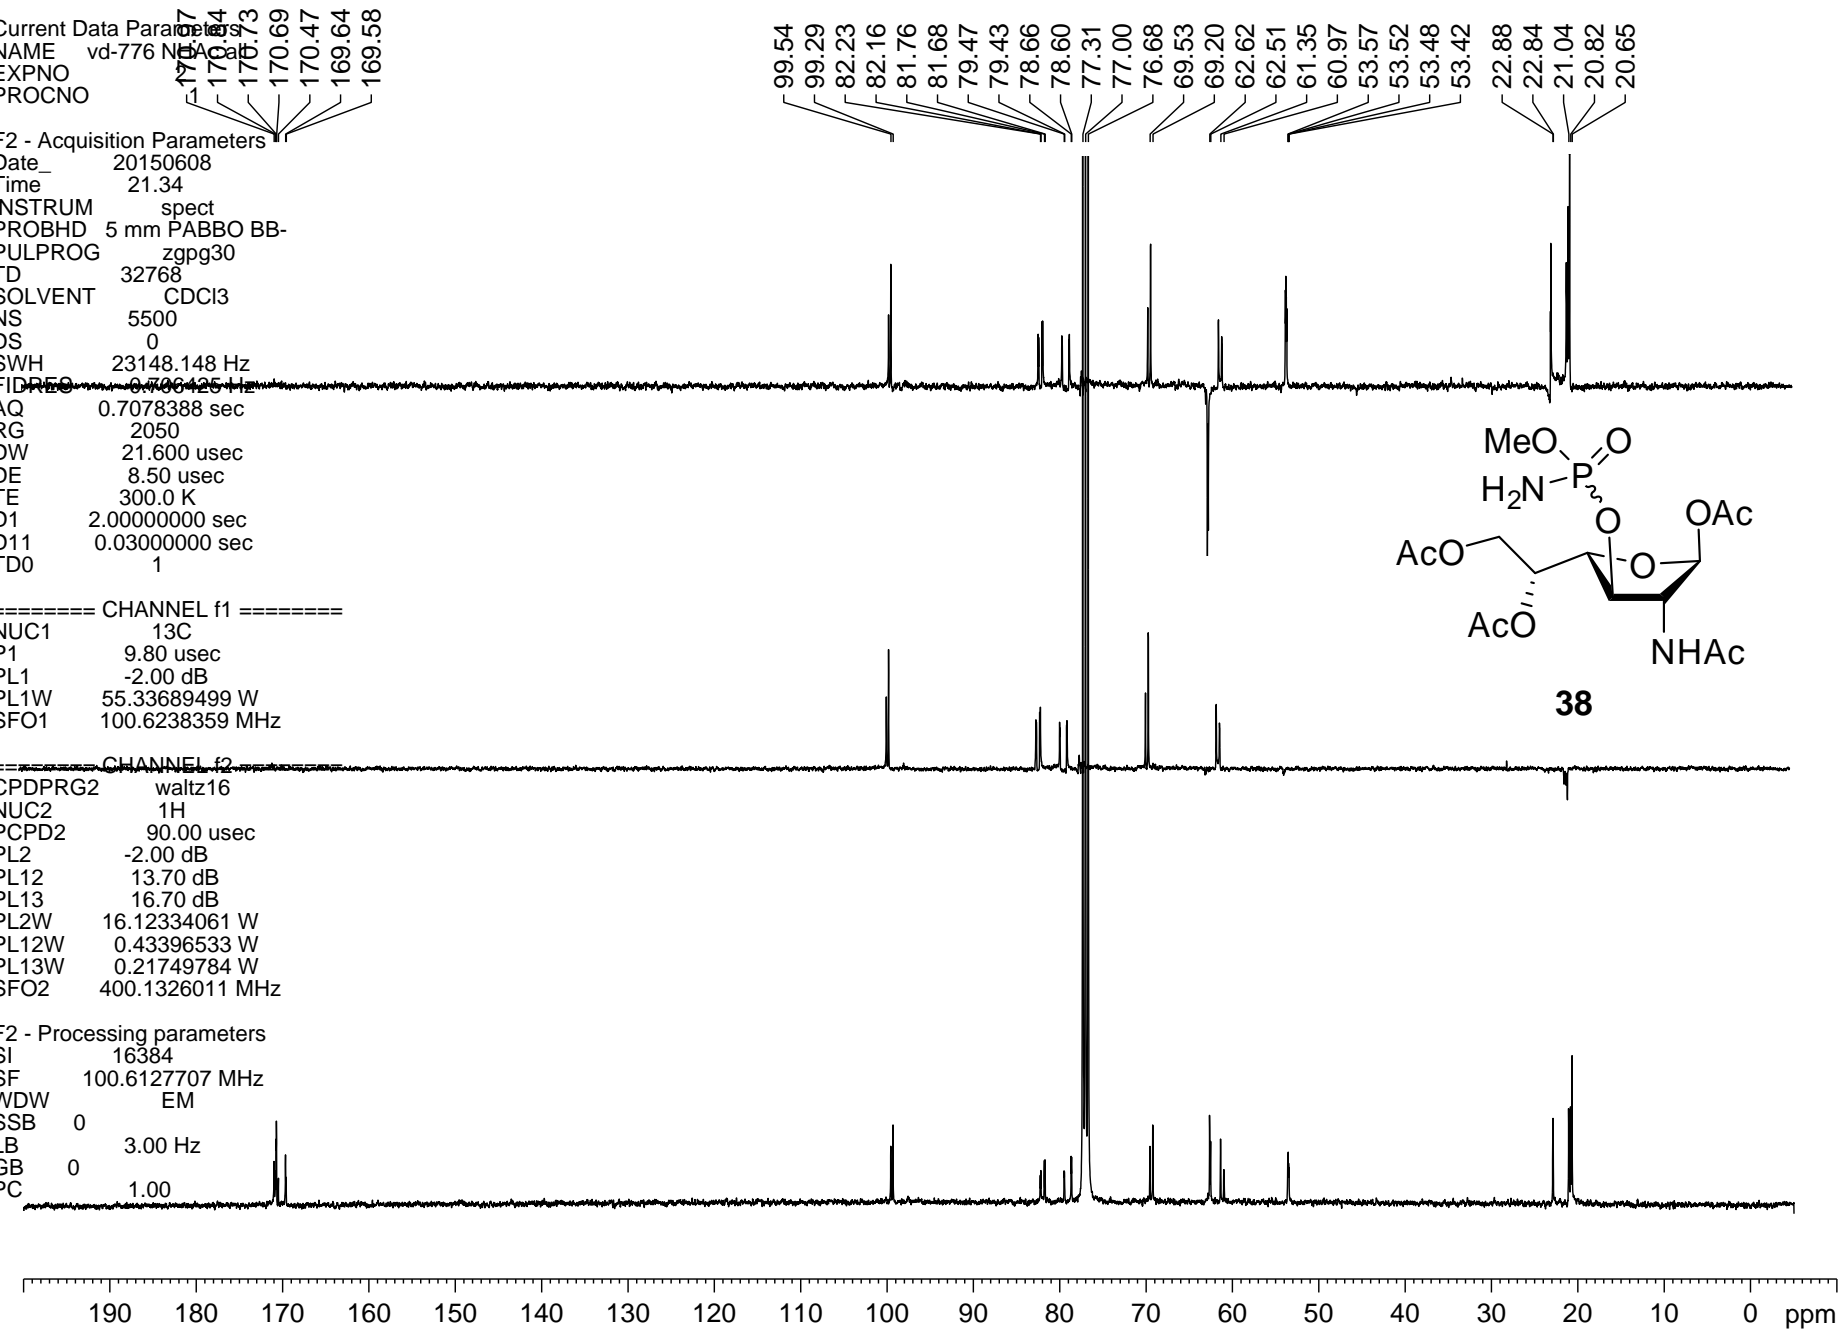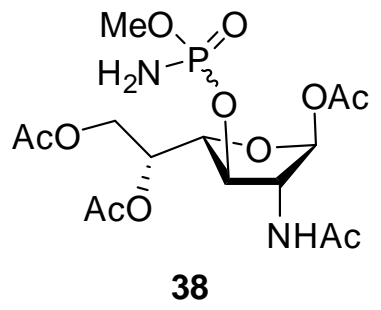

Current Data Parameters  
NAME vd-776 NHAc P31  
EXPNO 1  
PROCNO 1

F2 - Acquisition Parameters  
Date\_ 20150608  
Time 21.24  
INSTRUM spect  
PROBHD 5 mm PABBO BB-  
PULPROG zgpg30  
TD 65536  
SOLVENT CDCl3  
NS 64  
DS 0  
SWH 104166.664 Hz  
FIDRES 1.589457 Hz  
AQ 0.3146228 sec  
RG 2050  
DW 4.800 usec  
DE 6.50 usec  
TE 300.0 K  
D1 2.00000000 sec  
D11 0.03000000 sec  
TD0 1

===== CHANNEL f1 =====  
NUC1 31P  
P1 13.50 usec  
PL1 2.00 dB  
PL1W 16.00742149 W  
SFO1 161.9755930 MHz

===== CHANNEL f2 =====  
CPDPRG2 waltz16  
NUC2 1H  
PCPD2 90.00 usec  
PL2 -2.00 dB  
PL12 13.70 dB  
PL13 16.70 dB  
PL2W 16.12334061 W  
PL12W 0.43396533 W  
PL13W 0.21749784 W  
SFO2 400.1320007 MHz

F2 - Processing parameters  
SI 32768  
SF 161.9755127 MHz  
WDW EM  
SSB 0  
GB 0  
PC 1.00

11.3114  
10.6682

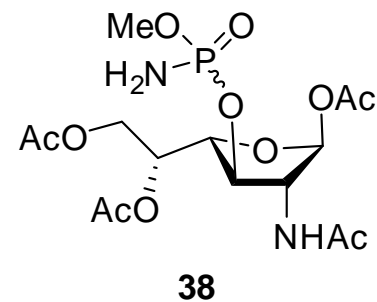

— 7.2399

5.5160  
5.5035

3.7257  
3.7215  
3.6974  
3.6931

3.0459  
3.0187

1.5120  
1.5042  
1.4078  
1.4059  
1.2961

Current Data Parameters

NAME vd-695 all  
EXPNO 1  
PROCNO 1

F2 - Acquisition Parameters

Date\_ 20140617  
Time 21.36  
INSTRUM spect  
PROBHD 5 mm Dual 13C/  
PULPROG zg30  
TD 16384  
SOLVENT CDCl3  
NS 64  
DS 2  
SWH 4789.272 Hz  
FIDRES 0.292314 Hz  
AQ 1.7105396 sec  
RG 161.3  
DW 104.400 usec  
DE 6.50 usec  
TE 298.9 K  
D1 1.00000000 sec  
TD0 1

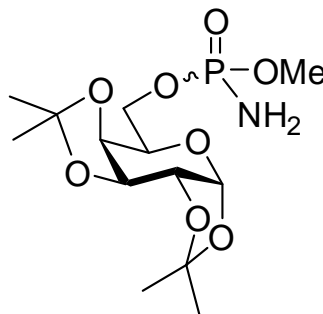

===== CHANNEL f1 =====

NUC1 1H  
P1 10.30 usec  
PL1 -2.00 dB  
PL1W 23.88643074 W  
SFO1 400.1320424 MHz

F2 - Processing parameters

SI 16384  
SF 400.1300173 MHz  
WDW no  
SSB 0  
LB 0 Hz  
GB 0  
PC 1.00



2.00

2.05

2.08

2.19

6.42

2.91

2.97

3.81

6.29

6.22

12.72

Current Data Parameters

NAME vd-695 all  
EXPNO 8  
PROCNO 1

F2 - Acquisition Parameters

Date\_ 20140618  
Time 10.04  
INSTRUM spect  
PROBHD 5 mm Dual 13C/  
PULPROG zg0dc  
TD 32768  
SOLVENT CDCl3  
NS 4793  
DS 2  
SWH 23980.814 Hz  
FIDRES 0.731836 Hz  
AQ 0.6832628 sec  
RG 18390.4  
DW 20.850 usec  
DE 6.50 usec  
TE 300.3 K  
D1 3.00000000 sec  
D11 0.03000000 sec  
TD0 1

===== CHANNEL f1 =====

NUC1 13C  
P0 13.00 usec  
PL1 -3.00 dB  
PL1W 75.17808533 W  
SFO1 100.6228293 MHz

===== CHANNEL f2 =====

CPDPRG2 waltz16  
NUC2 1H  
PCPD2 90.00 usec  
PL2 -2.00 dB  
PL12 15.90 dB  
PL2W 23.88643074 W  
PL12W 0.38739258 W  
SFO2 400.1318764 MHz

F2 - Processing parameters

SI 32768  
SF 100.6127699 MHz  
WDW EM  
SSB 0  
LB 3.00 Hz  
GB 0  
PC 1.40

109.67  
109.62  
108.88  
96.29  
96.26  
77.32  
77.00  
76.69  
70.82  
70.67  
70.45  
70.43  
67.49  
67.43  
66.93  
66.87  
65.64  
65.59  
65.41  
65.36  
53.32  
53.27  
25.92  
24.91  
24.88  
24.45  
24.41

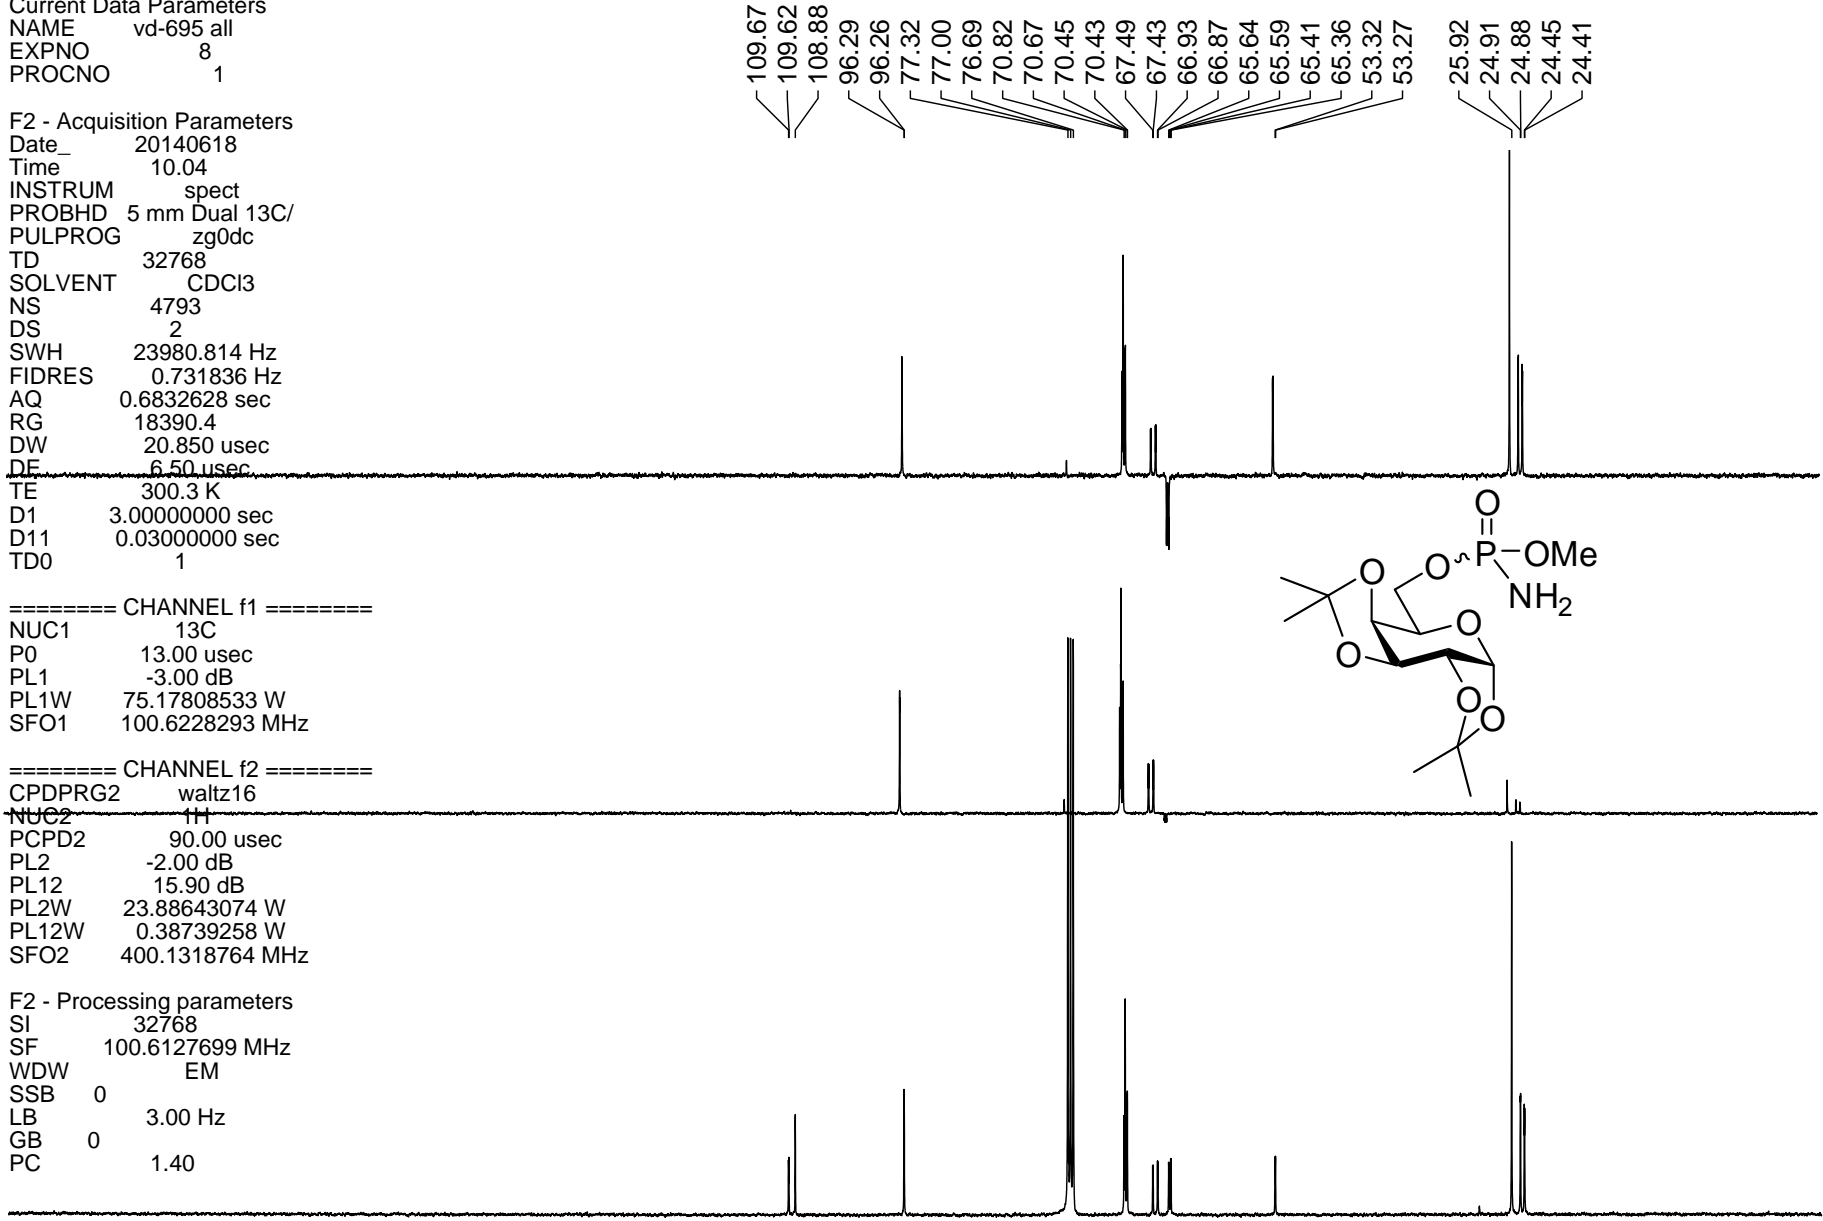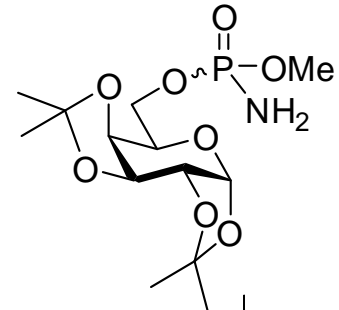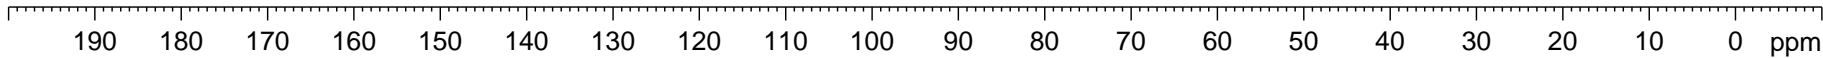

Supplement: c5ob01017a1.pdf [file c5ob01017a1.pdf]
